# Supplementary material for: Degradation dynamics of microRNAs revealed by a novel pulse-chase approach
Source: HighWire-hosted journal article supplement (doi:10.1101/gr.198788.115), 2016-01-28
Supplement: SuppMaterial.docx [file SuppMaterial.docx]

**INVENTORY OF SUPPLEMENTAL MATERIAL**

**Supplemental Figures**

Figure S1. Optimization of 4sU RNA labeling for analysis of miRNAs in 3T9 fibroblasts

Figure S2. Genome-wide analysis of miRNA degradation rates by pulse-chase small RNA sequencing

Figure S3. Regulation and dynamics of miRNA expression by transcription and decay

Figure S4. miRNA decay and target abundance

Figure S5. Details on miRNA isoforms (isomiRs) and decay dynamics

Figure S6. Details on miRNA regulation upon serum stimulation and decay dynamics

Table S1. miRNA decay rates

Table S2. Synthesis rate and Time evolution model of miRNA regulation

Table S3. Target:miRNA ratios (TPM)

Table S4. IsomiRs

Table S5. miRNAs in Serum Stimulation

**Supplemental Figure Legends**

**Supplemental Methods**

**Supplemental References**

**SUPPLEMENTAL FIGURE LEGENDS**

**Figure S1. Optimization of 4sU RNA labeling for analysis of miRNAs in 3T9 fibroblasts**

**A.** The scheme illustrates the experimental strategy used for 4sU pulse labeling of RNA. 4sU (300 M) is added into the medium and RNA samples are collected at different time points (15’-30’-45’-60’-120’-180’). 4sU incorporated into newly synthesized RNA is isolated by thiol-specific biotinylation followed by pull-down with streptavidin beads. Unlabeled RNA (0’) is used as a reference. **B.** The plot reports the yield of 4sU RNA isolation along the time course, expressed as percentage of labeled RNA over total RNA (4sU/Tot). The incorporation of 4sU increases linearly up to 2 h, when it reaches a maximum. **C.** The isolation of 4sU RNA was repeated four times starting from the same RNA (40 g obtained from cells labeled for 3 h) to evaluate the technical variability of the procedure. The red bar shows the mean ± s.e.m. **D-E-F.** Possible unspecific effects of 4sU treatment (300 M, 3 h) on 3T9 fibroblasts were evaluated. **D.** Cell proliferation was evaluated by calculating the doubling time (upper panel) and cell cycle profile (lower panel) of 3T9 cells following 4sU treatment. Cell doubling time was measured by counting cells at different time points (0, 8 and 24 h). Shown is the average with the s.e.m. of three experiments. The cell cycle profile of control (untreated – UNT) and 4sU treated (4sU) cells was analyzed by FACS (MACSQuant Analyser-Miltenyi) using propidium iodide (PI) staining. Shown is the distribution of cells in the G1, S and G2/M phases of the cell cycle from a representative experiment. No significant differences between UNT and 4sU samples were observed. **E.** Prolonged treatment with high 4sU doses might cause nucleolar stress (Burger et al., 2013). The effects of 4sU treatment on nucleoli were evaluated by directly analyzing their morphology by immunofluorescence staining of the nucleoli marker Nucleolin (anti-Nucleolin, Abcam, ab50279) and nuclei with DAPI. The integrity of ribosomal RNA (rRNA) after 3 h of 4sU treatment (0 h) and following an 8 h wash out (8 h) was also verified by gel electrophoresis. No differences were observed between treated samples and untreated controls. **F.** The effects of 4sU treatment on miRNA expression were evaluated by small RNA sequencing (Illumina). The scatter plot shows miRNA expression (as reads in log10 scale) in control (untreated) and 4sU treated (4sU) samples. In total, 275 miRNAs were expressed above the threshold (>10 reads, marked by black dashed lines) and were considered in the analysis. The blue dashed line highlights the linear correlation. The two samples are highly correlated (Coefficient of Determination, R2=0.99). **G-H-I.** The labeling of different RNA species during the 4sU pulse labeling (300 M, 3 h) was analyzed by RT-qPCR. Results are expressed as the 4sU incorporation rate, calculated as the percentage of 4sU-labeled RNA over total RNA for a specific RNA species at the indicated time points. Data were normalized to the total yield of 4sU-labeled RNA at each time point. **G.** The plot shows the incorporation dynamics of protein coding genes (mRNAs), including two unstable (*Ccne2* and *Myc*) and two relatively stable genes (*Rplp0* and *Gapdh*). **H.** Incorporation rates of primary miRNA transcripts (pri-miRNAs). **I.** Incorporation rates of mature miRNAs (miRNAs), as quantified by miScript Primer Assays (Qiagen). miRNAs in the legend are ordered according to their labeling rate. **L.** A lentiviral Tet-inducible expression system (pSLIK-neo) was used to exogenously induce expression of miR-182 and miR-34a. After infection and selection with neomycin (750 μg/mL), miRNA expression was induced for 3, 8 and 11 h with doxycycline (doxy, 2 g/ml). Levels of miR-182 and miR-34a precursors (pri-mir-182/-34a) and mature miRNAs were evaluated by RT-qPCR. The plot shows log2 fold-change in expression relative to non-induced cells (NI) from one out of two independent experiments. **M-N.** The loading of exogenously expressed miR-34a onto miRISC complexes, which carry out gene silencing, was evaluated using AGO2 RNA immunoprecipitation (AGO2-RIP). 3T9 cells transduced with the pSLIK-miR34a construct were treated with vehicle or with doxy (2 g/ml) for 3 h and used in the AGO2-RIP experiment. Two parallel immunoprecipitations were performed, one used to analyze proteins by western blot (panel **M**) and the other one used to extract RNA and analyze miRNAs loaded on AGO2 (panel **N**). **M.** The specificity of the RIP was evaluated by western blot using the anti-AGO2 antibody (Sigma Aldrich, SAB4800048). AGO2 protein (arrowhead) is visible in the RIP performed with the AGO2 antibody, but not with the unrelated (IgG) antibody. **N.** miRNA levels in RIP samples were analyzed by RT-qPCR. MiR-21 and let-7b were used as positive controls, while Snord72 served as negative control for the RIP. A similar increase in total miR-34a and AGO2-loaded miR-34a (compare **L** and **N**) was observed, indicating that after 3 h newly synthesized miRNAs were efficiently loaded on AGO2.

**Figure S2. Genome-wide analysis of miRNA degradation rates by pulse-chase small RNA sequencing**

**A.** The nucleotide composition and length of sequenced miRNAs were analyzed and plotted against the 4sU incorporation rates. Each box plot shows the 4sU incorporation rate [i.e. ratio of raw reads obtained by 4sU RNA libraries (0 h, N = 3) over total RNA libraries (untreated + 4sU treated, N=2)] according to miRNA length or the number of uridine, cytosine, adenine, and guanosine bases. No biases in miRNA length or base composition, in particular, in uridine number, were observed as consequence of the labeling and purification procedure. **B-C-D.** Raw sequencing data were internally normalized to miR-92a-3p, which is a highly stable (T1/2 > 24 h), abundant and ubiquitously expressed miRNA. Alternatively, data were normalized to other miRNAs with similar features or normalized to library size (Tot-reads), which produced similar results. **B**. Average read counts (N=3) for the most stable miRNAs in the decay dataset. MiR-92a-3p is marked in red while reads for all miRNAs (Tot-reads) are marked in black. Data are reported on a log10 scale. **C.** The plots show the fluctuation of raw reads for miR-92a-3p (left) or for total reads (right) at each time point in the three independent biological experiments that compose the decay dataset. **D.** Correlation analysis between different normalization strategies. Each dot represents the log2 ratio of the time points over the 0 h in each experimental set, with different experiments marked in different colors.

**Figure S3. Regulation and dynamics of miRNA expression by transcription and decay**

**A.** The scheme illustrates the strategy used to define genomic boundaries for miRNA primary transcripts (pri-miRNA) and to calculate the synthesis rate (k1). Examples are shown in panel **B**. In the case of intergenic species, primary transcripts were defined as regions i) with a continuous 4sU transcriptional track, ii) not overlapping with intervening transcripts and iii) associated with a clear POL2 signal in the close proximity of a H3K4Me3 peak at the putative promoter. In the case of intronic species, the analysis was restricted just to the intron containing pre-miRNA species. RNA-seq (TOT and 4sU) are the results of triplicate experiments (biological replicas). In order to infer synthesis rates, Reads Per Kilobase of Million mapped (RPKMs) of 4sU- and TOT-RNA-seq were provided to the R/Bioconductor software INSPEcT (de Pretis et al., 2015), which integrates expression as synthesis rate (RPKM per hour, RPKM/h). RPKM/h rates were converted into CPC/h by droplet digital PCR (ddPCR, Bio-Rad), shown in panel **C**. Six different pri-miRNAs were quantified from 4sU-labeled and total RNA extracted from growing (3T9-GW) or quiescent (serum deprived, 3T9-SD) cells. Digital PCR was performed with different amounts of input RNA (0.25 and 2 ng of 4sU-labeled RNA; 1.25 and 10 ng of total RNA), obtaining highly linear results from all the amounts used as input (data not shown). Copies/ng were converted into copies/cell by estimating the RNA content per cell from multiple experiments (11.9 pg for GW cells; 7.78 pg for SD cells) and the 4sU content per cell (6.3 fg for GW cells; 2.18 fg for SD cells). As shown in the bar graph, ddPCR and RNA-seq data are highly correlated. Thus, it was possible to calculate a scaling factor (SF=7.36), for the conversion of RPKM/h into CPC/h. **D.** Mathematical modeling of accumulation and degradation dynamics of miRNAs (thick colored lines) and pri-miRNAs (thin black lines) by defined kinetic parameters and according to different proliferation states (= 1/TD, doubling time). The dashed vertical line marks when synthesis was shut off. The blue and red lines highlight the behavior of slow and fast decaying miRNAs, respectively.

**Figure S4. miRNA decay and target abundance**

**A.** Distribution of target:miRNA ratios (targets per miRNA – TPM) by histogram and box plot. Left: the distribution of TPM for targets with seed interaction (TPM_s) is shown. Based on the distribution, the two most distant classes were selected: ‘High’ (N=22, TPM > 80th PCTL); ‘Low’ (N=22, TPM < 20th PCTL). Right: a contingency analysis correlating ‘High’ and ‘Low’ TPM classes with the miRNA decay classes is shown. TPM classes were further distinguished according to the type of complementarity between targets and miRNAs: “seed”, targets with seed interaction (Chi2=10.68 p=0.0048); “3C.03”, targets with seed plus 3’ compensatory site with moderate interaction (Chi2=13.97 p=0.0022); “3C.05”, targets with seed plus 3’ compensatory site with extensive interaction (Chi2=11.05 p=0.0040). **B.** Abundance of all targets (as copies per cell – CPC, log10 scale) is correlated with ‘fast’ and ‘slow’ miRNAs by box-plot. **C.** miRNA half-lives (T1/2) were correlated with classes of miRNA targets with very low (< 20th PCTL) or high (> 80th PCTL) target abundance. **D.** miRNA half-lives (T1/2) were correlated with classes of miRNA expression with very low (<20th PCTL) or high (>80th PCTL) miRNA abundance. **E.** MiRNA half-lives (T1/2) were correlated with classes of miRNA synthesis rates with very low (< 20th Pctl) or high (> 80th Pctl) transcription rates (K1, CPC/h). **B-E.** P-values were determined by Wilcoxon test.

**Figure S5. Details on miRNA isoforms (isomiRs) and decay dynamics**

**A.** Shown are the number of mapped reads (average of three independent experiments) for canonical miRNAs or miRNA variants in the decay dataset. MiRNA isoforms were further distinguished into 5’-end non-templated (5’-NT), 3’-end non-templated (3’-NT) and trimmed forms as described in **Figure 5A**. The data of small-RNA sequencing from 4sU RNA (4sU – 0 h), or total RNA isolated from cells treated (Tot, +4sU), or not (Tot, unt), with 4sU administration (300 M, 3 h). **B.** 3’-end non-templated (3’-NT) forms were further distinguished, according to the type of nucleotide added, into A-, C-, G-, U- forms plus mixed variants, which contain more than one attached nucleotide type. **C.** Frequency of tailing (% of 3’-NT/TOT) was correlated with miRNA decay class (fast, other, slow). **D-G.** Half-lives of miRNAs are plotted against tailing (3’-NT/TOT, panel **D**; Pearson’s coefficient = 0.14) or trimming (TRIM-2/TOT, panel **G**; Pearson’s coefficient = 0.01) frequencies. Curved lines highlight the reciprocal relationship. Dashed curves mark confidence intervals. Shown also the Coefficient of Determination of the fitting (R2). **E.** Frequency of 3’-NT variants, distinguished according to the attached nucleotide, was correlated with ‘fast’ decaying miRNAs as compared to all other (other + slow) miRNAs. **F.** Frequency of trimming (% of TRIM-2/TOT) was correlated with miRNA decay class. To be stringent with the classification, only variants shortened by at least two nucleotides were considered (‘Trim-2’). **C-E-F.** P-values were calculated by the Wilcoxon test; n.s., not significant. **H-I.** RNA was isolated from AGO2-RIP experiments (N=3) and used for high-throughput (Illumina) sequencing of small RNA species. Matched total RNA was used to prepare ‘input’ libraries. **H.** The scatter plot shows the expression values of miRNAs from AGO2-RIP experiments as compared to total RNA (‘input’). A total of 437 miRNAs were expressed above the threshold (>10reads) and considered in the analysis. Values are averages of three independent experiments. The red dashed line highlights the linear correlation (Coefficient of Determination, R2= 0.906). Dark gray dots mark miRNAs in common with the decay dataset. **I.** The abundance of miRNAs on AGO2 was analyzed within different decay classes, including all miRNAs (guide and passenger, N=186) or just guide miRNAs (N=129). P-values were calculated using the Wilcoxon test.

**Figure S6. Details on miRNA regulation upon serum stimulation and decay dynamics**

**A.** Schematic representation of the serum stimulation protocol in 3T9 mouse fibroblasts. Growing cells (GW) were serum depleted (SD, 0% FBS) for three days to induce cell cycle arrest (G0). SD cells were, then, stimulated with serum (10% FBS) for up to 12 h to promote re-entry into the cell cycle. RNA was collected at different time points for analysis of expression of genes and small RNA species. Cells were also collected to check cell cycle distribution by FACS and the BrdU incorporation assay. **B.** The bar graph shows the quantification of cell cycle re-entry induced upon serum stimulation by BrdU incorporation in two independent experiments. **C.** The expression of early (left panel) and late (right panel) serum response genes was measured over the time course of serum stimulation. The data are representative of one out of two independent experiments. The dashed line marks the G1/S transition boundary, as determined by the BrdU assay. **D.** Heat-map shows fold-change (log2) of serum-regulated miRNAs (N=52) along the time course (0 – 12 h) in two independent experiments. ‘Fast’ and ‘Slow’ decay miRNAs are indicated in red and blue respectively. **E-F.** Bar graphs report the half-lives of 16 serum-regulated miRNAs measured by pulse-chase in serum-depleted (SD) cells and compared with those from growing cells (GW). In panel **E,** miRNAs downregulated upon serum addition are shown, while in panel **F** miRNAs upregulated upon serum addition are reported. ‘Fast’ and ‘slow’ miRNAs (as determined by pulse-chase in growing cells) are boxed. An asterisk marks miR-21, the only miRNA among those analyzed that showed a considerably different half-life in the two conditions. **G.** The heat-map shows the variation of miRNA primary transcripts (pri-miRNAs) over the time course, as in panel D. Transcription of pri-miRNAs at each time point was calculated as described previously (see **Figure S4A**). Data are expressed as log2 fold-change over the 0 h time point. The decay of miRNAs (as in panel **D**) and the type of miRNA locus (intergenic, intronic and antisense) are indicated by the color code. **H.** The pie chart summarizes the number of miRNAs with changes in transcription (Chi2 =12.8, p=0.0017; Contingency test) within classes of serum-regulated miRNAs. **I.** The heat-maps show the fluctuations in miRNA targets over the time course of serum stimulation, as in panel D. Targets were further distinguished according to their complementarity to the miRNA 3’ end, as previously described (see **Figure 4**). TG_seed, seed interaction; TG_3C, seed plus 3’ compensatory site with moderate (3C.03) or extensive (3C.05) interaction. miRNA decay is indicated by the color code (as in panel D). Purple boxes refer to miRNAs that showed marked variations in miRNA targets over the time course. **J.** The plots report the fluctuation of tailing (left, 3’-NT/TOT) and trimming (right, TRIM-2/TOT) ratios of downregulated (in blue), upregulated (in red) or all miRNAs (in black) over the time course of serum stimulation. P-values were calculated by Wilcoxon test.

**SUPPLEMENTAL METHODS**

**Cell treatments and procedures**

Mouse parental 3T9 fibroblasts were cultured in DMEM (Dulbecco’s modiﬁed Eagle’s medium) supplemented with 10% fetal bovine serum (FBS), 100 U/ml penicillin and 100 g/ml streptomycin. hTERT immortalized human BJ fibroblasts were culture in MEM supplemented with 10% FBS, NEAA, and hygromycin. HeLa cells were grown in Eagle’s minimum essential medium supplemented with 10% FBS. 3T9 cells were induced to quiescence in a serum-deprived medium for 3 days. Cell cycle re-entry was stimulated by adding fresh medium with 10% FBS. For cell cycle analysis, cells were treated with 33 µM BrdU for 30 min, harvested by trypsinization and ethanol-fixed. Staining was performed with anti-BrdU primary antibody (1:5 in PBS 1% BSA, BD Biosciences) and anti-mouse Cy5-conjugated secondary antibody (Jackson Immunoresearch). DNA was stained with O.N. incubation with 2.5 µg/ml propidium iodide (Sigma). Samples were acquired on a FACS-CALIBUR (BD Biosciences) flow cytometer and analyzed using FlowJo 10 software. For immunofluorescence analysis, cells were plated on coverslips and after treatment with 4sU (300 M, 3 h) cells were fixed with paraformaldehyde. Nucleoli were stained with anti-nucleolin (1:800, Abcam Cat. Num.ab50279) plus anti-rabbit-FITC conjugated secondary antibody (1:500, Jackson Immunoresearch). Nuclei were stained with DAPI. Visual inspection of nucleolar stress was performed under a fluorescent microscope (Olympus AX70; 40x and 100x objective lens).

**Isolation of 4sU RNA**

Starting from 40 g of total RNA diluted in 100 µl of RNase-free water, 100 µl of biotinylation buffer (2.5× stock: 25 mM Tris pH 7.4, 2.5 mM EDTA) and 50 µl of EZ-link biotin-HPDP (1 mg/ml in DMF; Pierce/Thermo Scientific 21341) were added and incubated for 3 h at RT. Unbound biotin-HPDP was removed by adding chloroform/isoamylalcohol (24:1) and purifying the mix using MaXtract high-density tubes (Qiagen). RNA was precipitated by adding NaCl (5 M) at 1/10 volume and isopropanol at equal volume. Biotinylated RNA was resuspended in water (55°C, 5’), quantified with a Nanodrop 1000 spectrophotometer (to keep track of the yield after the first phase of the procedure) and, then, purified using 50 µl of Dynabeads MyOne Streptavidin T1 (Invitrogen). Before mixing with RNA, beads were washed twice in Wash Buffer A (100 mM NaOH, 50 mM NaCl) and once in Wash Buffer B (100 mM NaCl), then resuspended in 100 µl of Buffer C (2 M NaCl, 10 mM Tris-pH:7.5, 1 mM EDTA, 0.1% Tween-20) to a final concentration of 5 μg/μl. RNA was added in an equal volume and rotated at RT for 15 min. Beads were washed 3 times with Wash Buffer D (1 M NaCl, 5 mM Tris pH 7.5, 0.5 mM EDTA, 0.05% Tween-20). RNA was eluted from the beads in 100 µl of 10 mM EDTA in 95% formamide (65°C, 10 min). The eluted fraction was diluted in TRIzol® LS Reagent *(*Life Technologies; cat.no. 10296-028*)* and RNA was extracted with the miRNeasy Micro Kit (Qiagen; cat.no. 217084) and finally eluted in 14 μl of RNAse free water. 4sU-RNA quantification was conducted with Qubit® (Life Technologies).

**Small RNA sequencing and data analysis**

Total RNA, including small species, was isolated through the miRNeasy Mini (Qiagen). When the expected yield was <1g, the miRNeasy Micro Kit (Qiagen) was used. Small RNA sequencing libraries were prepared using 300 ng of 4sU-RNA (decay dataset) or 1000 ng of total RNA (serum-stimulation dataset) with the Illumina TruSeq™ Small RNA Kit, following manufacturer’s instructions. We additionally sequenced RNA from growing cells (not labeled without isolation – UNT), total RNA pulsed with 4sU (labeled without isolation – 4sU) and 4sU RNA from non-labeled cells (non-labeled with isolation, negative control – NEG). Sequencing was performed on an Illumina HiSeq 2000 at 50 bp single-read mode and 20 million read depth (8x). Data analysis was performed with the *IsomiRage* workflow, as previously described (Muller et al., 2014). Raw data together with detailed description of the procedures are available in GEO database.

**Normalization of small RNA sequencing data**

Data normalization was performed after reads mapping, assignment and filtering. In the “decay dataset”, data were normalized using miR-92a-3p reads (i.e., canonical miRNA and other templated reads), a highly expressed and stable miRNA (T1/2>24 h by RT-qPCR, **Supplemental** **Fig. S2B-C**). Other normalization approaches, employing abundantly expressed and stable miRNA species (e.g. miR-25-3p) or by library size, yielded similar results as they were moderately, or highly, correlated during the time course (**Supplemental** **Fig. S2D**). After data normalization, the background level (reads in the negative control - 4sU-RNA extracted from unlabeled total RNA) was subtracted from each sample. The negative control (NEG) library had an average number of reads that was < 3% respect to the labeled sample, suggesting that 4sU libraries had purity > 97%.

In the “serum-stimulation dataset”, normalization was performed with the library size (reads-per-million) and, then, further corrected for serum-induced RNA amplification. Briefly, the RNA content of the cells was measured at each time point (repeated analysis of yield of RNA extraction from the same number of cells, i.e., one million). The content ranged from 7.78 pg in quiescence cells to 11.9 pg in growing cells. Accordingly, a log2 scaling factor was calculated: 0 h = 0; 1 h = 0.1; 2 h = 0.194; 4 h = 0.199; 6 h = 0.313; 8 h = 0.433; 10 h = 0.513; 12 h = 0.455. Serum-regulated miRNAs were then identified by normalizing single-cell RPM values over the 0 h sample and selecting those miRNAs that were regulated by ± 0.5 log2FC (12 h).

**pri-miRNA and mRNA RTqPCR expression analysis**

Primary transcripts of miRNAs (pri-miRNAs) were evaluated by quantitative PCR on 4sU-labeled or total RNA. RT-qPCR was performed on equal volumes of 4sU-labeled samples by using SuperScript® VILO cDNA Synthesis Kit (Life Technologies cat.no. 11754050) and Fast SYBR green master mix (Life Technologies). When total RNA was used, 25 ng of cDNA were used as the input for the detection of pri-miRNAs and 5 ng for the detection of mRNAs. Primer pairs were designed through computer assisted primer design software (Primer3) preferentially within 500 bp upstream of the sequence of the mature miRNA according to UCSC genome. The complete list of primers used in this study is shown in below.

|  | **FORWARD** | **REVERSE** |
| --- | --- | --- |
| *pri-mir-100-let7a* | TGCCACAAACCCGTAGATCC | AGGGCAGGAGAAGGTGTACT |
| *pri-let7b-let7c2* | TGGGGCATAGCGATGAAAAC | TGTGAGCACAGGTCTGATATGG |
| *pri-mir-155* | AAGGCCTGTTACTAGCACTCAC | AGGGTGACTCTTGGACTTGTC |
| *pri-mir-15a-16* | GGCTTTGAAAGATGTGCTGCTC | CGAGAAAAGCAAGTCATTTTCCC |
| *pri-mir-34a* | AGGACTTCGGAAGCTCTTCTG | AACTTCTCCCAGCCAAAAGC |
| *pri-mir-503* | AAGTTTCGGTTAGCCTGCAG | AAGTGAGGCGCTAACAACAC |
| *pri-mir-26a-1* | TTTGCCTGTAGCCAAGCTTG | CCTGCTTTGCTCATAACACTCG |
| *pri-mir-182* | TCGACCTCTTCTCGGTGAAAAG | AAGCTTAGGATTCCCACCATCC |
| *pri-mir-92a-1* | TCTATTGCTTTCGTTGGTGTG | CTAAATCCAGCGAGCAAACA |
| *pri-mir-miR-30b-30d* | ATCACCATGCCCAGCTAAAG | TTCTGAATCAAAATATTGGTATCATCT |
| *pri-mir-miR-335* | TCATGGGTTATAGCCAGTCGAG | GTCTGGGAAAGAACAACAAGCC |
| *pri-mir-24-1* | TGCCTTGAGCAGTGAGAATG | CACCTCACAATCCTGGGTCT |
| *Myc* | TTTTTGTCTATTTGGGGACA | CATCGTCGTGGCCTGTCTG |
| *Ccne2* | AACCCAGATAATTCAGGCCAAG | CAGTACAGGTGGCCAACAATTC |
| *Gapdh* | CGTATTGGGCGCCTGGTCAC | ATGATGACCCTTTTGGCTCC |
| *Rplp0* | TTCATTGTGGGAGCAGAC | CAGCAGTTTCTCCAGAGC |
| *Fosb* | CGACTTCAGGCGGAAACTGAT | TTTTGCAGCTCGGCGATCT |
| *Uhrf1* | GGCAGGCATCCATGGCCGGAGC | AGAGGCAACGGGGGCTGGAGAGG |
| *Mcm6* | CCACAATCTCTGCACGAGCC | CCCCACGAAGAGAGGTTCC |

**Determination of pri-miRNA synthesis rate by INSPEcT**

The R/Bioconductor software INSPEcT was used to infer synthesis rates based on RNA- and 4sU-seq data (de Pretis et al., 2015). RNA-seq data coming from the two experimental conditions (Growing 3T9 fibroblasts – GW, and Serum Stimulation of quiescent 3T9 fibroblasts) were used. In growing conditions (GW), data are from biological triplicates (both the 4sU-labeled and total RNA), while for Serum Stimulation (SS), a time course was performed including 10 different time points. In the analysis step, the “degDuringPulse” option was not used, since the length of the 4sU pulse used to label newly synthesized transcripts was shorter than the median half-life of transcripts calculated by similar studies where 4sU-tagging was used (10 min *vs.* 30 min; (Rabani et al., 2011). Read counts from Total RNA-seq experiments were inter-sample normalized using “glm analysis” of edgeR R/Bioconductor package. Read counts from 4sU-seq experiments were scaled within the INSPEcT package, following an optimization process that takes into account the calculation of the processing rates genome-wide. RPKMs were calculated from RNA-seq and 4sU-seq experiments by dividing read counts by the length of the feature they are assigned to (expressed in Kb) and by a pseudo-library size (expressed in Mb) that represents the average coverage of the RNA- or 4sU-seq experiment in all experimental conditions. Pseudo-library size is used instead of the real library size to maintain the normalization strategy implemented by the “glm fit” of edgeR, as previously described (de Pretis et al., 2015). The pseudo-library sizes used were the following: 4sU-seq - GW = 52394638; RNA-seq - GW = 67071416; 4sU-seq - SS = 70754530; RNA-seq - SS = 80094546. Detailed data of miRNA loci and synthesis rates are reported in **Supplemental** **Table S2**. The NCBI GEO accession number for nascent and total RNA-seq data of 3T9 cells is GSE51011.

**miRNA target analysis**

miRNA targets were downloaded from TargetScan 6.2. High confidence targets were selected according to previously identified criteria (Marzi et al., 2012) and outlined in **Fig. 4A**. Mouse predictions referring to 8mers and 7mer-m8 with a context score (CS) < -0.2 were considered, while the other predictions were filtered out. Both the Conserved (CS) and Nonconserved (NCS) sites were used. Of the different mRNA isoforms present for the same gene, only the longest was considered. These seed-containing targets were referred to as ‘seed’ target genes (TG_seed). Targets were also classified according to the 3’-end pairing contribution, a feature that measures the presence of additional binding sites (in addition to the seed region) located at the 3’end of the miRNA. These targets containing 3’end compensatory regions were referred to as ‘3C’ target genes (TG_3C). For ‘3C’ target genes, predictions with CS > -0.1 were excluded. These targets were further distinguished according to strength of 3’-end pairing in: a) targets with 3C binding < -0.03 (3C.03), and b) targets with 3C binding < -0.05 (3C.05). Examples are shown in **Fig. 4B**. To select only those targets expressed in 3T9 mouse fibroblasts, the target lists (‘seed’, ‘3C.03’ and ‘3C.05’) were crossed with RNA-seq dataset (growing cells and serum-stimulated cells). Genes with FPKM values < 1 were considered as ‘not expressed’ and, thus, excluded. To calculate Target:miRNA ratios (TPM), FPKM values were converted into copies per cell (CPC) with the same strategy used for pri-miRNAs, which relies on absolute quantification of gene expression by droplet digital PCR (ddPCR). Detailed data on TPM values and TPM classes are reported in **Supplemental** **Table S3**.

**Droplet digital PCR**

Droplet digital PCR (ddPCR) was performed using the QX200 Droplet Digital PCR system (Bio-Rad) with the QX200 EvaGreen ddPCR supermix. Mature miRNA detection by ddPCR was tested both with miScript system (Qiagen) and the miRCURY LNA system (Exiqon), with only the latter producing a specific digital response. As further controls, we measured miR-34a (LNA PCR primer set: 204486), which is expressed at low levels in wild-type 3T9 cells, as a) endogenous molecules, b) molecules induced upon doxycycline inducible expression (pSLIK-miR-34a). We evaluated the absolute copy number of miR-34a performing a linearity curve, using different amounts of cDNA (0.2/0.1/0.05/0.025 ng) as the input for the ddPCR. We estimated 231 ± 42 copies/ng (2.74 copies per cell, CPC) in wild-type cells and 12568±734 copies/ng (149.5 CPC) in the case of the exogenous expression upon doxycycline treatment. Comparing miR-34a expression by small-RNA sequencing with ddPCR data, we derived a normalization factor to convert small-RNA seq reads per million (RPM) into CPC, i.e., CPC= RPM/10.85.

Detection of pri-miRNAs is described in **Supplemental** **Fig. S3.** Digital PCR was performed with different amounts of input RNA (0.25 and 2 ng of 4sU-labeled RNA; 1.25 and 10 ng of total RNA), obtaining highly linear results from all the doses used as input. Copies/ng were converted into copies/cell by estimating the RNA content per cell from multiple experiments (11.9 pg for GW cells; 7.78 pg for SD cells) and the 4sU content per cell (6.3 fg for GW cells; 2.18 fg for SD cells).

Comparing pri-miRNA expression by RNA sequencing with ddPCR data, we derived a normalization factor to convert RNA-seq reads (RPKM) into CPC, i.e., CPC= RPKM/7.36.

AGO2 **RNA immunoprecipitation**

AGO2 RNA immunoprecipitation (AGO2-RIP) experiments were conducted with the Imprint RNA Immunoprecipitation Kit (Sigma-Aldrich), according to manufacturer’s instructions. Briefly, cells were grown to ~80% confluency. A total of 10 million cells were used for each RIP experiment. Cells were trypsinized, collected in a tube and washed twice with ice cold PBS. Cells were resuspended in 200 l of lysis buffer [mild lysis, protease inhibitor cocktail (PIC), ribonuclease inhibitor] and incubated on ice 15'. Cell debris was removed by centrifugation at 16,000g, 10 min at 4°C. A fraction (5%) supernatant was collected as ‘input’ and stored on ice or flash frozen, while the remainder was used for immunoprecipitation. For each RIP, 20 l of magnetic beads with Protein A were pre-cleared with 200 l of Wash Buffer on a magnetic stand and, then, mixed with 2.5 g of control antibody (rabbit Anti-Rat IgG) or Anti-AGO2 antibody (mouse monoclonal 2A8 clone by Sigma Aldrich - Cat. Num. SAB4800048) at RT with rotation for 30 min. 2.5 µg rat IgG or monoclonal Anti-AGO2 antibody were added to the magnetic beads. Samples were washed twice with 0.5 mL of wash buffer, before adding cell lysates (supernatant) and incubating samples at 4°C with rotation overnight. Samples were then separated with the magnetic stand, washed five times (0.5 ml wash buffer, each time) and, finally, resuspended in 0.2 ml of wash buffer. RNA extractions from RIP samples were performed with 0.6 ml (1:3 ratio) of TRIzol LS (Life Technologies; Cat. Num 10296-028). A fraction (1/5) of the AGO2-associated RNA and 1/5th of the input RNA (around 100,000 cells) were analyzed by small RNA sequencing. To calculate the fraction of miRNAs loaded onto AGO2, raw reads were normalized by the ratio of cells used to isolate the input and to perform the AGO2-IP (i.e., 95:5).

For western blot analysis, a fraction (5%, 10 l) of AGO2-RIP samples was resolved on SDS-PAGE (7.5% precast gel, Biorad), transferred onto nitrocellulose membranes with BioRad Trans-Blot turbo and stained with Anti AGO2 Ab (mouse monoclonal 2A8 clone).

**Inducible Expression (Tet-ON) of miRNAs**

Inducible expression of miRNAs was achieved using the pSLIK-Neo expression system (Addgene, plasmid #25735). Primary transcript miRNA sequences (i.e., *pri-mir-34a*, *pri-mir-182*) were sub-cloned from Lenti-miR microRNA precursors clones (System Biosciences) into pSLIK-Neo (Shin et al., 2006). Constructs were sequence verified and used for lentiviral production and stable infection of 3T9 mouse fibroblasts, as previously described (Follenzi and Naldini, 2002). Briefly, 293T cells were seeded approximately 24 h before transfection in a 15 cm plate and incubated at 37°C with 5% CO2. The following day, the cells were transfected with a third generation packaging system (pVSV, pMDLg/pRRE, pRSV-REV, pADV) and the appropriate transfer plasmid using calcium phosphate. The media was changed 14 h later, and 30 h later the cell supernatant containing the vector was passed through a 0.22 m filter, mixed to polybrene (8 g/mL, Sigma 107689) and used for 3T9 infection. The day after the infection, fibroblasts were subjected to neomycin selection (750 ng/ml) for one week and, then, treated with doxycycline at different concentrations to induce miRNA expression. Several doses of doxycycline were tested, from 1 ng/mL (ineffective) to 1 g/mL (data not shown).

***pri-mir-182* in pSLIK vector (5’🡪3’)**

CTCGAGACTAGTGAATTCGGGAGGTGGTCGTGGGGTGGGGGGGAGGTGGCTGGAGGGCAGGCAGGGCTTGAGGAGGTTTTACACTGGAACAGGACCATACAGGCCGAAGGACCATAGTCTGGACCTTGTGTTAACTGTGGGAAGAGCGCCCTCCTAAAACCACCCTAACTGCTTCTTCTTCAGCATAGGCTTACTGGTCTGGCTGCTGGAGGCCTCCCACCATTTTTGGCAATGGTAGAACTCACACCGGTAAGGTAATGGGACCCGGTGGTTCTAGACTTGCCAACTATGGTGTAAGTGCTGAGCTGCTGAAGGTCTGCACCGTGCCGGAACCTGCCGATCACCAGGAAGGAGAGGGGACTCCTGTCTCCAGACCACCAGGCAGTGGCAGAGGGTGGGCGCAGCTGGAAGTGACCCTTAATGTTTCCCTGCGCCCCCCTGAGGTCACAAGTCATGAAGTCGACCTCTTCTCGGTGAAAAGGACTTGGGATCCGCGGCCGCACGCGTTTAATTAAGAATTC

***pri-mir-34a* in pSLIK vector (5’🡪3’)**

GCCCTTATGGAGTCTTGCTAGTTGCCTGGGCTGGTCTTGAACTCCTGGCCTGAAGCGATCCTCCCACCTCGGCCTCCTGCATCCTTTCTTTCCTCCCCACATTTCCTTCTTATCAACAGGTGCTGGGGAGAGGCAGGACAGGCCTGTCCCCCGAGTCCCCTCCGGATGCCGTGGACCGGCCAGCTGTGAGTGTTTCTTTGGCAGTGTCTTAGCTGGTTGTTGTGAGCAATAGTAAGGAAGCAATCAGCAAGTATACTGCCCTAGAAGTGCTGCACGTTGTGGGGCCCAAGAGGGAAGATGAAGCGAGAGATGCCCAGACCAGTGGGAGACGCCAGGACTTCGGAAGCTCTTCTGCGCCACGGTGGGTGGTGAGGGCGGCTGGGAAAGTGAGCTCCAGGGCCCCAGGAGCAGCCTGCTCGTGGGTGCGGAAGGAAAAAGGCACAGGGGCTTGGTGTGGGCGGCTTTTGGCTGGGAGAAGTTTGCACGTA

**Mathematical modeling for miRNA production and time evolution**

Levels of miRNAs () could be formally expressed as the sum of three events: transcription, maturation and degradation (schematized in **Fig. 3A**). The transformation of pri-miRNAs () into mature miRNA () is described by the following reactions:

that can be written through the two coupled differential equations:

where k1 is the synthesis rate (transcription), k2 is the rate of transformation of the pri-miRNA into miRNA (maturation), k3 is the degradation rate and is the dilution by cell division (1/TD , cell doubling time). We modeled the switch-off of the pri-miRNA transcription (shown as dashed vertical lines in the figures) by setting k1 tozero at the associated time point.

These coupled equations were solved numerically for arbitrary parameters, through a fourth order Runge-Kutta algorithm implemented in C programming language. Examples of this solution varying the indicated parameters are shown in **Fig. 3K**, **Fig. S3D** and **Table S2**.

When both the pri-miRNA and miRNA are at steady-state (zone B of **Fig. 3A**), equations (1) and (2) are both equal to zero. Thus, we can obtain the values of the plateau and :

where the last approximation holds for k2>>. This formula was used to infer miRNA expression in **Fig. 3I-J** and to determine virtual TPM values in **Fig. 4G** (with T1/2= 24 h).

**Derivation of the incorporation rate *vs.* half-life relation**

The measurement of half-life by ‘pulse-chase’ could be modeled as zone C of **Fig. 3A**. In this interval the pri-miRNA has completely decayed, thus and thus eq. (2) becomes

a simple exponential decay whose solution is

where the decay rate value is

and it is related to the half-life HL through the relation .

Let us now assume that *k*1*,* *k*2 and *k*3 are constant during the whole experiment, that for the three hours of duration of the 4sU administration the miRNA does not have time to decay, and that cell division is negligible. It is thus reasonable to consider a simplified effective process describing miRNA biogenesis without any intermediate step, such as

that corresponds to the equation

whose solution is

Thus, at the plateau it will be , that together with equation (4) gives

Let us now notice that the synthesis rate *k1* is equal to the quantity of incorporated 4sU divided by the duration of the 4sU signal, hence, finally we can derive the relation shown in **Fig. 2H**

**SUPPLEMENTAL REFERENCES**

Burger, K., Muhl, B., Kellner, M., Rohrmoser, M., Gruber-Eber, A., Windhager, L., Friedel, C.C., Dolken, L., and Eick, D. (2013). 4-thiouridine inhibits rRNA synthesis and causes a nucleolar stress response. RNA Biol 10, 1623-1630.

de Pretis, S., Kress, T., Morelli, M.J., Melloni, G.E., Riva, L., Amati, B., and Pelizzola, M. (2015). INSPEcT: a computational tool to infer mRNA synthesis, processing and degradation dynamics from RNA- and 4sU-seq time course experiments. Bioinformatics.

Follenzi, A., and Naldini, L. (2002). Generation of HIV-1 derived lentiviral vectors. Methods in enzymology 346, 454-465.

Marzi, M.J., Puggioni, E.M., Dall'Olio, V., Bucci, G., Bernard, L., Bianchi, F., Crescenzi, M., Di Fiore, P.P., and Nicassio, F. (2012). Differentiation-associated microRNAs antagonize the Rb-E2F pathway to restrict proliferation. The Journal of cell biology 199, 77-95.

Muller, H., Marzi, M.J., and Nicassio, F. (2014). IsomiRage: From Functional Classification to Differential Expression of miRNA Isoforms. Front Bioeng Biotechnol 2, 38.

Rabani, M., Levin, J.Z., Fan, L., Adiconis, X., Raychowdhury, R., Garber, M., Gnirke, A., Nusbaum, C., Hacohen, N., Friedman, N., et al. (2011). Metabolic labeling of RNA uncovers principles of RNA production and degradation dynamics in mammalian cells. Nat Biotechnol 29, 436-442.

Shin, K.J., Wall, E.A., Zavzavadjian, J.R., Santat, L.A., Liu, J., Hwang, J.I., Rebres, R., Roach, T., Seaman, W., Simon, M.I., et al. (2006). A single lentiviral vector platform for microRNA-based conditional RNA interference and coordinated transgene expression. Proc Natl Acad Sci U S A 103, 13759-13764.
