# Supplementary material for: Degradation dynamics of microRNAs revealed by a novel pulse-chase approach
Source: HighWire-hosted journal article supplement (doi:10.1101/gr.198788.115), 2016-01-28
Supplement: TABLE_S1_Decay_rates.xlsx [file TABLE_S1_Decay_rates.xlsx]

## Sheet: Half Life 186 Canonical miRNAs
N	miRNA NAME (miRBase21)	only guide	guide vs. passenger	pairs	5p/3p quilibrium	Y0	Plateau	Half Life (FINAL)	Half Life (min)	Half Life (max)	R square	Decay class	4sU incorp. (%) EXP1	4sU incorp. (%) EXP2	4SU incorp. (%) EXP3	4sU incorp. (%) AVERAGE	4sU class (only guide)	Short name	Chr	START	END	STRAND	MIMAT	miR family Targetscan	Seed+m8	Mature Sequence (TS)	lenght	last base	miRNA NAME (only guide)	Intronic vs. Intergenic (only guide)	Families (>2 members)	Clusters (>2 members)	miRNA name (HS)	Perfectly conserve in human?	4sU incorp. (%) BJ cells	4sU incorp. (%) HeLa cells
1	mmu-let-7a-5p	yes	guide			0.938	= 0.0	13	9.13	22.6	0.88	OTHER	12.8847	16.881	15.1607	14.9755	1. High (1qtle)	let-7a-5p	chr9	41536732	41536753	+	MIMAT0000521_1	let-7/98/4458/4500	GAGGUAG	TGAGGTAGTAGGTTGTATAGTT	22	T	let-7a-5p	NO	Let-7	100-let-7a-2-125b-1	hsa-let-7a-5p	YES	9.36379	5.72098
2	mmu-let-7b-5p	yes	guide			0.96	= 0.0	8.69	6.5	13.1	0.927	FAST	11.4105	15.8623	20.3595	15.8774	1. High (1qtle)	let-7b-5p	chr15	85707325	85707346	+	MIMAT0000522	let-7/98/4458/4500	GAGGUAG	TGAGGTAGTAGGTTGTGTGGTT	22	T	let-7b-5p	NO	Let-7		hsa-let-7b-5p	YES	9.9327	5.23356
3	mmu-let-7c-5p	yes	guide			0.961	= 0.0	11.7	8.66	18	0.918	FAST	12.8191	15.2811	20.0502	16.0502	1. High (1qtle)	let-7c-5p	chr16	77599672	77599693	+	MIMAT0000523_1	let-7/98/4458/4500	GAGGUAG	TGAGGTAGTAGGTTGTATGGTT	22	T	let-7c-5p	amb	Let-7	99a-7c-1-125b	hsa-let-7c-5p	YES	9.50826	6.0773
4	mmu-let-7d-3p		pass	yes		0.996	= 0.0	46.6	27.2	>48	0.721	SLOW	5.11707	5.5721	6.72705	5.80541		let-7d-3p	chr13	48536024	48536045	-	MIMAT0000384	passenger		CTATACGACCTGCTGCCTTTCT	22	T
5	mmu-let-7d-5p	yes	guide	yes		0.906	= 0.0	14.6	9.31	34.3	0.796	OTHER	10.7519	9.06548	12.8859	10.9011	1. High (1qtle)	let-7d-5p	chr13	48536078	48536099	-	MIMAT0000383	let-7/98/4458/4500	GAGGUAG	AGAGGTAGTAGGTTGCATAGTT	22	T	let-7d-5p	NO	Let-7		hsa-let-7d-5p	YES	7.01366	4.68591
6	mmu-let-7e-3p		pass	yes		0.897	= 0.0	5.57	3.72	11.2	0.854	FAST	3.59238	3.0438	3.6792	3.43846		let-7e-3p	chr17	17830411	17830432	+	MIMAT0017016	passenger		CTATACGGCCTCCTAGCTTTCC	22	C				99b-let-7e-125a
7	mmu-let-7e-5p	yes	guide	yes		0.885	= 0.0	22.7	10.4	>48	0.464	OTHER	8.62964	8.07606	11.3029	9.3362	1. High (1qtle)	let-7e-5p	chr17	17830366	17830387	+	MIMAT0000524	let-7/98/4458/4500	GAGGUAG	TGAGGTAGGAGGTTGTATAGTT	22	T	let-7e-5p	NO	Let-7	99b-let-7e-125a	hsa-let-7e-5p	YES	7.03946	5.69296
8	mmu-let-7f-5p	yes	guide			0.897	= 0.0	19.1	11.1	>48	0.708	OTHER	11.6387	10.4379	10.0979	10.7248	1. High (1qtle)	let-7f-5p	chrX	151912353	151912374	+	MIMAT0000525_1	let-7/98/4458/4500	GAGGUAG	TGAGGTAGTAGATTGTATAGTT	22	T	let-7f-5p	amb	Let-7	let-7f-2-98	hsa-let-7f-5p	YES	6.53266	6.0383
9	mmu-let-7g-5p	yes	guide			0.885	= 0.0	12.3	7.84	28.7	0.802	OTHER	5.80696	10.0596	9.66031	8.50897	1. High (1qtle)	let-7g-5p	chr9	106178846	106178867	+	MIMAT0000121	let-7/98/4458/4500	GAGGUAG	TGAGGTAGTAGTTTGTACAGTT	22	T	let-7g-5p	YES	Let-7		hsa-let-7g-5p	YES	8.81831	5.56555
10	mmu-let-7i-5p	yes	guide			0.887	= 0.0	25.4	13.5	>48	0.621	OTHER	6.39842	5.80491	6.72575	6.30969	2. Mid (2qtle)	let-7i-5p	chr10	122985698	122985719	-	MIMAT0000122	let-7/98/4458/4500	GAGGUAG	TGAGGTAGTAGTTTGTGCTGTT	22	T	let-7i-5p	NO	Let-7		hsa-let-7i-5p	YES	5.01749	4.60898
11	mmu-miR-100-5p	yes	guide			0.994	= 0.0	7.93	6.53	10.1	0.971	FAST	6.33817	6.05805	3.72814	5.37479	2. Mid (2qtle)	miR-100-5p	chr9	41531437	41531458	+	MIMAT0000655	miR-99ab/100	ACCCGUA	AACCCGTAGATCCGAACTTGTG	22	G	miR-100-5p	NO	miR-99	100-let-7a-2-125b-1	hsa-miR-100-5p	YES	4.43368	4.25354
12	mmu-miR-101b-3p	yes	guide			0.882	= 0.0	20	9.72	>48	0.538	OTHER	0.778255	1.21647	2.28923	1.42799	4. VLow (4qtle)	miR-101b-3p	chr19	29135339	29135359	+	MIMAT0000616	miR-101/101ab	ACAGUAC	TACAGTACTGTGATAGCTGAA	21	A	miR-101b-3p	YES
13	mmu-miR-103-3p	yes	guide			0.963	= 0.0	13.4	11.2	16.6	0.974	FAST	3.36188	5.36619	5.70443	4.81083	2. Mid (2qtle)	miR-103-3p	chr2	131288103	131288125	+	MIMAT0000546_1	miR-103a/107/107ab	GCAGCAU	AGCAGCATTGTACAGGGCTATGA	23	A	miR-103-3p	YES	miR-103		hsa-miR-103a-3p	YES	3.85989	3.15887
14	mmu-miR-106b-3p		pass			0.896	= 0.0	14.5	8.42	>48	0.709	OTHER	6.12338	7.84818	6.69455	6.8887		miR-106b-3p	chr5	138165746	138165767	-	MIMAT0004582	passenger		CCGCACTGTGGGTACTTGCTGC	22	C				106b-93-25
15	mmu-miR-107-3p	yes	guide			0.878	= 0.0	27.8	10.5	>48	0.322	OTHER	3.69217	5.53778	6.53333	5.25443	2. Mid (2qtle)	miR-107-3p	chr19	34820700	34820722	-	MIMAT0000647	miR-103a/107/107ab	GCAGCAU	AGCAGCATTGTACAGGGCTATCA	23	A	miR-107-3p	YES	miR-103
16	mmu-miR-1191b-5p	yes	guide			0.768	= 0.0	29.1	6.64	>48	0.096	OTHER	3.29302	4.25222	3.54667	3.6973	3. Low (3qtle)	miR-1191b-5p	chr10	81416276	81416297	-	MIMAT0029866	NOT PRESENT		TCAGGCUACAGAGCGAGAACCT	21	T	miR-1191b-5p	YES
17	mmu-miR-1198-5p	yes	guide			0.875	= 0.0	17.1	9.69	>48	0.687	OTHER	4.84116	6.05765	8.34133	6.41338	2. Mid (2qtle)	miR-1198-5p	chrX	7807142	7807163	+	MIMAT0005859	miR-1198-5p	AUGUGUU	TATGTGTTCCTGGCTGGCTTGG	22	G	miR-1198-5p	YES
18	mmu-miR-1249-3p	yes	guide			1.03	= 0.0	10.6	7.77	16.5	0.92	FAST	9.04465	17.497	9.86553	12.1357	1. High (1qtle)	miR-1249-3p	chr15	84951545	84951566	-	MIMAT0010560	miR-1249	CGCCCUU	ACGCCCTTCCCCCCCTTCTTCA	22	A	miR-1249-3p	YES
19	mmu-miR-125a-3p		pass	yes		0.838	= 0.0	6.43	3.73	23.1	0.722	OTHER	9.08742	5.16642	5.9844	6.74608		miR-125a-3p	chr17	17830855	17830876	+	MIMAT0004528	miR-125a-3p/1554	CAGGUGA	ACAGGTGAGGTTCTTGGGAGCC	22	C				99b-let-7e-125a	hsa-miR-125a-3p	YES	10.7555	9.47812
20	mmu-miR-125a-5p	yes	guide	yes		0.967	= 0.0	26.8	18.4	>48	0.86	SLOW	3.37184	3.55191	4.76798	3.89725	3. Low (3qtle)	miR-125a-5p	chr17	17830817	17830840	+	MIMAT0000135	miR-125a-5p/125b-5p/351/670/4319	CCCUGAG	TCCCTGAGACCCTTTAACCTGTGA	24	A	miR-125a-5p	NO	miR-125	99b-let-7e-125a	hsa-miR-125a-5p	YES	4.61435	4.6836
21	mmu-miR-125b-1-3p		pass	yes		0.927	= 0.0	2.8	1.87	5.63	0.894	FAST	8.63733	6.14075	6.1234	6.96716		miR-125b-1-3p	chr9	41581980	41582001	+	MIMAT0004669	miR-125b-1-3p/125b-3p	CGGGUUA	ACGGGTTAGGCTCTTGGGAGCT	22	T				100-let-7a-2-125b-1
22	mmu-miR-125b-5p	yes	guide	yes		0.974	= 0.0	41.3	28	>48	0.853	SLOW	1.8809	2.57271	4.24758	2.9004	3. Low (3qtle)	miR-125b-5p	chr9	41581940	41581961	+	MIMAT0000136_1	miR-125a-5p/125b-5p/351/670/4319	CCCUGAG	TCCCTGAGACCCTAACTTGTGA	22	A	miR-125b-5p	YES	miR-125	100-let-7a-2-125b-1	hsa-miR-125b-5p	YES	4.43178	4.34887
23	mmu-miR-128-3p	yes	guide			0.959	= 0.0	21.1	14.1	42	0.842	OTHER	5.25357	4.02257	8.13248	5.80288	2. Mid (2qtle)	miR-128-3p	chr9	112118644	112118664	-	MIMAT0000140_1	miR-128/128ab	CACAGUG	TCACAGTGAACCGGTCTCTTT	21	T	miR-128-3p	YES			hsa-miR-128-3p	YES	3.84878	4.8683
24	mmu-miR-129-2-3p		pass	yes	yes	0.93	= 0.0	10.1	6.72	20.2	0.846	OTHER	3.0176	5.04096	5.61792	4.55883		miR-129-2-3p	chr2	94241376	94241397	-	MIMAT0000544	miR-129-3p/129ab-3p/129-1-3p/129-2-3p	AGCCCUU	AAGCCCTTACCCCAAAAAGCAT	22	T
25	mmu-miR-129-5p	yes	guide	yes		0.935	= 0.0	16.1	10.5	34.8	0.819	OTHER	3.34945	5.85066	5.45311	4.88441	2. Mid (2qtle)	miR-129-5p	chr6	29022624	29022644	+	MIMAT0000209_1	miR-129-5p/129ab-5p	UUUUUGC	CTTTTTGCGGTCTGGGCTTGC	21	C	miR-129-5p	NO
26	mmu-miR-130a-3p	yes	guide			0.937	= 0.0	42	15.2	>48	0.3	SLOW	0.562823	0.342594	1.49021	0.798542	4. VLow (4qtle)	miR-130a-3p	chr2	84741116	84741137	-	MIMAT0000141	miR-130ac/301ab/301b/301b-3p/454/721/4295/3666	AGUGCAA	CAGTGCAATGTTAAAAGGGCAT	22	T	miR-130a-3p	NO	miR-130		hsa-miR-130a-3p	YES	1.56074	0.903343
27	mmu-miR-130b-3p	yes	guide	yes		0.953	= 0.0	40.4	16.2	>48	0.381	SLOW	1.26953	1.1309	3.49734	1.96593	4. VLow (4qtle)	miR-130b-3p	chr16	17124071	17124092	-	MIMAT0000387	miR-130ac/301ab/301b/301b-3p/454/721/4295/3666	AGUGCAA	CAGTGCAATGATGAAAGGGCAT	22	T	miR-130b-3p	YES	miR-130	301b-130b	hsa-miR-130b-3p	YES	2.38433	3.22708
28	mmu-miR-130b-5p		pass	yes		0.908	= 0.0	28.4	15.9	>48	0.676	SLOW	5.12718	3.9869	3.55336	4.22248		miR-130b-5p	chr16	17124109	17124130	-	MIMAT0004583	passenger		ACTCTTTCCCTGTTGCACTACT	22	T				301b-130b
29	mmu-miR-132-3p	yes	guide			1.03	= 0.0	13.5	9.6	22.7	0.895	OTHER	5.71189	6.66432	10.4026	7.59292	1. High (1qtle)	miR-132-3p	chr11	75173723	75173744	+	MIMAT0000144	miR-132/212/212-3p	AACAGUC	TAACAGTCTACAGCCATGGTCG	22	G	miR-132-3p	NO			hsa-miR-132-3p	YES	5.49497	4.2031
30	mmu-miR-138-5p	yes	guide			0.943	= 0.0	11.8	7.5	28	0.808	OTHER	2.19699	2.67736	4.05421	2.97619	3. Low (3qtle)	miR-138-5p	chr9	122682898	122682920	+	MIMAT0000150_1	miR-138/138ab	GCUGGUG	AGCTGGTGTTGTGAATCAGGCCG	23	G	miR-138-5p	NO			hsa-miR-138-5p	YES	3.27114	3.25671
31	mmu-miR-140-3p	yes	guide	yes		0.912	= 0.0	7.78	5.61	12.6	0.906	FAST	5.62977	5.85432	4.35412	5.2794	2. Mid (2qtle)	miR-140-3p	chr8	107551288	107551308	+	MIMAT0000152	miR-140-3p	ACCACAG	TACCACAGGGTAGAACCACGG	21	G	miR-140-3p	NO
32	mmu-miR-140-5p		pass	yes		0.869	= 0.0	11.3	6.13	>48	0.656	OTHER	4.47855	4.12406	6.86664	5.15642		miR-140-5p	chr8	107551249	107551270	+	MIMAT0000151	miR-140/140-5p/876-3p/1244	AGUGGUU	CAGTGGTTTTACCCTATGGTAG	22	G
33	mmu-miR-143-3p	yes	guide	yes		0.917	= 0.0	11.8	7.9	23.2	0.85	OTHER	4.01684	6.00173	4.34945	4.78934	2. Mid (2qtle)	miR-143-3p	chr18	61649199	61649219	-	MIMAT0000247	miR-143/1721/4770	GAGAUGA	TGAGATGAAGCACTGTAGCTC	21	C	miR-143-3p	NO		143-145	hsa-miR-143-3p	YES	2.90442	3.46817
34	mmu-miR-143-5p		pass	yes		1.04	= 0.0	10.5	7.19	19.4	0.872	FAST	5.96969	4.50235	7.54353	6.00519		miR-143-5p					MIMAT0017006	passenger		GGTGCAGTGCTGCATCTCTGG		G
35	mmu-miR-145a-5p	yes	guide			1.04	= 0.0	13	8.63	26.3	0.851	OTHER	2.32417	4.81418	7.5116	4.88332	2. Mid (2qtle)	miR-145a-5p	chr18	61647866	61647888	-	MIMAT0000157	miR-145	UCCAGUU	GTCCAGTTTTCCCAGGAATCCCT	23	T	miR-145a-5p	NO		143-145
36	mmu-miR-146b-5p	yes	guide			0.822	= 0.0	24	8.84	>48	0.302	OTHER	11.9926	15.9449	8.15149	12.0297	1. High (1qtle)	miR-146b-5p	chr19	46342790	46342811	+	MIMAT0003475	miR-146ac/146b-5p	GAGAACU	TGAGAACTGAATTCCATAGGCT	22	T	miR-146b-5p	NO
37	mmu-miR-148a-3p	yes	guide	yes		0.886	= 0.0	10.7	6.61	27.7	0.78	OTHER	2.94855	4.07263	4.04183	3.68767	3. Low (3qtle)	miR-148a-3p	chr6	51269829	51269850	-	MIMAT0000516	miR-148ab-3p/152	CAGUGCA	TCAGTGCACTACAGAACTTTGT	22	T	miR-148a-3p	NO	miR-148		hsa-miR-148a-3p	YES	1.72554	2.17063
38	mmu-miR-148a-5p		pass	yes		0.76	= 0.0	18.9	5.74	>48	0.179	OTHER	3.9378	3.49154	2.22923	3.21952		miR-148a-5p	chr6	51269867	51269888	-	MIMAT0004617	passenger		AAAGTTCTGAGACACTCCGACT	22	T
39	mmu-miR-148b-3p	yes	guide	yes		0.843	= 0.0	>48	13.6	>48	0.081	OTHER	3.18117	2.745	3.92157	3.28258	3. Low (3qtle)	miR-148b-3p	chr15	103285185	103285206	+	MIMAT0000580	miR-148ab-3p/152	CAGUGCA	TCAGTGCATCACAGAACTTTGT	22	T	miR-148b-3p	YES	miR-148		hsa-miR-148b-3p	YES	1.83249	2.7665
40	mmu-miR-148b-5p		pass	yes		0.853	= 0.0	13.6	6.7	>48	0.543	OTHER	0.460653	0.244175	1.07213	0.592318		miR-148b-5p	chr15	103285148	103285171	+	MIMAT0017036	passenger		GAAGTTCTGTTATACACTCAGGCT	24	T
41	mmu-miR-149-5p	yes	guide			1.41	= 0.0	22.6	7.19	>48	0.255	OTHER	2.71317	9.32125	11.4711	7.83517	1. High (1qtle)	miR-149-5p	chr1	92850381	92850403	+	MIMAT0000159	miR-149	CUGGCUC	TCTGGCTCCGTGTCTTCACTCCC	23	C	miR-149-5p	YES			hsa-miR-149-5p	YES	7.33874	4.12317
42	mmu-miR-151-3p	yes	guide	yes	yes	0.918	= 0.0	27.9	14.6	>48	0.605	OTHER	3.40849	6.27622	4.34734	4.67735	3. Low (3qtle)	miR-151-3p	chr15	73254820	73254840	-	MIMAT0000161	miR-151-3p	UAGACUG	CTAGACTGAGGCTCCTTGAGG	21	G	miR-151-3p	YES
43	mmu-miR-151-5p		pass	yes	yes	0.888	= 0.0	14.9	9.08	40.9	0.76	OTHER	4.1768	3.74251	4.71101	4.21011		miR-151-5p	chr15	73254855	73254875	-	MIMAT0004536	miR-151-5p/151b	CGAGGAG	TCGAGGAGCTCACAGTCTAGT	21	T					hsa-miR-151a-5p	YES	4.37873	5.16429
44	mmu-miR-152-3p	yes	guide	yes		0.867	= 0.0	6.34	3.91	16.8	0.798	FAST	4.14	5.34	9.69756	6.39252	2. Mid (2qtle)	miR-152-3p	chr11	96850439	96850459	+	MIMAT0000162	miR-148ab-3p/152	CAGUGCA	TCAGTGCATGACAGAACTTGG	21	G	miR-152-3p	YES	miR-148
45	mmu-miR-152-5p		pass	yes		0.907	= 0.0	13.1	8.73	26.3	0.84	OTHER	2.04805	2.31039	2.43166	2.26337		miR-152-5p	chr11	96850400	96850423	+	MIMAT0016991	passenger		TAGGTTCTGTGATACACTCCGACT	24	T
46	mmu-miR-155-5p	yes	guide			1.03	= 0.0	12.3	9.41	17.6	0.939	FAST	7.50823	15.6682	17.2428	13.4731	1. High (1qtle)	miR-155-5p	chr16	84714143	84714165	+	MIMAT0000165	miR-155	UAAUGCU	TTAATGCTAATTGTGATAGGGGT	23	T	miR-155-5p	NO
47	mmu-miR-15a-5p	yes	guide			0.914	= 0.0	28.4	11.2	>48	0.363	OTHER	1.24918	1.13628	3.06975	1.8184	4. VLow (4qtle)	miR-15a-5p	chr14	61632075	61632096	-	MIMAT0000526	miR-15abc/16/16abc/195/322/424/497/1907	AGCAGCA	TAGCAGCACATAATGGTTTGTG	22	G	miR-15a-5p	NO	miR-15		hsa-miR-15a-5p	YES	1.86144	2.35542
48	mmu-miR-15b-5p	yes	guide			0.972	= 0.0	37.5	20.1	>48	0.638	SLOW	2.77272	4.11581	4.79909	3.89588	3. Low (3qtle)	miR-15b-5p	chr3	69009775	69009796	+	MIMAT0000124	miR-15abc/16/16abc/195/322/424/497/1907	AGCAGCA	TAGCAGCACATCATGGTTTACA	22	A	miR-15b-5p	YES	miR-15	15b-16-2	hsa-miR-15b-5p	YES	3.86341	4.48749
49	mmu-miR-16-5p	yes	guide			0.846	= 0.0	>48	15.7	>48	0.086	SLOW	3.52557	3.21231	3.97882	3.57223	3. Low (3qtle)	miR-16-5p	chr3	69009918	69009939	+	MIMAT0000527_1	miR-15abc/16/16abc/195/322/424/497/1907	AGCAGCA	TAGCAGCACGTAAATATTGGCG	22	G	miR-16-5p	amb	miR-15	15b-16-2	hsa-miR-16-5p	YES	4.00155	4.42574
50	mmu-miR-17-3p		pass	yes		0.884	= 0.0	10.5	6.55	26.7	0.785	OTHER	2.7841	2.82257	5.52	3.70889		miR-17-3p	chr14	115043721	115043742	+	MIMAT0000650	passenger		ACTGCAGTGAGGGCACTTGTAG	22	G				17...92a-1
51	mmu-miR-17-5p	yes	guide	yes		0.919	= 0.0	38.2	15.5	>48	0.384	SLOW	1.42925	2.08099	4.08457	2.5316	4. VLow (4qtle)	miR-17-5p	chr14	115043684	115043706	+	MIMAT0000649	miR-17/17-5p/20ab/20b-5p/93/106ab/427/518a-3p/519d	AAAGUGC	CAAAGTGCTTACAGTGCAGGTAG	23	G	miR-17-5p	NO	miR-17	17...92a-1	hsa-miR-17-5p	YES	2.69522	3.36491
52	mmu-miR-181a-1-3p		pass	yes		0.836	= 0.0	4.39	2.5	18.1	0.726	FAST	4.49246	3.13563	3.1004	3.57616		miR-181a-1-3p	chr1	137966508	137966529	+	MIMAT0000660	passenger		ACCATCGACCGTTGATTGTACC	22	C
53	mmu-miR-181a-5p	yes	guide	yes		0.939	= 0.0	26.3	16.5	>48	0.789	SLOW	3.34328	4.84123	3.96827	4.05093	3. Low (3qtle)	miR-181a-5p	chr2	38852741	38852763	+	MIMAT0000210_1	miR-181abcd/4262	ACAUUCA	AACATTCAACGCTGTCGGTGAGT	23	T	miR-181a-5p	NO	miR-181	181a-2-181b-2	hsa-miR-181a-5p	YES	2.86083	2.27058
54	mmu-miR-181b-5p	yes	guide			0.953	= 0.0	28.8	18.2	>48	0.794	SLOW	4.34793	6.63358	5.72676	5.56942	2. Mid (2qtle)	miR-181b-5p	chr2	38853845	38853867	+	MIMAT0000673_1	miR-181abcd/4262	ACAUUCA	AACATTCATTGCTGTCGGTGGGT	23	T	miR-181b-5p	NO	miR-181	181a-2-181b-2	hsa-miR-181b-5p	YES	5.27292	3.55349
55	mmu-miR-181c-3p		pass	yes		0.898	= 0.0	14.1	8.27	47.4	0.728	OTHER	3.14789	1.16982	3.0056	2.4411		miR-181c-3p	chr8	84178885	84178906	-	MIMAT0017068	passenger		ACCATCGACCGTTGAGTGGACC	22	C				181d-181c
56	mmu-miR-181c-5p	yes	guide	yes		0.842	= 0.0	45	12.3	>48	0.15	OTHER	0.882139	0.975838	1.20244	1.02014	4. VLow (4qtle)	miR-181c-5p	chr8	84178924	84178945	-	MIMAT0000674	miR-181abcd/4262	ACAUUCA	AACATTCAACCTGTCGGTGAGT	22	T	miR-181c-5p	NO	miR-181	181d-181c	hsa-miR-181c-5p	YES	0.939496	0.745839
57	mmu-miR-181d-5p	yes	guide			0.897	= 0.0	17.9	10.6	>48	0.729	OTHER	5.48671	5.68344	5.41004	5.52673	2. Mid (2qtle)	miR-181d-5p	chr8	84178759	84178781	-	MIMAT0004324	miR-181abcd/4262	ACAUUCA	AACATTCATTGTTGTCGGTGGGT	23	T	miR-181d-5p	NO	miR-181	181d-181c	hsa-miR-181d-5p	YES	5.38564	4.44518
58	mmu-miR-182-5p	yes	guide			0.944	= 0.0	9.05	6.66	14.1	0.918	FAST	4.09008	5.93377	8.3169	6.11358	2. Mid (2qtle)	miR-182-5p	chr6	30165962	30165986	-	MIMAT0000211	miR-182	UUGGCAA	TTTGGCAATGGTAGAACTCACACCG	25	G	miR-182-5p	NO		183-96-182
59	mmu-miR-183-5p	yes	guide			0.921	= 0.0	17.3	10.1	>48	0.718	OTHER	6.76901	5.42581	5.83541	6.01008	2. Mid (2qtle)	miR-183-5p	chr6	30169711	30169732	-	MIMAT0000212	miR-183	AUGGCAC	TATGGCACTGGTAGAATTCACT	22	T	miR-183-5p	NO		183-96-182
60	mmu-miR-1839-5p	yes	guide			0.907	= 0.0	11.9	7.96	23.6	0.847	OTHER	7.43417	14.952	9.63057	10.6722	1. High (1qtle)	miR-1839-5p	chr7	81529919	81529940	+	MIMAT0009456	miR-1348/1839/1839-5p/3927	AGGUAGA	AAGGTAGATAGAACAGGTCTTG	22	G	miR-1839-5p	YES
61	mmu-miR-1843b-5p	yes	guide			0.98	= 0.0	11.7	6.7	45.3	0.722	OTHER	6.13305	5.97237	4.50947	5.5383	2. Mid (2qtle)	miR-1843b-5p	chr1	159340362	159340382	+	MIMAT0019345	miR-1843b-5p	UGGAGGU	ATGGAGGTCTCTGTCTGACTT	21	T	miR-1843b-5p	YES
62	mmu-miR-186-5p	yes	guide			0.854	= 0.0	>48	>48	>48	0	SLOW	1.40106	1.40671	3.18106	1.99628	4. VLow (4qtle)	miR-186-5p	chr3	157544285	157544306	+	MIMAT0000215	miR-186	AAAGAAU	CAAAGAATTCTCCTTTTGGGCT	22	T	miR-186-5p	YES			hsa-miR-186-5p	YES	2.42019	2.51639
63	mmu-miR-18a-3p		pass			1.02	= 0.0	>48	>48	>48	0	SLOW	4.5799	6.24156	7.09818	5.97321		miR-18a-3p	chr14	115043908	115043929	+	MIMAT0004626	passenger		ACTGCCCTAAGTGCTCCTTCTG	22	G				17...92a-1
64	mmu-miR-191-5p	yes	guide			0.84	= 0.0	>48	14.7	>48	0.062	OTHER	4.06014	5.06485	4.56395	4.56298	3. Low (3qtle)	miR-191-5p	chr9	108568325	108568347	+	MIMAT0000221	miR-191	AACGGAA	CAACGGAATCCCAAAAGCAGCTG	23	G	miR-191-5p	NO		191-425	hsa-miR-191-5p	YES	4.54363	4.76083
65	mmu-miR-192-5p	yes	guide			0.848	= 0.0	>48	16.4	>48	0.063	SLOW	1.07612	2.07379	1.84718	1.6657	4. VLow (4qtle)	miR-192-5p	chr19	6264857	6264877	+	MIMAT0000517	miR-192/215	UGACCUA	CTGACCTATGAATTGACAGCC	21	C	miR-192-5p	YES		194-2-192	hsa-miR-192-5p	YES	2.53866	1.75948
66	mmu-miR-193a-3p	yes	guide			1.18	= 0.0	13.1	5.41	>48	0.435	OTHER	0.0715009	0.0460107	0.364777	0.160763	4. VLow (4qtle)	miR-193a-3p	chr11	79712009	79712030	+	MIMAT0000223	miR-193/193b/193a-3p	ACUGGCC	AACTGGCCTACAAAGTCCCAGT	22	T	miR-193a-3p	NO			hsa-miR-193a-3p	YES	0.26875	0.178824
67	mmu-miR-194-5p	yes	guide			1.07	= 0.0	33.5	10.5	>48	0.223	OTHER	0.863013	1.18203	1.56187	1.20231	4. VLow (4qtle)	miR-194-5p	chr19	6264658	6264679	+	MIMAT0000224_1	miR-194	GUAACAG	TGTAACAGCAACTCCATGTGGA	22	A	miR-194-5p	amb		194-2-192
68	mmu-miR-1964-3p	yes	guide			0.953	= 0.0	>48	36.8	>48	0.07	SLOW	4.75333	4.81902	5.65463	5.07566	2. Mid (2qtle)	miR-1964-3p	chr7	29773344	29773365	+	MIMAT0009437	miR-1964-3p	CGACUUC	CCGACTTCTGGGCTCCGGCTTT	22	T	miR-1964-3p	YES
69	mmu-miR-196b-5p	yes	guide			0.876	= 0.0	10.8	6.66	29	0.768	OTHER	9.14557	8.84562	11.6813	9.89083	1. High (1qtle)	miR-196b-5p	chr6	52230129	52230150	-	MIMAT0001081	miR-196abc	AGGUAGU	TAGGTAGTTTCCTGTTGTTGGG	22	G	miR-196b-5p	YES			hsa-miR-196b-5p	YES	8.24927	7.51245
70	mmu-miR-1983	yes	guide			1.04	= 0.0	43.8	28.4	>48	0.821	SLOW	2.91694	1.919	5.41829	3.41807	3. Low (3qtle)	miR-1983	chr13	21896930	21896950	-	MIMAT0009455	miR-412-3p/1983	UCACCUG	CTCACCTGGAGCATGTTTTCT	21	T	miR-1983	NO
71	mmu-miR-199a-3p	yes	guide	yes		0.898	= 0.0	9.59	6.5	18.3	0.859	FAST	4.82901	4.66768	9.31866	6.27178	2. Mid (2qtle)	miR-199a-5p	chr1	162217844	162217866	+	MIMAT0000230	miR-199ab-3p/3129-5p	CAGUAGU	ACAGTAGTCUGCACATTGGTTA		A	miR-199a-5p	amb		199a-214
72	mmu-miR-199a-5p		pass	yes		0.869	= 0.0	20.5	9.59	>48	0.483	OTHER	3.85307	1.62695	3.04717	2.8424		miR-199a-5p	chr9	21496537	21496559	-	MIMAT0000229_1	miR-199ab-5p	CCAGUGU	CCCAGTGTTCAGACTACCTGTTC	23	C
73	mmu-miR-19b-3p	yes	guide			1.03	= 0.0	>48	>48	>48	0	SLOW	0.191731	0.134841	0.601618	0.309397	4. VLow (4qtle)	miR-19b-3p	chrX	52741991	52742013	-	MIMAT0000513_1	miR-19ab	GUGCAAA	TGTGCAAATCCATGCAAAACTGA	23	A	miR-19b-3p	NO		106a...363	hsa-miR-19b-3p	YES	0.59635	0.573156
74	mmu-miR-205-5p	yes	guide			0.932	= 0.0	7.83	5.89	11.7	0.932	FAST	46.7554	18.2135	8.73939	24.5694	1. High (1qtle)	miR-205-5p	chr1	193507503	193507524	-	MIMAT0000238	miR-205/205ab	CCUUCAU	TCCTTCATTCCACCGGAGTCTG	22	G	miR-205-5p	NO
75	mmu-miR-20a-5p	yes	guide			1	= 0.0	42.2	18.6	>48	0.461	SLOW	1.12744	2.84775	4.39558	2.79026	4. VLow (4qtle)	miR-20a-5p	chr14	115044183	115044205	+	MIMAT0000529	miR-17/17-5p/20ab/20b-5p/93/106ab/427/518a-3p/519d	AAAGUGC	TAAAGTGCTTATAGTGCAGGTAG	23	G	miR-20a-5p	NO	miR-17	17...92a-1	hsa-miR-20a-5p	YES	3.93855	3.02139
76	mmu-miR-210-5p		pass			0.757	= 0.0	>48	7.73	>48	0.009	OTHER	1.96818	1.38551	2.22616	1.85995		miR-210-5p	chr7	141221445	141221466	-	MIMAT0017052	passenger		AGCCACTGCCCACCGCACACTG	22	G
77	mmu-miR-214-3p	yes	guide	yes		0.903	= 0.0	4.55	3.14	8.26	0.897	FAST	15.3971	14.3311	17.3703	15.6995	1. High (1qtle)	miR-214-3p	chr1	162223438	162223459	+	MIMAT0000661	miR-214/761/3619-5p	CAGCAGG	ACAGCAGGCACAGACAGGCAGT	22	T	miR-214-3p	NO		199a-214
78	mmu-miR-214-5p		pass	yes		0.877	= 0.0	13.1	7.55	>48	0.709	OTHER	3.9418	2.17119	5.83672	3.98324		miR-214-5p	chr1	162223397	162223418	+	MIMAT0004664	passenger		TGCCTGTCTACACTTGCTGTGC	22	C				199a-214
79	mmu-miR-218-5p	yes	guide			0.863	= 0.0	>48	17.6	>48	0.104	SLOW	2.5054	3.73171	6.64839	4.29517	3. Low (3qtle)	miR-218-5p	chr5	48223966	48223986	+	MIMAT0000663_1	miR-218/218a	UGUGCUU	TTGTGCTTGATCTAACCATGT	21	T	miR-218-5p	YES			hsa-miR-218-5p	YES	1.46084	2.7166
80	mmu-miR-219a-1-3p		ambigous			1.06	= 0.0	9.85	7.44	14.6	0.934	FAST	8.64205	13.9042	9.88981	10.812		miR-219a-1-3p	chr17	34025010	34025031	-	MIMAT0017055	passenger		AGAGTTGCGTCTGGACGTCCCG	22	G
81	mmu-miR-21a-5p	yes	guide			0.909	= 0.0	>48	35.9	>48	-0.002	SLOW	1.32661	2.40972	3.48934	2.40855	4. VLow (4qtle)	miR-21a-5p	chr11	86584120	86584141	-	MIMAT0000530	miR-21/590-5p	AGCUUAU	TAGCTTATCAGACTGATGTTGA	22	A	miR-21a-5p	NO			hsa-miR-21-5p	YES	1.58664	2.26877
82	mmu-miR-22-3p	yes	guide			0.906	= 0.0	28	14.2	>48	0.577	OTHER	0.849806	0.90173	1.53127	1.09427	4. VLow (4qtle)	miR-22-3p	chr11	75463772	75463793	+	MIMAT0000531	miR-22/22-3p	AGCUGCC	AAGCTGCCAGTTGAAGAACTGT	22	T	miR-22-3p	YES			hsa-miR-22-3p	YES	1.14601	1.26014
83	mmu-miR-221-3p	yes	guide	yes		1.02	= 0.0	16.3	13.4	20.9	0.966	OTHER	2.82968	6.47815	11.3897	6.89918	1. High (1qtle)	miR-221-3p	chrX	19146307	19146329	-	MIMAT0000669	miR-221/222/222ab/1928	GCUACAU	AGCTACATTGTCTGCTGGGTTTC	23	C	miR-221-3p	NO	miR-221	222-221	hsa-miR-221-3p	YES	6.26617	5.1356
84	mmu-miR-221-5p		pass	yes		0.909	= 0.0	4.56	3.29	7.44	0.918	FAST	5.29407	11.4164	9.48139	8.73062		miR-221-5p	chrX	19146344	19146369	-	MIMAT0017060	passenger		ACCTGGCATACAATGTAGATTTCTGT	26	T				222-221
85	mmu-miR-222-3p	yes	guide	yes		1.06	= 0.0	14.1	10.7	20.8	0.931	OTHER	4.4716	6.16412	7.38787	6.00787	2. Mid (2qtle)	miR-222-3p	chrX	19146903	19146923	-	MIMAT0000670	miR-221/222/222ab/1928	GCUACAU	AGCTACATCTGGCTACTGGGT	21	T	miR-222-3p	NO	miR-221	222-221	hsa-miR-222-3p	YES	5.00538	3.79503
86	mmu-miR-222-5p		pass	yes		0.912	= 0.0	>48	24.4	>48	-0.007	SLOW	2.90084	5.95633	5.69813	4.85177		miR-222-5p	chrX	19146940	19146960	-	MIMAT0017061	passenger		TCAGTAGCCAGTGTAGATCCT	21	T				222-221
87	mmu-miR-224-5p	yes	guide			0.926	= 0.0	9.23	6.36	16.8	0.872	FAST	5.17446	2.54623	3.4045	3.70839	3. Low (3qtle)	miR-224	chrX	72261031	72261112	-	MIMAT0000671	miR-224	AAGUCAC	TAAGTCACTAGTGGTTCCGTT		T	miR-224	YES
88	mmu-miR-23a-3p	yes	guide			0.908	= 0.0	22.7	12.7	>48	0.669	OTHER	3.51305	4.93748	5.29581	4.58211	3. Low (3qtle)	miR-23a-3p	chr8	84208563	84208583	+	MIMAT0000532	miR-23abc/23b-3p	UCACAUU	ATCACATTGCCAGGGATTTCC	21	C	miR-23a-3p	NO	miR-23	23a-27a-24-2	hsa-miR-23a-3p	YES	3.27656	3.45032
89	mmu-miR-23b-3p	yes	guide			0.929	= 0.0	13	8.92	23.8	0.865	OTHER	6.03971	6.46192	7.4813	6.66098	2. Mid (2qtle)	miR-23b-3p	chr13	63300529	63300549	+	MIMAT0000125	miR-23abc/23b-3p	UCACAUU	ATCACATTGCCAGGGATTACC	21	C	miR-23b-3p	YES	miR-23	23b-27b-24-1	hsa-miR-23b-3p	YES	3.22928	3.51664
90	mmu-miR-24-2-5p		pass	yes		0.935	= 0.0	7.06	5.37	10.3	0.938	FAST	1.28329	2.06226	2.77805	2.0412		miR-24-2-5p	chr8	84208839	84208860	+	MIMAT0005440	passenger		GTGCCTACTGAGCTGAAACAGT	22	T				23a-27a-24-2
91	mmu-miR-24-3p	yes	guide	yes		0.969	= 0.0	10.1	8.28	12.8	0.969	FAST	4.25179	10.503	8.03059	7.59513	1. High (1qtle)	miR-24-3p	chr8	84208875	84208896	+	MIMAT0000219_1	miR-24/24ab/24-3p	GGCUCAG	TGGCTCAGTTCAGCAGGAACAG	22	G	miR-24-3p	amb		23a-27a-24-2	hsa-miR-24-3p	YES	6.08615	6.09406
92	mmu-miR-25-3p	yes	guide	yes		0.951	= 0.0	>48	28.7	>48	0.371	SLOW	4.83799	6.59584	5.23655	5.55679	2. Mid (2qtle)	miR-25-3p	chr5	138165332	138165353	-	MIMAT0000652	miR-25/32/92abc/363/363-3p/367	AUUGCAC	CATTGCACTTGTCTCGGTCTGA	22	A	miR-25-3p	YES	miR-25	106b-93-25	hsa-miR-25-3p	YES	4.54549	4.04603
93	mmu-miR-25-5p		pass	yes		0.875	= 0.0	17.5	8.41	>48	0.51	OTHER	5.61236	5.26173	6.5914	5.82183		miR-25-5p	chr5	138165370	138165391	-	MIMAT0017049	passenger		AGGCGGAGACTTGGGCAATTGC	22	C				106b-93-25
94	mmu-miR-26a-5p	yes	guide			0.863	= 0.0	12.2	7.04	45.3	0.704	OTHER	6.22891	4.61538	5.07455	5.30628	2. Mid (2qtle)	miR-26a-5p	chr9	119031811	119031832	+	MIMAT0000533_1	miR-26ab/1297/4465	UCAAGUA	TTCAAGTAATCCAGGATAGGCT	22	T	miR-26a-5p	YES	miR-26		hsa-miR-26a-5p	YES	4.36333	5.02589
95	mmu-miR-26b-3p		pass	yes		0.731	= 0.0	7.55	3.19	>48	0.369	OTHER	6.37429	8.66122	5.22439	6.7533		miR-26b-3p	chr1	74394360	74394381	+	MIMAT0004630	passenger		CCTGTTCTCCATTACTTGGCTC	22	C
96	mmu-miR-26b-5p	yes	guide	yes		0.872	= 0.0	9.43	5.79	25.4	0.772	OTHER	5.93852	9.27758	6.36363	7.19324	1. High (1qtle)	miR-26b-5p	chr1	74394324	74394344	+	MIMAT0000534	miR-26ab/1297/4465	UCAAGUA	TTCAAGTAATTCAGGATAGGT	21	T	miR-26b-5p	YES	miR-26		hsa-miR-26b-5p	YES	5.48267	6.34007
97	mmu-miR-27a-3p	yes	guide	yes		0.849	= 0.0	>48	14.4	>48	0.068	OTHER	1.03869	1.26261	2.10716	1.46949	4. VLow (4qtle)	miR-27a-3p	chr8	84208727	84208747	+	MIMAT0000537	miR-27abc/27a-3p	UCACAGU	TTCACAGTGGCTAAGTTCCGC	21	C	miR-27a-3p	NO	miR-27	23a-27a-24-2	hsa-miR-27a-3p	YES	1.49698	1.63549
98	mmu-miR-27a-5p		pass	yes		0.872	= 0.0	3.91	2.42	10.2	0.815	FAST	6.80339	7.99735	5.61805	6.80626		miR-27a-5p	chr8	84208685	84208706	+	MIMAT0004633	passenger		AGGGCTTAGCTGCTTGTGAGCA	22	A				23a-27a-24-2
99	mmu-miR-27b-3p	yes	guide	yes		0.84	= 0.0	21.9	9.34	>48	0.405	OTHER	3.5149	3.12436	4.29821	3.64582	3. Low (3qtle)	miR-27b-3p	chr13	63300760	63300780	+	MIMAT0000126	miR-27abc/27a-3p	UCACAGU	TTCACAGTGGCTAAGTTCTGC	21	C	miR-27b-3p	YES	miR-27	23b-27b-24-1	hsa-miR-27b-3p	YES	3.11558	3.81849
100	mmu-miR-27b-5p		pass	yes		0.903	= 0.0	8.23	5.79	14.2	0.886	FAST	7.10291	8.62178	6.6048	7.44316		miR-27b-5p	chr13	63300718	63300739	+	MIMAT0004522	passenger		AGAGCTTAGCTGATTGGTGAAC	22	C				23b-27b-24-1
101	mmu-miR-28a-3p		pass	yes		0.982	= 0.0	11.7	9.68	14.8	0.97	FAST	6.80145	11.3401	11.2408	9.79412		miR-28a-3p	chr16	24827908	24827929	+	MIMAT0004661	passenger		CACTAGATTGTGAGCTGCTGGA	22	A
102	mmu-miR-28a-5p	yes	guide	yes		0.903	= 0.0	14.9	9.75	31.6	0.826	OTHER	3.45108	3.04968	6.30072	4.26716	3. Low (3qtle)	miR-28a-5p	chr16	24827868	24827889	+	MIMAT0000653	miR-28-5p/708/1407/1653/3139	AGGAGCU	AAGGAGCTCACAGTCTATTGAG	22	G	miR-28a-5p	NO			hsa-miR-28-5p	YES	4.58966	4.89227
103	mmu-miR-296-5p	yes	guide		yes	0.941	= 0.0	14.9	10.9	23.5	0.91	OTHER	3.37204	3.94696	6.2687	4.52923	3. Low (3qtle)	miR-296-5p	chr2	174267093	174267113	-	MIMAT0000374	miR-296-5p	GGGCCCC	AGGGCCCCCCCTCAATCCTGT	21	T	miR-296-5p	NO		298-296
104	mmu-miR-298-5p	yes	guide			0.903	= 0.0	8.76	5.98	16.3	0.864	FAST	4.2052	4.20619	6.26295	4.89144	2. Mid (2qtle)	miR-298-5p	chr2	174267553	174267575	-	MIMAT0000376	miR-298/2347/2467-3p	GCAGAGG	GGCAGAGGAGGGCTGTTCTTCCC	23	C	miR-298-5p	NO		298-296
105	mmu-miR-29a-3p	yes	guide			0.909	= 0.0	31.3	16.2	>48	0.596	SLOW	1.78186	1.54607	4.77389	2.70061	4. VLow (4qtle)	miR-29a-3p	chr6	31062673	31062694	-	MIMAT0000535	miR-29abcd	AGCACCA	TAGCACCATCTGAAATCGGTTA	22	A	miR-29a-3p	NO	miR-29	29b-29a	hsa-miR-29a-3p	YES	2.08944	2.46888
106	mmu-miR-29b-3p	yes	guide			1.15	= 0.0	>48	>48	>48	0	SLOW	0.250904	0.181253	0.995718	0.475958	4. VLow (4qtle)	miR-29b-3p	chr6	31063025	31063047	-	MIMAT0000127_1	miR-29abcd	AGCACCA	TAGCACCATTTGAAATCAGTGTT	23	T	miR-29b-3p	NO	miR-29	29b-29a	hsa-miR-29b-3p	YES	0.635281	0.496574
107	mmu-miR-301a-3p	yes	guide	yes		1.8	= 0.0	>48	>48	>48	0	SLOW	0.10663	0.0424723	0.241	0.130034	4. VLow (4qtle)	miR-301a-3p	chr11	87113054	87113076	+	MIMAT0000379	miR-130ac/301ab/301b/301b-3p/454/721/4295/3666	AGUGCAA	CAGTGCAATAGTATTGTCAAAGC	23	C	miR-301a-3p	YES	miR-130
108	mmu-miR-301a-5p		pass	yes		0.872	= 0.0	4.26	2.68	10.4	0.823	FAST	5.64599	3.80943	7.31924	5.59155		miR-301a-5p	chr11	87113017	87113038	+	MIMAT0017008	passenger		GCTCTGACTTTATTGCACTACT	22	T
109	mmu-miR-301b-3p	yes	guide			1.07	= 0.0	>48	>48	>48	0	SLOW	0.383481	0.314503	0.878135	0.525373	4. VLow (4qtle)	miR-301b-3p	chr16	17124420	17124442	-	MIMAT0004186	miR-130ac/301ab/301b/301b-3p/454/721/4295/3666	AGUGCAA	CAGTGCAATGGTATTGTCAAAGC	23	C	miR-301b-3p	YES	miR-130	301b-130b
110	mmu-miR-3057-5p	yes	guide			1.03	= 0.0	21.1	14.4	39.8	0.861	OTHER	2.31549	6.58776	5.25956	4.72094	3. Low (3qtle)	miR-3057-5p	chr10	81271610	81271633	+	MIMAT0014822	miR-3057-5p	UUGGAGC	ATTGGAGCTGAGATTCTGCGGGAT	24	T	miR-3057-5p	YES
111	mmu-miR-3061-3p		ambigous		yes	1.33	= 0.0	>48	>48	>48	0	SLOW	2.10934	3.82934	2.38737	2.77535		miR-3061-3p	chr11	52126804	52126825	+	MIMAT0014829	miR-3061-3p	UACCUUU	CTACCTTTGATAGTCCACTGCC	22	C
112	mmu-miR-30a-3p		pass	yes		0.848	= 0.0	14.9	7.85	>48	0.613	OTHER	7.79623	9.78443	7.15314	8.2446		miR-30a-3p	chr1	23272315	23272336	+	MIMAT0000129	passenger		CTTTCAGTCGGATGTTTGCAGC	22	C				30a-30c-2
113	mmu-miR-30a-5p	yes	guide	yes		0.929	= 0.0	27.6	15.9	>48	0.708	SLOW	0.820433	1.40512	2.5235	1.58302	4. VLow (4qtle)	miR-30a-5p	chr1	23272274	23272295	+	MIMAT0000128	miR-30abcdef/30abe-5p/384-5p	GUAAACA	TGTAAACATCCTCGACTGGAAG	22	G	miR-30a-5p	NO	miR-30	30a-30c-2
114	mmu-miR-30b-3p		pass	yes		0.809	= 0.0	4.57	2.37	>48	0.609	OTHER	9.9673	11.7295	5.18566	8.96081		miR-30b-3p	chr15	68337431	68337452	-	MIMAT0004524	passenger		CTGGGATGTGGATGTTTACGTC	22	C				30d-30b
115	mmu-miR-30b-5p	yes	guide	yes		0.894	= 0.0	12.5	7.29	42.9	0.73	OTHER	1.14173	1.36192	3.00807	1.83724	4. VLow (4qtle)	miR-30b-5p	chr15	68337469	68337490	-	MIMAT0000130	miR-30abcdef/30abe-5p/384-5p	GUAAACA	TGTAAACATCCTACACTCAGCT	22	T	miR-30b-5p	NO	miR-30	30d-30b	hsa-miR-30b-5p	YES	2.22223	1.96264
116	mmu-miR-30c-1-3p		pass	yes		0.793	= 0.0	12.4	5.74	>48	0.464	OTHER	3.85653	4.27798	5.25176	4.46209		miR-30c-1-3p	chr4	120769546	120769567	-	MIMAT0004616	passenger		CTGGGAGAGGGTTGTTTACTCC	22	C
117	mmu-miR-30c-2-3p		pass	yes		0.822	= 0.0	5.89	3.32	25.9	0.699	OTHER	7.39721	6.89032	8.84258	7.71004		miR-30c-2-3p	chr1	23291754	23291775	+	MIMAT0005438	passenger		CTGGGAGAAGGCTGTTTACTCT	22	T				30a-30c-2
118	mmu-miR-30c-5p	yes	guide	yes		0.89	= 0.0	16.2	8.99	>48	0.668	OTHER	2.36849	2.2156	4.36512	2.98307	3. Low (3qtle)	miR-30c-5p	chr1	23291714	23291736	+	MIMAT0000514	miR-30abcdef/30abe-5p/384-5p	GUAAACA	TGTAAACATCCTACACTCTCAGC	23	C	miR-30c-5p	amb	miR-30	30a-30c-2	hsa-miR-30c-5p	YES	3.43392	3.22621
119	mmu-miR-30d-3p		pass	yes		0.83	= 0.0	3.64	1.84	>48	0.587	OTHER	4.21198	2.14906	3.52029	3.29378		miR-30d-3p	chr15	68341217	68341238	-	MIMAT0017011	passenger		CTTTCAGTCAGATGTTTGCTGC	22	C				30d-30b
120	mmu-miR-30d-5p	yes	guide	yes		0.892	= 0.0	15.7	9.74	40.9	0.772	OTHER	3.13845	3.58252	4.05726	3.59274	3. Low (3qtle)	miR-30d-5p	chr15	68341257	68341278	-	MIMAT0000515	miR-30abcdef/30abe-5p/384-5p	GUAAACA	TGTAAACATCCCCGACTGGAAG	22	G	miR-30d-5p	NO	miR-30	30d-30b	hsa-miR-30d-5p	YES	2.90263	2.73231
121	mmu-miR-30e-3p		pass	yes		0.858	= 0.0	15.4	8.17	>48	0.615	OTHER	5.88983	9.02152	4.83961	6.58365		miR-30e-3p	chr4	120772618	120772639	-	MIMAT0000249	passenger		CTTTCAGTCGGATGTTTACAGC	22	C
122	mmu-miR-30e-5p	yes	guide	yes		0.91	= 0.0	>48	>48	>48	0	SLOW	0.274001	0.223224	0.698059	0.398428	4. VLow (4qtle)	miR-30e-5p	chr4	120772618	120772639	-	MIMAT0000248	miR-30abcdef/30abe-5p/384-5p	GUAAACA	TGTAAACAUCCTTGACTGGAAG	22	G	miR-30e-5p	YES	miR-30
123	mmu-miR-31-3p		pass	yes		0.976	= 0.0	19.2	8.72	>48	0.488	OTHER	1.25168	1.60831	4.92094	2.59364		miR-31-3p	chr4	88910577	88910599	-	MIMAT0004634	passenger		TGCTATGCCAACATATTGCCATC	23	C
124	mmu-miR-31-5p	yes	guide	yes		0.906	= 0.0	13.5	8.96	27	0.841	OTHER	6.33672	6.43735	8.64312	7.13906	1. High (1qtle)	miR-31-5p	chr4	88910614	88910635	-	MIMAT0000538	miR-31	GGCAAGA	AGGCAAGATGCTGGCATAGCTG	22	G	miR-31-5p	NO
125	mmu-miR-320-3p	yes	guide			0.929	= 0.0	9.94	7.41	15.1	0.921	FAST	10.6042	12.8824	14.4428	12.6432	1. High (1qtle)	miR-320-3p	chr14	70443557	70443578	+	MIMAT0000666	miR-320abcd/4429	AAAGCUG	AAAAGCTGGGTTGAGAGGGCGA	22	A	miR-320-3p	NO			hsa-miR-320a	YES	10.4651	7.4477
126	mmu-miR-322-3p		pass	yes		0.925	= 0.0	5.09	3.89	7.38	0.946	FAST	5.04798	3.63233	6.0298	4.90337		miR-322-3p	chrX	53054269	53054289	-	MIMAT0000549	passenger		AAACATGAAGCGCTGCAACAC	21	C				322...450ab
127	mmu-miR-322-5p	yes	guide	yes		0.866	= 0.0	10.6	6.37	31.9	0.747	OTHER	2.46605	1.61027	3.33115	2.46916	4. VLow (4qtle)	miR-322-5p	chrX	53054306	53054327	-	MIMAT0000548	miR-15abc/16/16abc/195/322/424/497/1907	AGCAGCA	CAGCAGCAATTCATGTTTTGGA	22	A	miR-322-5p	NO	miR-15	322...450ab
128	mmu-miR-324-3p		ambigous		yes	0.907	= 0.0	>48	16.9	>48	0.242	SLOW	3.50033	3.47618	6.60366	4.52672		miR-324-3p					MIMAT0000556	passenger		CCACTGCCCCAGGTGCTGCT	20	T
129	mmu-miR-328-3p	yes	guide			0.943	= 0.0	9.95	7.62	14.3	0.937	FAST	11.4325	12.2034	9.88324	11.1731	1. High (1qtle)	miR-328-3p	chr8	105308379	105308400	-	MIMAT0000565	miR-328a/328b-3p	UGGCCCU	CTGGCCCTCTCTGCCCTTCCGT	22	T	miR-328-3p	NO
130	mmu-miR-335-3p		pass	yes	yes	0.917	= 0.0	7.2	4.8	14.4	0.856	FAST	8.73707	7.49083	4.43897	6.88896		miR-335-3p	chr6	30741354	30741375	+	MIMAT0004704	miR-335-3p	UUUUCAU	TTTTTCATTATTGCTCCTGACC	22	C
131	mmu-miR-335-5p	yes	guide	yes	yes	0.945	= 0.0	4.66	3.53	6.85	0.947	FAST	7.31718	4.69992	5.854	5.95703	2. Mid (2qtle)	miR-335-5p	chr6	30741314	30741336	+	MIMAT0000766	miR-335/335-5p	CAAGAGC	TCAAGAGCAATAACGAAAAATGT	23	T	miR-335-5p	YES
132	mmu-miR-342-3p	yes	guide	yes		0.97	= 0.0	17.5	11.2	39.8	0.805	OTHER	3.59759	5.33779	6.78823	5.2412	2. Mid (2qtle)	miR-342-3p	chr12	108658680	108658702	+	MIMAT0000590	miR-342-3p	CUCACAC	TCTCACACAGAAATCGCACCCGT	23	T	miR-342-3p	YES
133	mmu-miR-342-5p		pass	yes		0.93	= 0.0	18.5	11.3	>48	0.759	OTHER	6.74292	4.79743	8.78631	6.77555		miR-342-5p					MIMAT0004653	passenger		AGGGGTGCTATCTGTGATTGAG	22	G
134	mmu-miR-344b-3p	yes	guide			0.832	= 0.0	10.9	5.72	>48	0.611	OTHER	1.48008	1.65118	2.93447	2.02191	4. VLow (4qtle)	miR-344b-3p	chr7	61790522	61790543	-	MIMAT0014926	miR-344b	AUUUAGC	CATTTAGCCAAAGCCTGACTGT	22	T	miR-344b-3p	NO		344b-344d
135	mmu-miR-344d-3p	yes	guide			0.925	= 0.0	15.9	9.37	>48	0.739	OTHER	1.40281	4.32496	3.87372	3.2005	3. Low (3qtle)	miR-344d-3p	chr7	61726256	61726277	-	MIMAT0014808_2	miR-410/344de/344b-1-3p	AUAUAAC	GATATAACCACTGCCAGACTGA	22	A	miR-344d-3p	NO		344b-344d
136	mmu-miR-34a-5p	yes	guide			0.899	= 0.0	>48	18.4	>48	0.264	SLOW	1.54173	1.98767	2.52	2.01647	4. VLow (4qtle)	miR-34a-5p	chr4	150068473	150068494	+	MIMAT0000542	miR-34ac/34bc-5p/449abc/449c-5p	GGCAGUG	TGGCAGTGTCTTAGCTGGTTGT	22	T	miR-34a-5p	NO	miR-34		hsa-miR-34a-5p	YES	1.81556	1.47011
137	mmu-miR-34c-5p	yes	guide			0.806	= 0.0	29.9	9.59	>48	0.213	OTHER	0.829498	1.12949	2.73617	1.56505	4. VLow (4qtle)	miR-34c-5p	chr9	51103076	51103098	-	MIMAT0000381	miR-34ac/34bc-5p/449abc/449c-5p	GGCAGUG	AGGCAGTGTAGTTAGCTGATTGC	23	C	miR-34c-5p	NO	miR-34
138	mmu-miR-350-5p		ambigous			1.02	= 0.0	20.1	9.99	>48	0.585	OTHER	1.09002	1.3938	3.42029	1.96804		miR-350-5p					MIMAT0017040	passenger		AAAGTGCATGCGCTTTGGG	19	G
139	mmu-miR-351-5p	yes	guide			0.819	= 0.0	12.7	5.63	>48	0.421	OTHER	3.26449	2.37026	2.28353	2.63943	4. VLow (4qtle)	miR-351-5p	chrX	53053315	53053338	-	MIMAT0000609	miR-125a-5p/125b-5p/351/670/4319	CCCUGAG	TCCCTGAGGAGCCCTTTGAGCCTG	24	G	miR-351-5p	NO	miR-125	322...450ab
140	mmu-miR-361-3p		pass	yes		1.03	= 0.0	17.3	12.3	29.3	0.89	OTHER	3.89812	5.36272	6.39115	5.21733		miR-361-3p	chrX	113074827	113074851	-	MIMAT0017075	passenger		TCCCCCAGGTGTGATTCTGATTTGT	25	T
141	mmu-miR-361-5p	yes	guide	yes		0.962	= 0.0	20.7	12.3	>48	0.742	OTHER	2.67549	2.91837	3.82102	3.13829	3. Low (3qtle)	miR-361-5p	chrX	113074867	113074888	-	MIMAT0000704	miR-361-5p	UAUCAGA	TTATCAGAATCTCCAGGGGTAC	22	C	miR-361-5p	YES			hsa-miR-361-5p	YES	3.62259	3.5563
142	mmu-miR-365-2-5p		pass	yes		1.19	= 0.0	13.4	7.25	>48	0.678	OTHER	3.70826	5.39742	9.71871	6.2748		miR-365-2-5p	chr11	79726428	79726450	+	MIMAT0017179	passenger		AGGGACTTTCAGGGGCAGCTGTG	23	G
143	mmu-miR-365-3p	yes	guide	yes		0.892	= 0.0	>48	20.6	>48	0.141	SLOW	2.35778	3.20191	3.81626	3.12532	3. Low (3qtle)	miR-365-3p	chr16	13453895	13453916	+	MIMAT0000711_1	miR-33a-3p/365/365-3p	AAUGCCC	TAATGCCCCTAAAAATCCTTAT	22	T	miR-365-3p	NO			hsa-miR-365a-3p	YES	2.96655	3.44654
144	mmu-miR-378a-3p	yes	guide			0.936	= 0.0	15.5	11.1	25.4	0.896	OTHER	1.96385	2.48659	4.23392	2.89478	3. Low (3qtle)	miR-378a-3p	chr18	61397838	61397858	-	MIMAT0003151	miR-378/422a/378bcdefhi	CUGGACU	ACTGGACTTGGAGTCAGAAGG	21	G	miR-378a-3p	YES
145	mmu-miR-421-3p	yes	guide			0.901	= 0.0	28.1	14.7	>48	0.603	OTHER	2.67022	2.53951	4.01975	3.07649	3. Low (3qtle)	miR-421-3p	chrX	103572930	103572952	-	MIMAT0004869	miR-421	UCAACAG	ATCAACAGACATTAATTGGGCGC	23	C	miR-421-3p	NO			hsa-miR-421	YES	3.95411	5.0135
146	mmu-miR-423-3p		pass	yes	yes	0.935	= 0.0	22.2	14.7	45.1	0.835	OTHER	4.70897	4.13157	6.07689	4.97247		miR-423-3p	chr11	77078086	77078108	-	MIMAT0003454	miR-423-3p	GCUCGGU	AGCTCGGTCTGAGGCCCCTCAGT	23	T					hsa-miR-423-3p	YES	4.78866	4.63925
147	mmu-miR-423-5p	yes	guide	yes	yes	0.948	= 0.0	35.5	19.7	>48	0.668	SLOW	4.89171	3.28397	5.08899	4.42156	3. Low (3qtle)	miR-423-5p	chr11	77078122	77078144	-	MIMAT0004825	miR-423a/423-5p/3184/3573-5p	GAGGGGC	TGAGGGGCAGAGAGCGAGACTTT	23	T	miR-423-5p	YES			hsa-miR-423-5p	YES	5.11889	5.64437
148	mmu-miR-425-5p	yes	guide			0.868	= 0.0	9.48	5.68	28.6	0.75	OTHER	2.36337	1.3075	3.49046	2.38711	4. VLow (4qtle)	miR-425-5p	chr9	108568789	108568811	+	MIMAT0004750	miR-425/425-5p/489	AUGACAC	AATGACACGATCACTCCCGTTGA	23	A	miR-425-5p	NO		191-425	hsa-miR-425-5p	YES	2.58	3.01428
149	mmu-miR-450b-5p	yes	guide			0.91	= 0.0	>48	14.2	>48	-0.011	OTHER	0.221219	0.318497	0.730039	0.423252	4. VLow (4qtle)	miR-450b-5p	chrX	53047997	53048078	-	MIMAT0003511	miR-450b-5p.m	UUUGCAG	TTTTGCAGTATGTTCCTGAATA	22	A	miR-450b-5p	NO		322...450ab
150	mmu-miR-466b-3p	yes	guide			0.906	= 0.0	5.07	3.52	9.06	0.891	FAST	9.64339	3.91299	10.0312	7.86254	1. High (1qtle)	miR-466b-3p	chr2				MIMAT0004876	miR-466bcp-3p	UACAUAC	ATACATACACGCACACATAAGA	22	A	miR-466b-3p	YES		467...669
151	mmu-miR-466h-5p	yes	guide			0.831	= 0.0	8.76	4.71	>48	0.627	OTHER	2.94427	2.60577	4.19134	3.24713	3. Low (3qtle)	miR-466h-5p	chr2				MIMAT0004884	miR-466h-5p/466j/466m-5p/669m-5p	GUGUGCA	TGTGTGCATGTGCTTGTGTGTA	22	A	miR-466h-5p	YES		467...669
152	mmu-miR-467c-5p	yes	guide			0.851	= 0.0	11.7	6.47	>48	0.653	OTHER	5.84928	3.20169	3.90545	4.31881	3. Low (3qtle)	miR-467c-5p	chr2	10473941	10473962	+	MIMAT0004885	miR-467cd/1420ef	AAGUGCG	TAAGTGCGTGCATGTATATGTG	22	G	miR-467c-5p	YES		467...669
153	mmu-miR-484	yes	guide			0.884	= 0.0	21.1	11	>48	0.603	OTHER	3.41433	2.95776	4.53358	3.63523	3. Low (3qtle)	miR-484	chr16	14159630	14159651	+	MIMAT0003127	miR-344a-5p/484/3155/3155b	CAGGCUC	TCAGGCTCAGTCCCCTCCCGAT	22	T	miR-484	NO			hsa-miR-484	YES	4.30932	3.70553
154	mmu-miR-486a-5p	yes	guide			1.06	= 0.0	26.1	12.5	>48	0.535	OTHER	3.01296	10.5756	4.93654	6.17504	2. Mid (2qtle)	miR-486b-5p	chr8	23142573	23142662	-	MIMAT0003130	miR-486-5p/3107	CCUGUAC	TCCTGTACTGAGCTGCCCCGAG	22	G	miR-486b-5p	YES			hsa-miR-486-5p	YES	4.59776	3.63447
155	mmu-miR-501-3p	yes	guide			1.02	= 0.0	7.93	6.66	9.79	0.977	FAST	20.5726	15.6288	8.40333	14.8682	1. High (1qtle)	miR-501-3p	chrX	7241270	7241291	-	MIMAT0003509	miR-501-3p/502-3p/500/502a	AUGCACC	AATGCACCCGGGCAAGGATTTG	22	G	miR-501-3p	YES		532...500
156	mmu-miR-532-5p	yes	guide			0.955	= 0.0	12.3	9.32	18	0.931	FAST	4.25189	4.61963	6.38486	5.08546	2. Mid (2qtle)	miR-532-5p	chrX	7248456	7248477	-	MIMAT0002889	miR-532-5p/511	AUGCCUU	CATGCCTTGAGTGTAGGACCGT	22	T	miR-532-5p	YES		532...500	hsa-miR-532-5p	YES	3.76322	3.07038
157	mmu-miR-574-3p	yes	guide	yes	yes	0.961	= 0.0	7.35	5.89	9.76	0.961	FAST	10.2627	7.57796	8.97441	8.93836	1. High (1qtle)	miR-574-3p	chr5	64970364	64970385	+	MIMAT0004894	miR-574-3p	ACGCUCA	CACGCTCATGCACACACCCACA	22	A	miR-574-3p	YES			hsa-miR-574-3p	YES	5.04568	6.07156
158	mmu-miR-574-5p		pass	yes	yes	0.98	= 0.0	4.84	4.03	6.07	0.978	FAST	15.4865	30.4694	22.5318	22.8292		miR-574-5p	chr5	64970328	64970350	+	MIMAT0004893	miR-574-5p	GAGUGUG	TGAGTGTGTGTGTGTGAGTGTGT	23	T					hsa-miR-574-5p	YES	14.9141	12.0402
159	mmu-miR-582-3p		ambigous			0.942	= 0.0	24	10	>48	0.419	OTHER	2.43317	2.70529	3.77445	2.97097		miR-582-3p					MIMAT0005292	passenger		TAACCTGTTGAACAACTGAAC	21	C
160	mmu-miR-652-3p	yes	guide			0.941	= 0.0	7.25	5.18	12.1	0.904	FAST	7.12517	10.0726	11.7043	9.63401	1. High (1qtle)	miR-652-3p	chrX	142739060	142739080	+	MIMAT0003711	miR-652	AUGGCGC	AATGGCGCCACTAGGGTTGTG	21	G	miR-652-3p	YES
161	mmu-miR-6539	yes	guide			1.18	= 0.0	8.38	5.24	20.9	0.821	OTHER	2.16699	8.16032	8.43153	6.25295	2. Mid (2qtle)	miR-6539	chr14	67859699	67859722	-	MIMAT0025584	NOT PRESENT		GCACAGTGATGAACTCUGAGGGCT		C	miR-6539	YES
162	mmu-miR-6540-5p	yes	guide			1.18	= 0.0	>48	>48	>48	0	SLOW	3.61351	3.14118	9.13129	5.29533	2. Mid (2qtle)	miR-6540-5p	chr16	42303425	42303446	-	MIMAT0025585	NOT PRESENT		CTAAGGCAGGCAGACTTCAGTG	22	G	miR-6540-5p	YES
163	mmu-miR-664-5p	yes	guide			0.978	= 0.0	13.8	9.89	22.7	0.902	OTHER	6.25653	8.38631	5.54738	6.73007	2. Mid (2qtle)	miR-664-5p	chr1	185242975	185243043	+	MIMAT0017353	NOT PRESENT		CTGGCTGGGGAAAATGACTGG	21	G	miR-664-5p	YES
164	mmu-miR-669a-5p		pass		yes	0.896	= 0.0	10.9	6.9	25.6	0.801	OTHER	5.29991	4.68592	12.5309	7.50558		miR-669a-5p	ambigous				MIMAT0003477	passenger		AGTTGTGTGTGCATGTTCATGTCT		T
165	mmu-miR-669c-5p	yes	guide			0.967	= 0.0	7.48	6	9.92	0.961	FAST	13.4775	21.4569	18.6286	17.8543	1. High (1qtle)	miR-669c-5p	chr2	10509319	10509340	+	MIMAT0003479	miR-669c	UAGUUGU	ATAGTTGTGTGTGGATGTGTGT	22	T	miR-669c-5p	YES		467...669
166	mmu-miR-671-3p		ambigous			0.864	= 0.0	4.94	3.12	11.9	0.817	FAST	7.85514	8.11619	4.41716	6.79617		miR-671-3p	chr5	24592171	24592191	+	MIMAT0004821	miR-671-3p	CCGGUUC	TCCGGTTCTCAGGGCTCCACC	21	C					hsa-miR-671-3p	YES	9.55266	5.88431
167	mmu-miR-674-3p		pass			0.968	= 0.0	18.1	15.3	22.1	0.976	OTHER	4.56746	3.35657	5.296	4.40668		miR-674-3p	chr2	117185186	117185207	+	MIMAT0003741	passenger		CACAGCTCCCATCTCAGAACAA	22	A
168	mmu-miR-676-3p	yes	guide			0.934	= 0.0	18.7	11.8	44.4	0.792	OTHER	13.0554	9.10941	11.0806	11.0818	1. High (1qtle)	miR-676-3p	chrX	100381151	100381171	+	MIMAT0003782	miR-676.m	CGUCCUG	CCGTCCTGAGGTTGTTGAGCT	21	T	miR-676-3p	YES
169	mmu-miR-6944-3p	yes	guide			0.882	= 0.0	>48	21.7	>48	0.043	SLOW	6.95023	6.32637	4.71898	5.99853	2. Mid (2qtle)	miR-6944-3p	chr13	55477681	55477703	-	MIMAT0027789	NOT PRESENT		TAACTCTTCCCTTGTGCCCTCAG	23	G	miR-6944-3p	YES
170	mmu-miR-702-3p		ambigous			1.05	= 0.0	45.7	18.7	>48	0.389	SLOW	1.16561	2.23447	4.03915	2.47974		miR-702-3p					MIMAT0003492	passenger		TGCCCACCCTTTACCCCGCTCC	22	C
171	mmu-miR-744-5p	yes	guide			1.05	= 0.0	13.9	9.91	23.5	0.895	OTHER	3.11322	6.71801	5.9645	5.26524	2. Mid (2qtle)	miR-744-5p	chr11	65734799	65734820	-	MIMAT0004187	miR-744/1716	GCGGGGC	TGCGGGGCTAGGGCTAACAGCA	22	A	miR-744-5p	YES			hsa-miR-744-5p	YES	5.63224	5.43301
172	mmu-miR-7a-5p	yes	guide			1.08	= 0.0	18.3	8.01	>48	0.472	OTHER	3.61149	19.1729	21.554	14.7795	1. High (1qtle)	miR-7a-5p	ambigous				MIMAT0000677	miR-7/7ab	GGAAGAC	TGGAAGACTAGTGATTTTGTTGT	23	T	miR-7a-5p	amb
173	mmu-miR-872-3p		pass	yes		0.907	= 0.0	14	9.09	30.2	0.817	OTHER	1.74336	1.58616	3.20482	2.17812		miR-872-3p	chr4	94665206	94665227	+	MIMAT0004935	passenger		TGAACTATTGCAGTAGCCTCCT	22	T
174	mmu-miR-872-5p	yes	guide	yes		0.871	= 0.0	23.9	10.6	>48	0.458	OTHER	1.16564	1.80555	3.7354	2.23553	4. VLow (4qtle)	miR-872-5p	chr4	94665167	94665187	+	MIMAT0004934	miR-872/1421acal	AGGUUAC	AAGGTTACTTGTTAGTTCAGG	21	G	miR-872-5p	YES
175	mmu-miR-877-5p	yes	guide			1.1	= 0.0	14	8.78	34.9	0.805	OTHER	7.16495	7.15926	8.93118	7.7518	1. High (1qtle)	miR-877-5p	chr17	35960795	35960814	-	MIMAT0004861	miR-877	UAGAGGA	GTAGAGGAGATGGCGCAGGG	20	G	miR-877-5p	YES
176	mmu-miR-92a-1-5p		pass	yes		0.983	= 0.0	1.9	1.42	2.89	0.966	FAST	2.48621	2.98472	2.91227	2.7944		miR-92a-1-5p	chr14	115044437	115044459	+	MIMAT0017066	passenger		AGGTTGGGATTTGTCGCAATGCT	23	T				17...92a-1
177	mmu-miR-92a-3p	yes	guide	yes		1	= 0.0	>48	>48	>48	0.489	SLOW	4.32286	6.26524	6.86408	5.81739	2. Mid (2qtle)	miR-92a-3p	chrX	52741854	52741874	-	MIMAT0000539_1	miR-25/32/92abc/363/363-3p/367	AUUGCAC	TATTGCACTTGTCCCGGCCTG	21	G	miR-92a-3p	NO	miR-25	106a...363
178	mmu-miR-92b-3p	yes	guide			0.826	= 0.0	35.4	7.99	>48	0.085	OTHER	3.34849	3.96499	3.56961	3.6277	3. Low (3qtle)	miR-92b-3p	chr3	89227126	89227147	-	MIMAT0004899	miR-25/32/92abc/363/363-3p/367	AUUGCAC	TATTGCACTCGTCCCGGCCTCC	22	C	miR-92b-3p	NO	miR-25
179	mmu-miR-93-3p		pass	yes		0.895	= 0.0	12.5	7.84	31.3	0.78	OTHER	4.39069	3.66548	6.69511	4.91709		miR-93-3p	chr5	138165536	138165557	-	MIMAT0004636	passenger		ACTGCTGAGCTAGCACTTCCCG	22	G				106b-93-25
180	mmu-miR-93-5p	yes	guide	yes		0.945	= 0.0	28	18.6	>48	0.838	SLOW	2.68737	3.66779	5.48436	3.94651	3. Low (3qtle)	miR-93-5p	chr5	138165574	138165596	-	MIMAT0000540	miR-17/17-5p/20ab/20b-5p/93/106ab/427/518a-3p/519d	AAAGUGC	CAAAGTGCTGTTCGTGCAGGTAG	23	G	miR-93-5p	YES	miR-17	106b-93-25
181	mmu-miR-96-5p	yes	guide			0.782	= 0.0	17.7	6.79	>48	0.307	OTHER	3.27791	1.61626	3.38991	2.76136	4. VLow (4qtle)	miR-96-5p	chr6	30169506	30169528	-	MIMAT0000541	miR-96/507/1271	UUGGCAC	TTTGGCACTAGCACATTTTTGCT	23	T	miR-96-5p	NO		183-96-182
182	mmu-miR-98-3p		pass	yes		0.821	= 0.0	>48	>48	>48	0	SLOW	0.775545	1.08758	1.92978	1.2643		miR-98-3p	chrX	151913287	151913308	+	MIMAT0017023	passenger		CTATACAACTTACTACTTTCCT	22	T				let-7f-2-98
183	mmu-miR-98-5p	yes	guide	yes		0.897	= 0.0	12.2	8.06	24.7	0.837	OTHER	7.48958	12.632	13.6134	11.245	1. High (1qtle)	miR-98-5p	chrX	151913229	151913250	+	MIMAT0000545	let-7/98/4458/4500	GAGGUAG	TGAGGTAGTAAGTTGTATTGTT	22	T	miR-98-5p	YES	Let-7	let-7f-2-98
184	mmu-miR-99a-5p	yes	guide			0.894	= 0.0	>48	>48	>48	0	SLOW	3.01734	2.39468	3.83137	3.08113	3. Low (3qtle)	miR-99a-5p	chr16	77598940	77598961	+	MIMAT0000131	miR-99ab/100	ACCCGUA	AACCCGTAGATCCGATCTTGTG	22	G	miR-99a-5p	NO	miR-99	99a-7c-1-125b
185	mmu-miR-99b-3p		pass	yes		0.913	= 0.0	10.9	7.48	19.8	0.867	FAST	5.28508	6.94679	7.61485	6.61557		miR-99b-3p	chr17	17830232	17830253	+	MIMAT0004525	passenger		CAAGCTCGTGTCTGTGGGTCCG	22	G				99b-let-7e-125a
186	mmu-miR-99b-5p	yes	guide	yes		0.993	= 0.0	10.9	9.65	12.7	0.987	FAST	8.86028	9.04522	4.04277	7.31609	1. High (1qtle)	miR-99b-5p	chr17	17830194	17830215	+	MIMAT0000132	miR-99ab/100	ACCCGUA	CACCCGTAGAACCGACCTTGCG	22	G	miR-99b-5p	NO	miR-99	99b-let-7e-125a

## Sheet: crossing with GUO NAR 2015
N	miRNA NAME (miRBase21)	Half Life (4sU pulse chase)	Decay class	Decay class (marzi_ghini)	DECAY CLASS (GUO)	GUO HL (4hrs)	GUO HL (12hrs)
74	mmu-miR-205-5p	7.83	FAST	FAST	FAST	3.022	8.146
31	mmu-miR-140-3p	7.78	FAST	FAST	FAST	8.493	8.346
58	mmu-miR-182-5p	9.05	FAST	FAST	FAST	8.564	48
36	mmu-miR-146b-5p	24	OTHER		FAST	9.067	48
62	mmu-miR-186-5p	>48	SLOW	SLOW	FAST	9.12	48
3	mmu-let-7c-5p	11.7	FAST	FAST	FAST	9.472	48
57	mmu-miR-181d-5p	17.9	OTHER		FAST	9.999	48
94	mmu-miR-26a-5p	12.2	OTHER		FAST	10.199	48
2	mmu-let-7b-5p	8.69	FAST	FAST	FAST	10.415	48
64	mmu-miR-191-5p	>48	OTHER		FAST	10.431	48
156	mmu-miR-532-5p	12.3	FAST	FAST	FAST	10.634	12.773
46	mmu-miR-155-5p	12.3	FAST	FAST	FAST	10.678	48
113	mmu-miR-30a-5p	27.6	SLOW	SLOW	FAST	10.886	48
65	mmu-miR-192-5p	>48	SLOW	SLOW	FAST	11.657	48
120	mmu-miR-30d-5p	15.7	OTHER		NON-FAST	13.791	48
54	mmu-miR-181b-5p	28.8	SLOW	SLOW	NON-FAST	14.217	22.165
10	mmu-let-7i-5p	25.4	OTHER		NON-FAST	15.577	48
178	mmu-miR-92b-3p	35.4	OTHER		NON-FAST	16.025	41.609
42	mmu-miR-151-3p	27.9	OTHER		NON-FAST	16.599	48
11	mmu-miR-100-5p	7.93	FAST	FAST	NON-FAST	16.85	48
122	mmu-miR-30e-5p	>48	SLOW	SLOW	NON-FAST	17.125	48
172	mmu-miR-7a-5p	18.3	OTHER		NON-FAST	18.194	11.166
177	mmu-miR-92a-3p	>48	SLOW	SLOW	NON-FAST	18.776	12.398
154	mmu-miR-486a-5p	26.1	OTHER		NON-FAST	22.927	48
29	mmu-miR-132-3p	13.5	OTHER		NON-FAST	26.166	39.381
69	mmu-miR-196b-5p	10.8	OTHER		NON-FAST	31.648	48
5	mmu-let-7d-5p	14.6	OTHER		NON-FAST	36.28	19.91
53	mmu-miR-181a-5p	26.3	SLOW	SLOW	NON-FAST	39.823	48
1	mmu-let-7a-5p	13	OTHER		NON-FAST	48	25.413
7	mmu-let-7e-5p	22.7	OTHER		NON-FAST	48	28.52
8	mmu-let-7f-5p	19.1	OTHER		NON-FAST	48	38.811
9	mmu-let-7g-5p	12.3	OTHER		NON-FAST	48	22.37
13	mmu-miR-103-3p	13.4	FAST	FAST	NON-FAST	48	27.702
15	mmu-miR-107-3p	27.8	OTHER		NON-FAST	48	13.85
20	mmu-miR-125a-5p	26.8	SLOW	SLOW	NON-FAST	48	48
22	mmu-miR-125b-5p	41.3	SLOW	SLOW	NON-FAST	48	48
23	mmu-miR-128-3p	21.1	OTHER		NON-FAST	48	10.646
26	mmu-miR-130a-3p	42	SLOW	SLOW	NON-FAST	48	48
27	mmu-miR-130b-3p	40.4	SLOW	SLOW	NON-FAST	48	36.693
37	mmu-miR-148a-3p	10.7	OTHER		NON-FAST	48	48
39	mmu-miR-148b-3p	>48	OTHER		NON-FAST	48	48
41	mmu-miR-149-5p	22.6	OTHER		NON-FAST	48	48
44	mmu-miR-152-3p	6.34	FAST	FAST	NON-FAST	48	48
47	mmu-miR-15a-5p	28.4	OTHER		NON-FAST	48	48
48	mmu-miR-15b-5p	37.5	SLOW	SLOW	NON-FAST	48	48
49	mmu-miR-16-5p	>48	SLOW	SLOW	NON-FAST	48	48
51	mmu-miR-17-5p	38.2	SLOW	SLOW	NON-FAST	48	48
56	mmu-miR-181c-5p	45	OTHER		NON-FAST	48	48
59	mmu-miR-183-5p	17.3	OTHER		NON-FAST	48	48
67	mmu-miR-194-5p	33.5	OTHER		NON-FAST	48	48
71	mmu-miR-199a-3p	9.59	FAST	FAST	NON-FAST	48	48
73	mmu-miR-19b-3p	>48	SLOW	SLOW	NON-FAST	48	30.548
75	mmu-miR-20a-5p	42.2	SLOW	SLOW	NON-FAST	48	27.327
77	mmu-miR-214-3p	4.55	FAST	FAST	NON-FAST	48	48
79	mmu-miR-218-5p	>48	SLOW	SLOW	NON-FAST	48	12.452
81	mmu-miR-21a-5p	>48	SLOW	SLOW	NON-FAST	48	48
82	mmu-miR-22-3p	28	OTHER		NON-FAST	48	48
83	mmu-miR-221-3p	16.3	OTHER		NON-FAST	48	12.911
85	mmu-miR-222-3p	14.1	OTHER		NON-FAST	48	48
88	mmu-miR-23a-3p	22.7	OTHER		NON-FAST	48	48
89	mmu-miR-23b-3p	13	OTHER		NON-FAST	48	48
91	mmu-miR-24-3p	10.1	FAST	FAST	NON-FAST	48	48
92	mmu-miR-25-3p	>48	SLOW	SLOW	NON-FAST	48	24.304
96	mmu-miR-26b-5p	9.43	OTHER		NON-FAST	48	39.563
97	mmu-miR-27a-3p	>48	OTHER		NON-FAST	48	48
99	mmu-miR-27b-3p	21.9	OTHER		NON-FAST	48	48
105	mmu-miR-29a-3p	31.3	SLOW	SLOW	NON-FAST	48	48
106	mmu-miR-29b-3p	>48	SLOW	SLOW	NON-FAST	48	48
115	mmu-miR-30b-5p	12.5	OTHER		NON-FAST	48	48
118	mmu-miR-30c-5p	16.2	OTHER		NON-FAST	48	48
124	mmu-miR-31-5p	13.5	OTHER		NON-FAST	48	48
125	mmu-miR-320-3p	9.94	FAST	FAST	NON-FAST	48	25.222
129	mmu-miR-328-3p	9.95	FAST	FAST	NON-FAST	48	48
131	mmu-miR-335-5p	4.66	FAST	FAST	NON-FAST	48	48
132	mmu-miR-342-3p	17.5	OTHER		NON-FAST	48	48
141	mmu-miR-361-5p	20.7	OTHER		NON-FAST	48	48
143	mmu-miR-365-3p	>48	SLOW	SLOW	NON-FAST	48	48
144	mmu-miR-378a-3p	15.5	OTHER		NON-FAST	48	33.606
145	mmu-miR-421-3p	28.1	OTHER		NON-FAST	48	48
147	mmu-miR-423-5p	35.5	SLOW	SLOW	NON-FAST	48	48
148	mmu-miR-425-5p	9.48	OTHER		NON-FAST	48	48
149	mmu-miR-450b-5p	>48	OTHER		NON-FAST	48	48
153	mmu-miR-484	21.1	OTHER		NON-FAST	48	48
157	mmu-miR-574-3p	7.35	FAST	FAST	NON-FAST	48	48
160	mmu-miR-652-3p	7.25	FAST	FAST	NON-FAST	48	48
171	mmu-miR-744-5p	13.9	OTHER		NON-FAST	48	48
175	mmu-miR-877-5p	14	OTHER		NON-FAST	48	48
180	mmu-miR-93-5p	28	SLOW	SLOW	NON-FAST	48	40.943
181	mmu-miR-96-5p	17.7	OTHER		NON-FAST	48	48
184	mmu-miR-99a-5p	>48	SLOW	SLOW	NON-FAST	48	29.332
186	mmu-miR-99b-5p	10.9	FAST	FAST	NON-FAST	48	48
4	mmu-let-7d-3p	46.6	SLOW
6	mmu-let-7e-3p	5.57	FAST
12	mmu-miR-101b-3p	20	OTHER
14	mmu-miR-106b-3p	14.5	OTHER
16	mmu-miR-1191b-5p	29.1	OTHER
17	mmu-miR-1198-5p	17.1	OTHER
18	mmu-miR-1249-3p	10.6	FAST
19	mmu-miR-125a-3p	6.43	OTHER
21	mmu-miR-125b-1-3p	2.8	FAST
24	mmu-miR-129-2-3p	10.1	OTHER
25	mmu-miR-129-5p	16.1	OTHER
28	mmu-miR-130b-5p	28.4	SLOW
30	mmu-miR-138-5p	11.8	OTHER
32	mmu-miR-140-5p	11.3	OTHER
33	mmu-miR-143-3p	11.8	OTHER
34	mmu-miR-143-5p	10.5	FAST
35	mmu-miR-145a-5p	13	OTHER
38	mmu-miR-148a-5p	18.9	OTHER
40	mmu-miR-148b-5p	13.6	OTHER
43	mmu-miR-151-5p	14.9	OTHER
45	mmu-miR-152-5p	13.1	OTHER
50	mmu-miR-17-3p	10.5	OTHER
52	mmu-miR-181a-1-3p	4.39	FAST
55	mmu-miR-181c-3p	14.1	OTHER
60	mmu-miR-1839-5p	11.9	OTHER
61	mmu-miR-1843b-5p	11.7	OTHER
63	mmu-miR-18a-3p	>48	SLOW
66	mmu-miR-193a-3p	13.1	OTHER
68	mmu-miR-1964-3p	>48	SLOW
70	mmu-miR-1983	43.8	SLOW
72	mmu-miR-199a-5p	20.5	OTHER
76	mmu-miR-210-5p	>48	OTHER
78	mmu-miR-214-5p	13.1	OTHER
80	mmu-miR-219a-1-3p	9.85	FAST
84	mmu-miR-221-5p	4.56	FAST
86	mmu-miR-222-5p	>48	SLOW
87	mmu-miR-224-5p	9.23	FAST
90	mmu-miR-24-2-5p	7.06	FAST
93	mmu-miR-25-5p	17.5	OTHER
95	mmu-miR-26b-3p	7.55	OTHER
98	mmu-miR-27a-5p	3.91	FAST
100	mmu-miR-27b-5p	8.23	FAST
101	mmu-miR-28a-3p	11.7	FAST
102	mmu-miR-28a-5p	14.9	OTHER
103	mmu-miR-296-5p	14.9	OTHER
104	mmu-miR-298-5p	8.76	FAST
107	mmu-miR-301a-3p	>48	SLOW
108	mmu-miR-301a-5p	4.26	FAST
109	mmu-miR-301b-3p	>48	SLOW
110	mmu-miR-3057-5p	21.1	OTHER
111	mmu-miR-3061-3p	>48	SLOW
112	mmu-miR-30a-3p	14.9	OTHER
114	mmu-miR-30b-3p	4.57	OTHER
116	mmu-miR-30c-1-3p	12.4	OTHER
117	mmu-miR-30c-2-3p	5.89	OTHER
119	mmu-miR-30d-3p	3.64	OTHER
121	mmu-miR-30e-3p	15.4	OTHER
123	mmu-miR-31-3p	19.2	OTHER
126	mmu-miR-322-3p	5.09	FAST
127	mmu-miR-322-5p	10.6	OTHER
128	mmu-miR-324-3p	>48	SLOW
130	mmu-miR-335-3p	7.2	FAST
133	mmu-miR-342-5p	18.5	OTHER
134	mmu-miR-344b-3p	10.9	OTHER
135	mmu-miR-344d-3p	15.9	OTHER
136	mmu-miR-34a-5p	>48	SLOW
137	mmu-miR-34c-5p	29.9	OTHER
138	mmu-miR-350-5p	20.1	OTHER
139	mmu-miR-351-5p	12.7	OTHER
140	mmu-miR-361-3p	17.3	OTHER
142	mmu-miR-365-2-5p	13.4	OTHER
146	mmu-miR-423-3p	22.2	OTHER
150	mmu-miR-466b-3p	5.07	FAST
151	mmu-miR-466h-5p	8.76	OTHER
152	mmu-miR-467c-5p	11.7	OTHER
155	mmu-miR-501-3p	7.93	FAST
158	mmu-miR-574-5p	4.84	FAST
159	mmu-miR-582-3p	24	OTHER
161	mmu-miR-6539	8.38	OTHER
162	mmu-miR-6540-5p	>48	SLOW
163	mmu-miR-664-5p	13.8	OTHER
164	mmu-miR-669a-5p	10.9	OTHER
165	mmu-miR-669c-5p	7.48	FAST
166	mmu-miR-671-3p	4.94	FAST
167	mmu-miR-674-3p	18.1	OTHER
168	mmu-miR-676-3p	18.7	OTHER
169	mmu-miR-6944-3p	>48	SLOW
170	mmu-miR-702-3p	45.7	SLOW
173	mmu-miR-872-3p	14	OTHER
174	mmu-miR-872-5p	23.9	OTHER
176	mmu-miR-92a-1-5p	1.9	FAST
179	mmu-miR-93-3p	12.5	OTHER
182	mmu-miR-98-3p	>48	SLOW
183	mmu-miR-98-5p	12.2	OTHER
185	mmu-miR-99b-3p	10.9	FAST
