# Supplementary material for: Degradation dynamics of microRNAs revealed by a novel pulse-chase approach
Source: HighWire-hosted journal article supplement (doi:10.1101/gr.198788.115), 2016-01-28
Supplement: TABLE_S2_synthesis.xlsx [file TABLE_S2_synthesis.xlsx]

## Sheet: Loci
miRNA NAME (miRBase21)	pri-miRNA region	signal	CONTEXT	comment	pri-miRNA_synthesis_tcA (rpkm/hour)	pri-miRNA_synthesis_tcB (rpkm/hour)	pri-miRNA_synthesis_tcC (rpkm/hour)	pri-miRNA_halflives_tcA (hours)	pri-miRNA_halflives_tcB (hours)	pri-miRNA_halflives_tcC (hours)	Average synthesis rate
mmu-let-7a-1	chr13:48,625,924-48,641,947	OK	intergenic	7a-1: cluster with let-7d, let-7f-1	52.194	61.825	56.13	0.004	0.005	0.008	56.7163
mmu-let-7a-2	chr9:41,335,847-41,347,232	LOW	intergenic	7a-2: cluster with miR-100	7.167	8.538	7.251	0.09	0.013	0.059	7.652
mmu-let-7b-5p	chr15:85,531,339-85,538,026	OK	intergenic	cluster with let7c-2	21.066	18.332	21.506	0.012	0.013	0.017	20.3013
mmu-let-7c-1-5p	chr16:77,598,016-77,601,268	LOW	intergenic	cluster with 99a	1.523	1.745	1.99	0.144	0.063	0.11	1.75267
mmu-let-7c-2-5p	chr15:85,531,339-85,538,026	OK	intergenic	cluster with let7b	21.066	18.332	21.506	0.012	0.013	0.017	20.3013
mmu-let-7d-5p	chr13:48,625,924-48,641,947	OK	intergenic	7a-1: cluster with let-7d, let-7f-1	52.194	61.825	56.13	0.004	0.005	0.008	56.7163
mmu-let-7e	chr17:17,964,516-17,980,285	OK	intergenic	cluster with let-7e, miR.125a	49.042	45.559	45.867	0.007	0.015	0.007	46.8227
mmu-let-7i	chr10:122,416,951-122,422,812	OK	intergenic	intergenic	17.196	19.707	18.172	0.042	0.012	0.027	18.3583
mmu-miR-100-5p	chr9:41,335,847-41,347,232	LOW	intergenic	clustered with let-7a-2	7.191	8.601	7.308	0.054	0.015	0.035	7.7
mmu-miR-103-1-3p	chr11:35,595,249-35,596,934	LOW	intronic	103-1; intron of Pank3	15.275	20.029	16.274	0.008	0.018	0.007	17.1927
mmu-miR-103-2-3p	chr2:131,113,466-131,117,939	LOW	intronic	103-2; intron of Pank2	4.343	4.953	4.443	0.028	0.024	0.027	4.57967
mmu-miR-106b-3p	chr5:138,606,439-138,607,121				18.516	18.753	17.932	0.006	0.031	0.007	18.4003
mmu-miR-1249-3p	chr15:84,781,388-84,783,468	LOW	intronic	intronic - 5031439G07Rik	4.598	3.958	4.163	0.115	0.053	0.127	4.23967
mmu-miR-125a-5p	chr17:17,964,516-17,980,285	OK	intergenic	cluster with let-7e, miR.125a	49.032	45.499	45.907	0.003	0.003	0.013	46.8127
mmu-miR-125b-1-5p	chr9:41,389,499-41,401,108	OK	intergenic	125b1	210.64	232.293	214.718	0.004	0.001	0.004	219.217
mmu-miR-125b-2-5p	chr16:77,644,837-77,652,946	LOW	intergenic	125b2	1.638	2.155	1.833	0.089	0.068	0.079	1.87533
mmu-miR-130a-3p	chr2:84,579,589-84,583,890	OK	intergenic	intergenic	10.413	12.322	12.078	0.016	0.013	0.013	11.6043
mmu-miR-130b-3p	chr16:17,121,721-17,125,215	LOW	intronic	intronic?- 2610318N02Rik; cluster with 301b	10.333	9.37	8.225	0.061	0.027	0.031	9.30933
mmu-miR-140-3p	chr8:110,074,092-110,076,142	OK	intronic	intronic - Wwp2	14.223	15.555	15.132	0.01	0.009	0.01	14.97
mmu-miR-143	chr18:61,805,240-61,812,027	OK	intergenic	cluster with miR-145	14.216	13.254	18.642	0.012	0.012	0.009	15.3707
mmu-miR-145	chr18:61,805,240-61,812,027	OK	intergenic	cluster with miR-143	14.216	13.254	18.642	0.012	0.012	0.009	15.3707
mmu-miR-149	chr1:94,728,790-94,749,806	LOW	intronic	intronic - Gpc1	2.971	2.161	2.222	0.053	0.072	0.07	2.45133
mmu-miR-151	chr15:73,073,258-73,087,275	OK	intronic	intronic - Ptk2	14.36	15.02	13.876	0.011	0.01	0.011	14.4187
mmu-miR-152-3p	chr11:96,711,402-96,711,970	LOW	intronic	intronic - COPZ2	1.021	2.877	4.097	0.139	0.049	0.035	2.665
mmu-miR-155-5p	chr16:84,703,710-84,719,727	OK	intergenic	intergenic	9.14	9.353	7.795	0.017	0.017	0.02	8.76267
mmu-miR-15a-5p	chr14:62,244,265-62,251,250	OK	intergenic	16-1: cluster with miR15a	24.029	29.269	27.162	0.009	0.004	0.004	26.82
mmu-miR-15b-5p	chr3:68,813,632-68,820,002	OK	intronic	intronic - Smc4; cluster with miR16-2	50.595	59.234	52.845	0.01	0.005	0.009	54.2247
mmu-miR-16-1-5p	chr14:62,244,265-62,251,250	OK	intergenic	16-1: cluster with miR15a	24.029	29.269	27.162	0.009	0.004	0.004	26.82
mmu-miR-16-2-5p	chr3:68,813,632-68,820,002	OK	intronic	16-2: intronic - Smc4; cluster with miR15b	50.704	59.372	52.944	0.002	0.002	0.006	54.34
mmu-miR-17-5p	chr14:115,441,507-115,446,111	OK	intergenic	cluster with 18, 19a, 19b-1, 20a, 92-1	55.178	52.603	50.136	0.002	0.005	0.007	52.639
mmu-miR-181a-1-5p	chr1:139,859,788-139,866,074	LOW	intergenic	miR-181a-1, cluster with 181b-1	3.789	5.629	4.179	0.031	0.021	0.028	4.53233
mmu-miR-181a-2-5p	chr2:38,707,091-38,711,257	LOW	antisense	miR-181a-2; cluster with 181b-2; antisense to Nr6a1	10.926	12.654	9.966	0.012	0.011	0.014	11.182
mmu-miR-181b-1-5p	chr1:139,859,788-139,866,074	LOW	intergenic	miR-181a-1, cluster with 181b	3.815	5.612	4.164	0.068	0.023	0.031	4.53033
mmu-miR-181b-2-5p	chr2:38,707,091-38,711,257	LOW	antisense	miR-181a-2; cluster with 181b-2; antisense to Nr6a1	10.926	12.654	9.966	0.012	0.011	0.014	11.182
mmu-miR-182-5p	chr6:30,115,777-30,124,226	LOW	intergenic	cluster with 182, 183, 96	3.833	4.043	3.928	0.036	0.034	0.035	3.93467
mmu-miR-183-5p	chr6:30,115,777-30,124,226	LOW	intergenic	cluster with 182, 183, 96	3.833	4.043	3.928	0.036	0.034	0.035	3.93467
mmu-miR-186-5p	chr3:157,206,290-157,207,891	OK	intronic	intronic - Zranb2	40.941	40.465	41.358	0.004	0.011	0.007	40.9213
mmu-miR-191-5p	chr9:108,469,867-108,472,159	LOW	intergenic	cluster with miR-425	3.167	1.725	2.49	0.044	0.162	0.112	2.46067
mmu-miR-192-5p	chr19:6,263,562-6,265,931	LOW	intergenic	cluster with miR-194	0.278	0.284	0.223	0.418	0.408	0.521	0.261667
mmu-miR-194-5p	chr19:6,263,562-6,265,931	LOW	intergenic	cluster with miR-192	0.278	0.284	0.223	0.418	0.408	0.521	0.261667
mmu-miR-1964-3p	chr7:30,556,560-30,560,300	LOW	intronic	intronic - Zfp84	5.833	5.639	4.948	0.021	0.066	0.025	5.47333
mmu-miR-1983	chr13:21,982,875-21,994,505	LOW	intergenic	intergenic	0.028	0.056	0.055	36.977	2.776	5.671	0.0463333
mmu-miR-199a-1-3p	chr9:21,299,241-21,303,566	OK	antisense	antisense to Dnm2	5.73815	4.68421	4.66518	0.0257287	0.0315176	0.0632924	5.02918
mmu-miR-199a-2-3p	chr1:164,147,835-164,155,141	OK	antisense	cluster with 214, antisense to Dnm3	55.2423	76.1695	60.684	0.0136055	0.0148012	0.0154818	64.0319
mmu-miR-19a	chr14:115,441,507-115,446,111	OK	intergenic	cluster with 18, 17, 19b-1, 20a, 92-1	55.479	52.886	50.695	0.028	0.034	0.028	53.02
mmu-miR-19b-1-3p	chr14:115,441,507-115,446,111	OK	intergenic	19b-1; cluster with 18, 19a, 17, 92a-1	55.178	52.603	50.136	0.002	0.005	0.007	52.639
mmu-miR-19b-2-3p	chrX:50,094,541-50,098,178	LOW	intergenic	19b-2; cluster with 92a-2, 20b, 18b, 106a, 363	0.018	0.018	0.018	6.907	6.742	6.886	0.018
mmu-miR-205-5p	chr1:195,333,484-195,335,975	LOW	intergenic	intergenic	0.026	0.027	0.026	5.82	5.68	5.802	0.0263333
mmu-miR-20a-5p	chr14:115,441,507-115,446,111	OK	intergenic	cluster with 18, 19a, 19b-1, 17, 92-1	55.432	52.901	50.519	0.012	0.024	0.013	52.9507
mmu-miR-214-3p	chr1:164,147,835-164,155,141	OK	antisense	cluster with 199a2, antisense to Dnm3	55.371	76.291	60.518	0.025	0.022	0.047	64.06
mmu-miR-218-1-5p	chr5:48,611,420-48,615,839	OK	intronic	miR218-1, intronic - Slit2	7.8	11.033	6.572	0.012	0.017	0.014	8.46833
mmu-miR-218-2-5p	chr11:35,426,233-35,435,462	LOW	intronic	miR218-2, intronic - Slit3	0.007	0.007	0.007	13.536	13.211	13.494	0.007
mmu-miR-21a-5p	chr11:86,390,826-86,398,796	OK	intergenic	intergenic (Vmp1 indep.promoter)	81.885	91.531	85.232	0.016	0.022	0.015	86.216
mmu-miR-22	chr11:75,275,206-75,279,977	OK	intergenic	intergenic	42.819	44.218	48.817	0.036	0.03	0.031	45.2847
mmu-miR-221	chrX:18,719,567-18,724,242	OK	intergenic	intergenic, clustered with miR-222	26.205	29.625	29.197	0.025	0.011	0.019	28.3423
mmu-miR-222	chrX:18,719,567-18,724,242	OK	intergenic	intergenic, clustered with miR-222	25.811	29.31	29.04	0.005	0.009	0.005	28.0537
mmu-miR-224-5p	chrX:69,503,958-69,507,750	LOW	intronic	intronic - Gabre, 452	1.774	2.325	1.797	0.071	0.054	0.07	1.96533
mmu-miR-23a-3p	chr8:86,730,722-86,733,993				21.245	22.136	23.778	0.005	0.004	0.008	22.3863
mmu-miR-23b-3p	chr13:63,401,071-63,403,087	OK	intronic	24-1: cluster with 23b, 27b; intronic - Apo	28.824	35.072	33.649	0.005	0.024	0.025	32.515
mmu-miR-24-1-3p	chr13:63,401,071-63,403,087	OK	intronic	24-1: cluster with 23b, 27b; intronic - Apo	28.392	34.815	33.693	0.032	0.031	0.014	32.3
mmu-miR-24-2-3p	chr8:86,730,722-86,733,993	OK	intergenic	24-2 cluster with 23a, 27a	21.245	22.136	23.778	0.005	0.004	0.008	22.3863
mmu-miR-25-3p	chr5:138,606,439-138,607,121	LOW	intronic	intronic - Mcm7; cluster with 93, 106b	18.498	18.952	17.812	0.086	0.039	0.055	18.4207
mmu-miR-26a-1-5p	chr9:118,939,430-118,942,619	LOW	intronic	26a-1: intronic - Ctdsp1	4.432	4.332	5.511	0.026	0.027	0.021	4.75833
mmu-miR-26a-2-5p	chr10:126,431,102-126,432,873	LOW	intronic	26a-2: intronic - Ctdsp2	5.289	4.727	4.741	0.023	0.026	0.026	4.919
mmu-miR-27a-3p	chr8:86,730,722-86,733,993	OK	intronic	24-1: cluster with 23b, 27b; intronic - Apo	21.245	22.136	23.778	0.005	0.004	0.008	22.3863
mmu-miR-27b-3p	chr13:63,401,071-63,403,087	OK	intronic	cluster with 23b, 24-1; intronic - Apo	28.824	35.072	33.649	0.005	0.024	0.025	32.515
mmu-miR-296-5p	chr2:174,092,647-174,093,036				7.605	6.705	5.499	0.05	0.113	0.206	6.603
mmu-miR-298-5p	chr2:174,092,647-174,093,036	OK	intergenic	cluster with 296	7.605	6.705	5.499	0.05	0.113	0.206	6.603
mmu-miR-29a-3p	chr6:31,004,720-31,022,331	OK	intergenic	cluster with miR-29b-1	55.225	50.73	57.747	0.002	0.005	0.006	54.5673
mmu-miR-29b-1-3p	chr6:31,004,720-31,022,331	OK	intergenic	29b-1: cluster with miR-29a	55.067	50.559	57.51	0.003	0.006	0.003	54.3787
mmu-miR-29b-2-3p	chr1:196,844,061-196,864,459	LOW	intergenic	29b-2; cluster with miR-29c	1.908	1.565	1.488	0.062	0.15	0.079	1.65367
mmu-miR-29c-3p	chr1:196,844,061-196,864,459	LOW	intergenic	cluster with miR-29b-2	1.908	1.565	1.488	0.062	0.15	0.079	1.65367
mmu-miR-301a-3p	chr11:86,922,923-86,929,562	OK	intronic	intronic - Fam33a	35.995	43.115	42.055	0.003	0.008	0.009	40.3883
mmu-miR-301b-3p	chr16:17,121,721-17,125,215	LOW	intronic	intronic?- 2610318N02Rik; cluster with130b	10.397	9.412	8.28	0.02	0.057	0.013	9.363
mmu-miR-30a	chr1:23,263,039-23,302,826	OK	intergenic	cluster with miR-30c-2	16.24	19.2222	17.154	0.0179256	0.0075723	0.00848524	17.5387
mmu-miR-30b	chr15:68,162,962-68,194,043	OK	intergenic	clustered with miR-30d	15.2	16.445	14.251	0.007	0.007	0.008	15.2987
mmu-miR-30c-1	chr4:120,441,660-120,446,226	OK	intergenic	intronic - Nfyc; cluster with 30e	9.805	9.959	11.056	0.011	0.011	0.01	10.2733
mmu-miR-30c-2	chr1:23,263,039-23,302,826	OK	intergenic	cluster with miR-30a	16.24	19.2222	17.154	0.0179256	0.0075723	0.00848524	17.5387
mmu-miR-30d	chr15:68,162,962-68,194,043	OK	intergenic	clustered with miR-30b	15.2	16.445	14.251	0.007	0.007	0.008	15.2987
mmu-miR-30e-5p	chr4:120,441,660-120,446,226	LOW	intronic	intronic - Nfyc; cluster with 30c-1	9.805	9.959	11.056	0.011	0.011	0.01	10.2733
mmu-miR-31	chr4:88,545,318-88,584,210	OK	intergenic	intergenic	112.398	126.73	111.799	0.006	0.006	0.005	116.976
mmu-miR-320-3p	chr14:70,843,374-70,844,589	LOW	divergent	divergent to Polr3d	0.744	0.817	0.907	0.169	0.154	0.278	0.822667
mmu-miR-322	chrX:50,406,385-50,410,299	OK	intergenic	clustered with miR-351, miR-503	8.911	9.265	8.707	0.016	0.016	0.017	8.961
mmu-miR-335-5p	chr6:30,690,947-30,692,071	OK	intronic	intronic - Mest	0.555	0.442	0.742	0.19	0.239	0.142	0.579667
mmu-miR-34a-5p	chr4:149,442,180-149,445,107	LOW	intergenic	intergenic	5.489	6.359	5.394	0.018	0.016	0.038	5.74733
mmu-miR-351	chrX:50,406,385-50,410,299	OK	intergenic	clustered with miR-322, miR-503	8.976	9.418	8.821	0.035	0.011	0.024	9.07167
mmu-miR-365-1-3p	chr16:13,448,205-13,458,599	LOW	intergenic	365-1: cluster with 193b	0.098	0.145	0.117	1.209	0.821	1.015	0.12
mmu-miR-365-2-3p	chr11:79,525,612-79,551,845	OK	intergenic	365-2: cluster with 193a	36.619	31.482	33.162	0.013	0.009	0.008	33.7543
mmu-miR-374	chrX:100,765,399-100,772,577	LOW	intergenic	cluster with miR-421	15.248	16.721	15.115	0.021	0.02	0.029	15.6947
mmu-miR-421	chrX:100,765,399-100,772,577	LOW	intergenic	cluster with miR-374	15.248	16.721	15.115	0.021	0.02	0.029	15.6947
mmu-miR-423-5p	chr11:76,890,303-76,891,873	LOW	intronic	intronic - Ccdc55	7.579	10.738	10.512	0.063	0.009	0.009	9.60967
mmu-miR-425	chr9:108,469,867-108,472,159	LOW	intergenic	cluster with miR-191	3.167	1.725	2.49	0.044	0.162	0.112	2.46067
mmu-miR-466b-3p	chr2:10,394,148-10,426,070	LOW	intronic	intronic - Sfmbt2	0.439	0.477	0.552	0.574	0.529	0.228	0.489333
mmu-miR-501-3p	chrX:6,810,379-6,827,376	LOW	intergenic	cluster with 500, 362, 188, 532	2.594	2.842	2.922	0.037	0.033	0.065	2.786
mmu-miR-503	chrX:50,406,385-50,410,299	OK	intergenic	clustered with miR-322, miR-351	8.911	9.265	8.707	0.016	0.016	0.017	8.961
mmu-miR-532-5p	chrX:6,810,379-6,827,376	LOW	intergenic	cluster with 500, 362, 188, 501	2.588	2.84	2.912	0.042	0.038	0.074	2.78
mmu-miR-574-3p	chr5:65,361,596-65,367,788	OK	intronic	intronic - Fam114a1	5.237	8.075	7.079	0.051	0.049	0.075	6.797
mmu-miR-652-3p	chrX:139,159,387-139,186,419	LOW	intronic	intronic -Tmem164	4.741	5.034	4.511	0.022	0.021	0.023	4.762
mmu-miR-669c-5p	chr2:10,394,148-10,426,070	LOW	intronic	intronic - Sfmbt2	0.439	0.477	0.552	0.574	0.529	0.228	0.489333
mmu-miR-92a-1-3p	chr14:115,441,507-115,446,111	OK	intergenic	92a-1; cluster with 18, 19a, 19b-1, 17	55.479	52.886	50.695	0.028	0.034	0.028	53.02
mmu-miR-92a-2-3p	chrX:50,094,541-50,098,178	LOW	intergenic	92a-2; cluster with 19b-2, 20b, 18b, 106a, 363	0.018	0.018	0.018	6.363	6.211	6.344	0.018
mmu-miR-93-5p	chr5:138,606,439-138,607,121	LOW	intronic	intronic - Mcm7; cluster with 25, 106b	18.516	18.753	17.932	0.006	0.031	0.007	18.4003
mmu-miR-96-5p	chr6:30,115,777-30,124,226	LOW	intergenic	cluster with 182, 183, 96	3.833	4.043	3.928	0.036	0.034	0.035	3.93467
mmu-miR-99a-5p	chr16:77,598,016-77,601,268	LOW	intergenic	cluster with let7c-1	1.509	1.77	2.012	0.105	0.09	0.079	1.76367
mmu-miR-99b-5p	chr17:17,964,516-17,980,285	OK	intergenic	cluster with let-7e, miR.125a	48.954	45.439	45.832	0.003	0.003	0.006	46.7417

## Sheet: synthesis and decay
N	miRNA NAME (miRBase21)	Nr loci	SINGLETON?	synthesis rate (RPKM/h )	synthesis rate (CPC/h ) [k1]	transcription class (4)	miRNA reads (3T9 growing)	mature miRNA (CPC)	Half Life (h)	decay class (3)	alpha (h) [1/TD]	K3 [ln(2)/HL-alpha]	theoric miRNA "mu" (CPC) [K1/(K3+a)]	"mu"(CPC) with HL=24h
1	mmu-let-7a-5p	2	2 clustered	64.37	8.75	1. Very High	5072.52	475.4	13	OTHER	0.05	0.00331901	164.107	302.966
2	mmu-let-7b-5p	1	2 clustered	20.3	2.76	2. High	551.639	51.7	8.7	FAST	0.05	0.0296721	34.642	95.5641
3	mmu-let-7c-5p	2	2 clustered	22.05	3	2. High	3195.66	299.5	11.7	FAST	0.05	0.00924335	50.6386	103.874
4	mmu-let-7d-5p	1	2 clustered	56.72	7.71	1. Very High	2106.26	197.4	14.6	OTHER	0.05	-0.00252417	162.398	266.956
5	mmu-let-7e-5p	1	2 clustered	46.82	6.36	1. Very High	1985.69	186.1	22.7	OTHER	0.05	-0.0194649	208.285	220.213
6	mmu-let-7i-5p	1	1 single	18.36	2.49	2. High	24141.9	2262.6	25.4	OTHER	0.05	-0.0227107	91.2447	86.2155
7	mmu-miR-100-5p	1	2 clustered	7.7	1.05	3. Low	1404.17	131.6	7.9	FAST	0.05	0.0377401	11.9672	36.3559
8	mmu-miR-103-3p	2	1 single	21.77	2.96	2. High	1395.64	130.8	13.4	FAST	0.05	0.0017274	57.2231	102.489
9	mmu-miR-106b-3p	1	2 clustered	18.4	2.5	2. High	32.01	3	14.5	OTHER	0.05	-0.00219675	52.2977	86.5617
10	mmu-miR-1249-3p	1	1 single	4.24	0.58	4. Very Low	36.278	3.4	10.6	FAST	0.05	0.0153912	8.86969	20.0823
11	mmu-miR-125a-5p	1	2 clustered	46.81	6.36	1. Very High	8095.33	758.7	26.8	SLOW	0.05	-0.0241363	245.904	220.213
12	mmu-miR-125b-5p	2	1 single	221.09	30.04	1. Very High	11764.7	1102.6	41.3	SLOW	0.05	-0.0332168	1789.88	1040.13
13	mmu-miR-130a-3p	1	1 single	11.6	1.58	3. Low	535.634	50.2	42	SLOW	0.05	-0.0334965	95.7372	54.707
14	mmu-miR-130b-3p	1	2 clustered	9.31	1.26	3. Low	259.281	24.3	40.4	SLOW	0.05	-0.0328429	73.4389	43.6271
15	mmu-miR-140-3p	1	1 single	14.97	2.03	3. Low	1138.49	106.7	7.8	FAST	0.05	0.038865	22.8436	70.2881
16	mmu-miR-143-3p	1	2 clustered	15.37	2.09	3. Low	46442.2	4352.6	11.8	OTHER	0.05	0.00874129	35.5797	72.3656
17	mmu-miR-145a-5p	1	2 clustered	15.37	2.09	3. Low	332.904	31.2	13	OTHER	0.05	0.00331901	39.198	72.3656
18	mmu-miR-149-5p	1	1 single	2.45	0.33	4. Very Low	138.71	13	22.6	OTHER	0.05	-0.0193298	10.7596	11.4261
19	mmu-miR-151-3p	1	1 single	14.42	1.96	3. Low	7965.15	746.5	27.9	OTHER	0.05	-0.025156	78.8923	67.8644
20	mmu-miR-152-3p	1	1 single	2.67	0.36	4. Very Low	58.685	5.5	6.3	FAST	0.05	0.0600234	3.27203	12.4649
21	mmu-miR-155-5p	1	1 single	8.76	1.19	3. Low	161.117	15.1	12.3	FAST	0.05	0.00635343	21.1167	41.2034
22	mmu-miR-15a-5p	1	2 clustered	26.82	3.64	2. High	168.586	15.8	28.4	OTHER	0.05	-0.0255934	149.14	126.034
23	mmu-miR-15b-5p	1	2 clustered	54.22	7.37	1. Very High	609.257	57.1	37.5	SLOW	0.05	-0.0315161	398.725	255.184
24	mmu-miR-16-5p	2	2 clustered	81.16	11.03	1. Very High	15666.8	1468.3	48	SLOW	0.05	-0.0355594	763.82	381.91
25	mmu-miR-17-5p	1	2 clustered	52.64	7.15	1. Very High	517.495	48.5	38.2	SLOW	0.05	-0.0318548	394.043	247.566
26	mmu-miR-181a-5p	2	2 clustered	15.71	2.14	2. High	7444.46	697.7	26.3	SLOW	0.05	-0.0236446	81.1978	74.0968
27	mmu-miR-181b-5p	2	2 clustered	15.71	2.13	3. Low	1913.13	179.3	28.8	SLOW	0.05	-0.0259324	88.5007	73.7506
28	mmu-miR-182-5p	1	2 clustered	3.93	0.53	4. Very Low	9062.03	849.3	9.1	FAST	0.05	0.02617	6.95812	18.3511
29	mmu-miR-183-5p	1	2 clustered	3.93	0.53	4. Very Low	1434.05	134.4	17.3	OTHER	0.05	-0.00993369	13.2281	18.3511
30	mmu-miR-186-5p	1	1 single	40.92	5.56	2. High	5279.52	494.8	48	SLOW	0.05	-0.0355594	385.026	192.513
31	mmu-miR-191-5p	1	2 clustered	2.46	0.33	4. Very Low	10370.2	971.9	48	OTHER	0.05	-0.0355594	22.8523	11.4261
32	mmu-miR-192-5p	1	2 clustered	0.26	0.04	4. Very Low	627.396	58.8	48	SLOW	0.05	-0.0355594	2.76997	1.38499
33	mmu-miR-194-5p	1	2 clustered	0.26	0.04	4. Very Low	64.02	6	33.5	OTHER	0.05	-0.029309	1.93321	1.38499
34	mmu-miR-1964-3p	1	1 single	5.47	0.74	4. Very Low	21.34	2	48	SLOW	0.05	-0.0355594	51.2445	25.6223
35	mmu-miR-199a-3p	2	1 single	69.06	9.38	1. Very High	2658.96	249.2	9.6	FAST	0.05	0.0222028	129.912	324.78
36	mmu-miR-19b-3p	2	2 clustered	52.66	7.15	1. Very High	297.693	27.9	48	SLOW	0.05	-0.0355594	495.133	247.566
37	mmu-miR-20a-5p	1	2 clustered	52.95	7.19	1. Very High	239.008	22.4	42.2	SLOW	0.05	-0.0335747	437.74	248.951
38	mmu-miR-214-3p	1	2 clustered	64.06	8.7	1. Very High	433.202	40.6	4.6	FAST	0.05	0.100684	57.7367	301.235
39	mmu-miR-218-5p	2	1 single	8.48	1.15	3. Low	138.71	13	48	SLOW	0.05	-0.0355594	79.6368	39.8184
40	mmu-miR-21a-5p	1	1 single	86.22	11.71	1. Very High	90659.8	8496.7	48	SLOW	0.05	-0.0355594	810.91	405.455
41	mmu-miR-22-3p	1	1 single	45.28	6.15	1. Very High	156585	14675.3	28	OTHER	0.05	-0.0252447	248.432	212.942
42	mmu-miR-221-3p	1	2 clustered	28.34	3.85	2. High	740.498	69.4	16.3	OTHER	0.05	-0.00747563	90.5363	133.305
43	mmu-miR-222-3p	1	2 clustered	28.05	3.81	2. High	5930.39	555.8	14.1	OTHER	0.05	-0.000840625	77.503	131.92
44	mmu-miR-224-5p	1	1 single	1.97	0.27	4. Very Low	25.608	2.4	9.2	FAST	0.05	0.0253421	3.58365	9.34866
45	mmu-miR-23a-3p	1	2 clustered	22.39	3.04	2. High	756.503	70.9	22.7	OTHER	0.05	-0.0194649	99.5575	105.259
46	mmu-miR-23b-3p	1	2 clustered	32.52	4.42	2. High	922.955	86.5	13	OTHER	0.05	0.00331901	82.8973	153.041
47	mmu-miR-24-3p	2	2 clustered	54.69	7.43	1. Very High	129.107	12.1	10.1	FAST	0.05	0.0186284	108.264	257.261
48	mmu-miR-25-3p	1	2 clustered	18.42	2.5	2. High	4106.88	384.9	48	SLOW	0.05	-0.0355594	173.123	86.5617
49	mmu-miR-26a-5p	2	1 single	9.68	1.31	3. Low	20358.4	1908	12.2	OTHER	0.05	0.00681534	23.0572	45.3583
50	mmu-miR-27a-3p	1	2 clustered	22.39	3.04	2. High	430.001	40.3	48	OTHER	0.05	-0.0355594	210.518	105.259
51	mmu-miR-27b-3p	1	2 clustered	32.52	4.42	2. High	24143	2262.7	21.9	OTHER	0.05	-0.0183494	139.65	153.041
52	mmu-miR-296-5p	1	2 clustered	6.6	0.9	3. Low	107.767	10.1	14.9	OTHER	0.05	-0.00348005	19.3465	31.1622
53	mmu-miR-298-5p	1	2 clustered	6.6	0.9	3. Low	4640.38	434.9	8.8	FAST	0.05	0.0287667	11.4261	31.1622
54	mmu-miR-29a-3p	1	2 clustered	54.57	7.41	1. Very High	4274.4	400.6	31.3	SLOW	0.05	-0.0278547	334.609	256.569
55	mmu-miR-29b-3p	2	2 clustered	56.03	7.61	1. Very High	189.926	17.8	48	SLOW	0.05	-0.0355594	526.988	263.494
56	mmu-miR-301a-3p	1	2 clustered	40.39	5.49	2. High	1761.62	165.1	48	SLOW	0.05	-0.0355594	380.179	190.089
57	mmu-miR-301b-3p	1	2 clustered	9.36	1.27	3. Low	66.154	6.2	48	SLOW	0.05	-0.0355594	87.9467	43.9733
58	mmu-miR-30a-5p	1	2 clustered	17.54	2.38	2. High	15354.1	1439	27.6	SLOW	0.05	-0.024886	94.7678	82.4067
59	mmu-miR-30b-5p	1	2 clustered	15.3	2.08	3. Low	774.642	72.6	12.5	OTHER	0.05	0.00545177	37.5101	72.0193
60	mmu-miR-30c-5p	2	2 clustered	27.81	3.78	2. High	2406.09	225.5	16.2	OTHER	0.05	-0.00721314	88.3449	130.881
61	mmu-miR-30d-5p	1	2 clustered	15.3	2.08	3. Low	12540.5	1175.3	15.7	OTHER	0.05	-0.0058505	47.1126	72.0193
62	mmu-miR-30e-5p	1	2 clustered	10.27	1.4	3. Low	6278.23	588.4	48	SLOW	0.05	-0.0355594	96.9491	48.4746
63	mmu-miR-31-5p	1	1 single	116.98	15.89	1. Very High	11785	1104.5	13.5	OTHER	0.05	0.00134424	309.48	550.186
64	mmu-miR-320-3p	1	1 single	0.82	0.11	4. Very Low	237.941	22.3	9.9	FAST	0.05	0.0200149	1.57109	3.80871
65	mmu-miR-322-5p	1	2 clustered	8.96	1.22	3. Low	1549.28	145.2	10.6	OTHER	0.05	0.0153912	18.6569	42.2421
66	mmu-miR-335-5p	1	1 single	0.58	0.08	4. Very Low	132.308	12.4	4.7	FAST	0.05	0.0974781	0.542453	2.76997
67	mmu-miR-34a-5p	1	1 single	5.75	0.78	4. Very Low	29.876	2.8	48	SLOW	0.05	-0.0355594	54.0145	27.0073
68	mmu-miR-351-5p	1	2 clustered	9.07	1.23	3. Low	1714.67	160.7	12.7	OTHER	0.05	0.00457852	22.5363	42.5884
69	mmu-miR-365-3p	2	2 clustered	33.87	4.6	2. High	297.693	27.9	48	SLOW	0.05	-0.0355594	318.547	159.274
70	mmu-miR-421-3p	1	2 clustered	15.69	2.13	3. Low	656.205	61.5	28.1	OTHER	0.05	-0.0253328	86.3496	73.7506
71	mmu-miR-423-5p	1	1 single	9.61	1.31	3. Low	1825.64	171.1	35.5	SLOW	0.05	-0.0304747	67.0925	45.3583
72	mmu-miR-466b-3p	1	2 clustered	0.49	0.07	4. Very Low	69.355	6.5	5.1	FAST	0.05	0.0859112	0.515042	2.42373
73	mmu-miR-501-3p	1	2 clustered	2.79	0.38	4. Very Low	39.479	3.7	7.9	FAST	0.05	0.0377401	4.33097	13.1574
74	mmu-miR-532-5p	1	2 clustered	2.78	0.38	4. Very Low	412.929	38.7	12.3	FAST	0.05	0.00635343	6.74316	13.1574
75	mmu-miR-574-3p	1	1 single	6.8	0.92	3. Low	121.638	11.4	7.4	FAST	0.05	0.0436685	9.82187	31.8547
76	mmu-miR-652-3p	1	1 single	4.76	0.65	4. Very Low	17.072	1.6	7.3	FAST	0.05	0.0449517	6.84559	22.506
77	mmu-miR-669c-5p	1	2 clustered	0.49	0.07	4. Very Low	36.278	3.4	7.5	FAST	0.05	0.0424196	0.757415	2.42373
78	mmu-miR-92a-3p	2	2 clustered	53.04	7.21	1. Very High	24373.5	2284.3	48	SLOW	0.05	-0.0355594	499.288	249.644
79	mmu-miR-93-5p	1	2 clustered	18.4	2.5	2. High	804.518	75.4	28	SLOW	0.05	-0.0252447	100.989	86.5617
80	mmu-miR-96-5p	1	2 clustered	3.93	0.53	4. Very Low	80.025	7.5	17.7	OTHER	0.05	-0.0108391	13.5339	18.3511
81	mmu-miR-99a-5p	1	2 clustered	1.76	0.24	4. Very Low	62.953	5.9	48	SLOW	0.05	-0.0355594	16.6198	8.30992
82	mmu-miR-99b-5p	1	2 clustered	46.74	6.35	1. Very High	6287.83	589.3	10.9	FAST	0.05	0.0135915	99.8561	219.867

## Sheet: Time evolution model
T1/2	Transcription Rate (K1)	alpha	mean V_UP [CPC/hour]	miR at plateau (100h limit)	PRI at plateau (100h limit)	mean V_DOWN [CPC/hour]	Plateau in 100h?	CPC at plateau	Time to 90% of plateau (hours)	interval (CPC)
SLOW (T1/2=24h)	K1= 1 Low Transcr.	a=0	0.89	33	1	0.077	NO	33.96	75	2-4
		a=1/48	0.83	20	0.98	0.14	YES	19.92	46
		a=1/24	0.77	14	0.96	0.2	YES	14.1	33
	K1= 6 High Transcr.	a=0	5.4	196	6	0.39	NO	205	75	10-20
		a=1/48	5.1	112	5.9	0.71	NO	119.9	46
		a=1/24	4.8	84	5.8	1	YES	84.47	33
FAST (T1/2=4h)	K1= 1 Low Transcr.	a=0	0.45	5.8	1	0.5	YES	5.755	14	2-4
		a=1/48	0.38	5.1	0.98	0.54	YES	5.138	13
		a=1/24	0.29	4.6	0.96	0.57	YES	4.64	12
	K1= 6 High Transcr.	a=0	3.2	34	6	2.5	YES	34.5	14	10-20
		a=1/48	2.9	31	5.9	2.8	YES	30.85	13
		a=1/24	2.6	28	5.8	3	YES	27.86	12
SLOW (T1/2=24h)	K1= 1 Low Transcr.	a=0	0.76	32.6	3	0.8	NO	33.9	78	2-4
		a=1/48	0.72	19.9	2.8	0.14	YES	19.9	48
		a=1/24	0.68	14.1	2.7	0.2	YES	14.1	35
	K1= 6 High Transcr.	a=0	4.4	195	18	0.39	NO	205	79	10-20
		a=1/48	4.2	120	17	0.72	NO	120	48
		a=1/24	4	84.4	16	1	YES	84.4	35
FAST (T1/2=4h)	K1= 1 Low Transcr.	a=0	0.38	5.75	3	0.41	YES	5.75	17	2-4
		a=1/48	0.33	5.13	2.8	0.43	YES	5.13	15
		a=1/24	0.27	4.64	2.7	0.45	YES	4.63	14
	K1= 6 High Transcr.	a=0	2.6	34.5	18	2.1	YES	34.5	17	10-20
		a=1/48	2.4	30.8	17	2.3	YES	30.8	16
		a=1/24	2.2	27.8	16	2.4	YES	27.8	14
SLOW (T1/2=24h)	K1= 1 Low Transcr.	a=0	0.52	32	9.95	0.083	NO	33.8	85	2-4
		a=1/48	0.51	20	8.23	0.14	NO	19.8	54
		a=1/24	0.49	14.1	7.04	0.19	YES	14.1	41
	K1= 6 High Transcr.	a=0	2.94	191	59.8	0.39	NO	204	87	10-20
		a=1/48	2.96	119	49.5	0.71	NO	120	56
		a=1/24	2.9	84.2	42.2	1	YES	84.2	41
FAST (T1/2=4h)	K1= 1 Low Transcr.	a=0	0.21	5.73	9.95	0.23	YES	5.73	30	2-4
		a=1/48	0.19	5.11	8.24	0.26	YES	5.11	26
		a=1/24	0.17	4.63	7.04	0.28	YES	4.63	23
	K1= 6 High Transcr.	a=0	1.45	34.4	59.8	1.19	YES	34.4	30	10-20
		a=1/48	1.43	30.8	49.5	1.37	YES	30.8	26
		a=1/24	1.35	27.8	42.2	1.53	YES	27.8	23
