# Supplementary material for: Degradation dynamics of microRNAs revealed by a novel pulse-chase approach
Source: HighWire-hosted journal article supplement (doi:10.1101/gr.198788.115), 2016-01-28
Supplement: TABLE_S3_TPMs.xlsx [file TABLE_S3_TPMs.xlsx]

## Sheet: Decay and TPM
N	miRNA NAME (miRBase21)	miR family Targetscan	Seed+m8	Half Life (h)	Decay class (2)	Decay class (3)	miRNA expression (CPC)	synthesis RPKM/h	TPM_seed	TPM_3C.03	TPM_3C.05	N of TG_seed	N of TG_3C.03	N of TG_3C.05	TG_SEED (CPC)	TG_3C.03 (CPC)	TG_3C.05 (CPC)	TPM_s 5 classes	TPM_c 0.3 5 classes	TPM_c 0.5 5 classes	CLASS TG_seed	Class TG_3C.03	Class TG_3C.05	K1 CLASS	miRNA CPC CLASS	Theoric miRNA with K3=24h (CPC)	TPM_s virtual [HL=24]	TPM_3c.03 virtual [HL=24]	TPM_3c.05 virtual [HL=24]	CLASS TPM_s virtual	CLASS TPM_3c.03 virtual	CLASS TPM_3c.05 virtual
1	mmu-let-7a-5p	let-7/98/4458/4500	GAGGUAG	13		OTHER	475.365	64.368	11.4793	0.890803	0.0335025	429	31	7	5456.85	423.457	15.9259	class 2	Class 2	Class 1 Bottom				HIGH	HIGH	302.966	18.011	1.398	0.0526	LOW		LOW
2	mmu-let-7b-5p	let-7/98/4458/4500	GAGGUAG	8.69	FAST	FAST	51.658	20.301	105.634	9.51174	0.62376	429	39	8	5456.85	491.358	32.2222	class 3	Class 3	Class 3						95.564	57.101	5.142	0.3372
3	mmu-let-7c-5p	let-7/98/4458/4500	GAGGUAG	11.7	FAST	FAST	299.468	22.054	18.2218	1.40001	0.0531808	429	30	7	5456.85	419.259	15.9259	class 2	Class 2	Class 1 Bottom						103.874	52.533	4.036	0.1533
4	mmu-let-7d-5p	let-7/98/4458/4500	GAGGUAG	14.6		OTHER	197.387	56.716	27.6454	0.759301	0.0559781	429	24	4	5456.85	149.877	11.0494	class 2	Class 2	Class 2			LOW TG_c	HIGH		266.956	20.441	0.561	0.0414	LOW	LOW	LOW
5	mmu-let-7e-5p	let-7/98/4458/4500	GAGGUAG	22.7		OTHER	186.145	46.823	29.315	2.09547	0.0855564	429	29	7	5456.85	390.062	15.9259	class 2	Class 2	Class 2						220.213	24.78	1.771	0.0723	LOW		LOW
6	mmu-let-7f-5p	let-7/98/4458/4500	GAGGUAG	19.1		OTHER	2685.88		2.03168	0.145526	0.102318	429	32	7	5456.85	390.864	274.815	class 1 (bottom)	Class 1 Bottom	Class 2			HIGH TG_c		HIGH
7	mmu-let-7g-5p	let-7/98/4458/4500	GAGGUAG	12.3		OTHER	207.56		26.2904	2.41816	0.188254	429	34	6	5456.85	501.914	39.0741	class 2	Class 2	Class 2
8	mmu-let-7i-5p	let-7/98/4458/4500	GAGGUAG	25.4		OTHER	2262.57	18.358	2.41179	0.211166	0.0207346	429	36	8	5456.85	477.778	46.9136	class 1 (bottom)	Class 1 Bottom	Class 1 Bottom					HIGH	86.215	63.293	5.542	0.5441
9	mmu-miR-100-5p	miR-99ab/100	ACCCGUA	7.93	FAST	FAST	131.555	7.7	9.73402	0.327987		156	2		1280.56	43.1481		class 2	Class 1 Bottom		LOW TG	LOW TG_c				36.356	35.223	1.187			LOW
10	mmu-miR-101b-3p	miR-101/101ab	ACAGUAC	20		OTHER	44.3647		149.663	3.63708	0.296365	432	27	4	6639.75	161.358	13.1481	class 3	Class 3	Class 2
11	mmu-miR-103-3p	miR-103a/107/107ab	GCAGCAU	13.4	FAST	FAST	130.789	21.772	66.5193	3.10556	0.697098	505	54	16	8700	406.173	91.1728	class 2	Class 2	Class 3						102.489	84.887	3.963	0.8896
12	mmu-miR-107-3p	miR-103a/107/107ab	GCAGCAU	27.8		OTHER	1.26199		6893.89	318.672	72.2455	505	53	16	8700	402.16	91.1728	class 5 (top)	Class 5 Top TMP_c	Class 5 Top TMP_c					LOW
13	mmu-miR-1191b-5p	NOT PRESENT		29.1		OTHER	0.843862																		LOW
14	mmu-miR-1198-5p	miR-1198-5p	AUGUGUU	17.1		OTHER	7.37808		318.243	133.947	1.41393	159	15	3	2348.02	988.272	10.4321	class 4	Class 5 Top TMP_c	Class 3	LOW TG	HIGH TG_c	LOW TG_c
15	mmu-miR-1249-3p	miR-1249	CGCCCUU	10.6	FAST	FAST	3.37765	4.24	517.435	34.8149		184	15		1747.72	117.593		class 4	Class 4		LOW TG	LOW TG_c			LOW	20.082	87.028	5.856
16	mmu-miR-125a-5p	miR-125a-5p/125b-5p/351/670/4319	CCCUGAG	26.8	SLOW	SLOW	758.666	46.813	9.02315	0.388841	0.0341731	669	45	8	6845.56	295	25.9259	class 1 (bottom)	Class 1 Bottom	Class 1 Bottom					HIGH	220.213	31.086	1.34	0.1177	LOW		LOW
17	mmu-miR-125b-5p	miR-125a-5p/125b-5p/351/670/4319	CCCUGAG	41.3	SLOW	SLOW	1102.64	221.092	6.2083	0.129319	0.00710973	669	28	5	6845.56	142.593	7.83951	class 1 (bottom)	Class 1 Bottom	Class 1 Bottom			LOW TG_c	HIGH	HIGH	1040.12	6.581	0.137	0.0075	LOW	LOW	LOW
18	mmu-miR-128-3p	miR-128/128ab	CACAGUG	21.1		OTHER	17.7861		550.087	16.3743	1.10365	529	41	5	9783.89	291.235	19.6296	class 4	Class 3	Class 3	HIGH TG
19	mmu-miR-129-5p	miR-129-5p/129ab-5p	UUUUUGC	16.1		OTHER	6.03216		370.33	60.8978	58.36	74	11	5	2233.89	367.346	352.037	class 4	Class 5 Top TMP_c	Class 5 Top TMP_c	LOW TG		HIGH TG_c
20	mmu-miR-130a-3p	miR-130ac/301ab/301b/301b-3p/454/721/4295/3666	AGUGCAA	42	SLOW	SLOW	50.2222	11.604	100.777	18.0592	3.19322	420	110	20	5061.23	906.975	160.37	class 3	Class 4	Class 4		HIGH TG_c	HIGH TG_c			54.707	92.515	16.579	2.9314
21	mmu-miR-130b-3p	miR-130ac/301ab/301b/301b-3p/454/721/4295/3666	AGUGCAA	40.4	SLOW	SLOW	24.3369	9.309	207.966	26.8987	3.66258	420	64	12	5061.23	654.63	89.1358	class 3	Class 4	Class 4						43.627	116.011	15.005	2.0431
22	mmu-miR-132-3p	miR-132/212/212-3p	AACAGUC	13.5		OTHER	1.77751		4034.46	103.21	48.5837	325	30	10	7171.3	183.457	86.358	class 5 (top)	Class 5 Top TMP_c	Class 5 Top TMP_c					LOW
23	mmu-miR-138-5p	miR-138/138ab	GCUGGUG	11.8		OTHER	2.79861		3082.02	252.793	18.8586	691	46	10	8625.37	707.469	52.7778	class 5 (top)	Class 5 Top TMP_c	Class 5 Top TMP_c		HIGH TG_c			LOW
24	mmu-miR-140-3p	miR-140-3p	ACCACAG	7.78	FAST	FAST	106.689	14.97																		70.288
25	mmu-miR-143-3p	miR-143/1721/4770	GAGAUGA	11.8		OTHER	4352.6	15.371	0.83431	0.0524023	0.013799	226	48	14	3631.42	228.086	60.0617	class 1 (bottom)	Class 1 Bottom	Class 1 Bottom					HIGH	72.366	50.182	3.152	0.83
26	mmu-miR-145a-5p	miR-145	UCCAGUU	13		OTHER	31.1968	15.371	304.758	26.1304	2.26559	462	59	14	9507.47	815.185	70.679	class 4	Class 4	Class 4	HIGH TG	HIGH TG_c				72.366	131.381	11.265	0.9767
27	mmu-miR-146b-5p	miR-146ac/146b-5p	GAGAACU	24		OTHER	61.4238		52.6468	6.08804	1.00898	276	39	12	3233.77	373.951	61.9753	class 2	Class 3	Class 3
28	mmu-miR-148a-3p	miR-148ab-3p/152	CAGUGCA	10.7		OTHER	47.4903		184.676	16.4868	1.19843	582	78	18	8770.31	782.963	56.9136	class 3	Class 4	Class 3	HIGH TG	HIGH TG_c
29	mmu-miR-148b-3p	miR-148ab-3p/152	CAGUGCA	48		OTHER	16.5431		530.149	46.5749	3.39554	582	79	18	8770.31	770.494	56.1728	class 4	Class 4	Class 4	HIGH TG	HIGH TG_c
30	mmu-miR-149-5p	miR-149	CUGGCUC	22.6		OTHER	13.0487	2.451	1036.86	46.9421	8.0468	714	88	22	13529.6	612.531	105	class 5 (top)	Class 4	Class 4	HIGH TG			LOW		11.426	1184.09	53.608	9.1895	HIGH	HIGH	HIGH
31	mmu-miR-151-3p	miR-151-3p	UAGACUG	27.9		OTHER	746.487	14.419	3.58221	0.38245	0.128917	203	19	5	2674.07	285.494	96.2346	class 1 (bottom)	Class 1 Bottom	Class 2	LOW TG				HIGH	67.864	39.403	4.207	1.418
32	mmu-miR-152-3p	miR-148ab-3p/152	CAGUGCA	6.34	FAST	FAST	5.48263	2.665	1599.65	139.363	14.6028	582	78	20	8770.31	764.074	80.0617	class 5 (top)	Class 5 Top TMP_c	Class 5 Top TMP_c	HIGH TG	HIGH TG_c		LOW	LOW	12.465	703.601	61.298	6.423	HIGH	HIGH	HIGH
33	mmu-miR-155-5p	miR-155	UAAUGCU	12.3	FAST	FAST	15.0522	8.763	131.383	16.9329	1.93566	194	15	6	1977.59	254.877	29.1358	class 3	Class 4	Class 3	LOW TG					41.203	47.996	6.186	0.7071
34	mmu-miR-15a-5p	miR-15abc/16/16abc/195/322/424/497/1907	AGCAGCA	28.4		OTHER	15.7829	26.82	886.957	66.5941	6.75054	877	96	13	13998.8	1051.05	106.543	class 5 (top)	Class 5 Top TMP_c	Class 4	HIGH TG	HIGH TG_c				126.034	111.071	8.339	0.8454
35	mmu-miR-15b-5p	miR-15abc/16/16abc/195/322/424/497/1907	AGCAGCA	37.5	SLOW	SLOW	57.1324	54.225	245.023	21.3777	3.54278	877	95	29	13998.8	1221.36	202.407	class 3	Class 4	Class 4	HIGH TG	HIGH TG_c	HIGH TG_c	HIGH		255.184	54.858	4.786	0.7932
36	mmu-miR-16-5p	miR-15abc/16/16abc/195/322/424/497/1907	AGCAGCA	48	SLOW	SLOW	1468.26	81.16	9.53425	0.310185	0.0258978	877	69	11	13998.8	455.432	38.0247	class 1 (bottom)	Class 1 Bottom	Class 1 Bottom	HIGH TG			HIGH	HIGH	381.91	36.655	1.193	0.0996			LOW
37	mmu-miR-17-5p	miR-17/17-5p/20ab/20b-5p/93/106ab/427/518a-3p/519d	AAAGUGC	38.2	SLOW	SLOW	48.4888	52.639	66.0583	4.86303	0.987883	332	44	10	3203.09	235.802	47.9012	class 2	Class 3	Class 3				HIGH		247.566	12.938	0.952	0.1935	LOW	LOW
38	mmu-miR-181a-5p	miR-181abcd/4262	ACAUUCA	26.3	SLOW	SLOW	697.708	15.714	7.59285	0.260288	0.0023003	324	30	2	5297.59	181.605	1.60494	class 1 (bottom)	Class 1 Bottom	Class 1 Bottom			LOW TG_c		HIGH	74.097	71.496	2.451	0.0217			LOW
39	mmu-miR-181b-5p	miR-181abcd/4262	ACAUUCA	28.8	SLOW	SLOW	179.285	15.712	29.5484	1.01294	0.0320201	324	30	3	5297.59	181.605	5.74074	class 2	Class 2	Class 1 Bottom			LOW TG_c			73.751	71.831	2.462	0.0778			LOW
40	mmu-miR-181c-5p	miR-181abcd/4262	ACAUUCA	45		OTHER	29.1019		182.036	1.58023	0.405133	324	12	4	5297.59	45.9877	11.7901	class 3	Class 2	Class 2		LOW TG_c	LOW TG_c
41	mmu-miR-181d-5p	miR-181abcd/4262	ACAUUCA	17.9		OTHER	12.8409		412.556	15.4214	5.55709	324	32	6	5297.59	198.025	71.358	class 4	Class 3	Class 4
42	mmu-miR-182-5p	miR-182	UUGGCAA	9.05	FAST	FAST	849.297	3.935	7.06757	0.798046	0.340296	417	62	20	6002.47	677.778	289.012	class 1 (bottom)	Class 2	Class 2			HIGH TG_c	LOW	HIGH	18.351	327.091	36.934	15.7491		HIGH	HIGH
43	mmu-miR-183-5p	miR-183	AUGGCAC	17.3		OTHER	134.375	3.935	56.4473	3.08607	0.540223	406	43	8	7585.12	414.691	72.5926	class 2	Class 2	Class 3				LOW		18.351	413.334	22.598	3.9558	HIGH		HIGH
44	mmu-miR-1839-5p	miR-1348/1839/1839-5p/3927	AGGUAGA	11.9		OTHER	5.9363		855.616	76.1063	18.2285	304	64	15	5079.2	451.79	108.21	class 5 (top)	Class 5 Top TMP_c	Class 5 Top TMP_c
45	mmu-miR-1843b-5p	miR-1843b-5p	UGGAGGU	11.7		OTHER	1.1714		4397.87	154.874	6.79782	382	31	3	5151.67	181.42	7.96296	class 5 (top)	Class 5 Top TMP_c	Class 4			LOW TG_c		LOW
46	mmu-miR-186-5p	miR-186	AAAGAAU	48	SLOW	SLOW	494.824	40.921	3.87992	1.14057	0.147452	52	44	11	1919.88	564.383	72.963	class 1 (bottom)	Class 2	Class 2	LOW TG				HIGH	192.513	9.973	2.932	0.379	LOW
47	mmu-miR-191-5p	miR-191	AACGGAA	48		OTHER	971.867	2.461	1.82162	0.555314	0.0263588	159	42	10	1770.37	539.691	25.6173	class 1 (bottom)	Class 1 Bottom	Class 1 Bottom	LOW TG			LOW	HIGH	11.426	154.94	47.233	2.242		HIGH
48	mmu-miR-192-5p	miR-192/215	UGACCUA	48	SLOW	SLOW	58.7986	0.262	46.479	4.36833	0.00209966	226	20	1	2732.9	256.852	0.123457	class 2	Class 3	Class 1 Bottom	LOW TG		LOW TG_c	LOW		1.385	1973.23	185.454	0.0891	HIGH	HIGH	LOW
49	mmu-miR-193a-3p	miR-193/193b/193a-3p	ACUGGCC	13.1		OTHER	46.0493		150.215	6.15149	0.305631	652	45	5	6917.28	283.272	14.0741	class 3	Class 3	Class 2
50	mmu-miR-194-5p	miR-194	GUAACAG	33.5		OTHER	5.98022	0.262	635.594	76.3216	3.62306	264	22	4	3800.99	456.42	21.6667	class 4	Class 5 Top TMP_c	Class 4				LOW		1.385	2744.42	329.548	15.6439	HIGH	HIGH	HIGH
51	mmu-miR-1964-3p	miR-1964-3p	CGACUUC	48	SLOW	SLOW	1.97217	5.473	702.491	11.174	9.38991	110	2	1	1385.43	22.037	18.5185	class 4	Class 3	Class 4	LOW TG	LOW TG_c			LOW	25.622	54.071	0.86	0.7228		LOW
52	mmu-miR-196b-5p	miR-196abc	AGGUAGU	10.8		OTHER	10.9761		277.988	33.985	2.34515	207	30	4	3051.23	373.025	25.7407	class 4	Class 4	Class 4	LOW TG
53	mmu-miR-1983	miR-412-3p/1983	UCACCUG	43.8	SLOW	SLOW	9.71812	0.046	487.17	33.6967	10.4298	354	41	8	4734.38	327.469	101.358	class 4	Class 4	Class 5 Top TMP_c				LOW		0.346	13673.4	945.768	292.733	HIGH	HIGH	HIGH
54	mmu-miR-199a-3p	miR-199ab-3p/3129-5p	CAGUAGU	9.59	FAST	FAST	249.154	69.061	19.019	0.954094	0.19622	288	32	7	4738.64	237.716	48.8889	class 2	Class 2	Class 2				HIGH		324.78	14.59	0.732	0.1505	LOW	LOW	LOW
55	mmu-miR-19b-3p	miR-19ab	GUGCAAA	48	SLOW	SLOW	27.8854	52.657	201.22	23.6705	6.37309	484	58	19	5611.11	660.062	177.716	class 3	Class 4	Class 4			HIGH TG_c	HIGH		247.566	22.665	2.666	0.7179	LOW
56	mmu-miR-205-5p	miR-205/205ab	CCUUCAU	7.83	FAST	FAST	4.01579		809.428	24.625	3.25874	247	9	3	3250.49	98.8889	13.0864	class 5 (top)	Class 4	Class 4		LOW TG_c			LOW	0.346	9387.79	285.602	37.7951	HIGH	HIGH	HIGH
57	mmu-miR-20a-5p	miR-17/17-5p/20ab/20b-5p/93/106ab/427/518a-3p/519d	AAAGUGC	42.2	SLOW	SLOW	22.4369	52.951	142.76	10.6114	1.8433	332	44	13	3203.09	238.086	41.358	class 3	Class 3	Class 3				HIGH		248.951	12.866	0.956	0.1661	LOW	LOW
58	mmu-miR-214-3p	miR-214/761/3619-5p	CAGCAGG	4.55	FAST	FAST	40.6247	64.06	352.176	49.0108	11.9598	905	166	54	14307	1991.05	485.864	class 4	Class 5 Top TMP_c	Class 5 Top TMP_c	HIGH TG	HIGH TG_c	HIGH TG_c	HIGH		301.235	47.495	6.61	1.6129
59	mmu-miR-218-5p	miR-218/218a	UGUGCUU	48	SLOW	SLOW	12.9876	8.475	360.747	39.4155	1.46863	367	44	5	4685.25	511.914	19.0741	class 4	Class 4	Class 3						39.818	117.665	12.856	0.479
60	mmu-miR-21a-5p	miR-21/590-5p	AGCUUAU	48	SLOW	SLOW	8496.74	86.216	0.244785	0.00913205	0.00153291	192	18	3	2079.88	77.5926	13.0247	class 1 (bottom)	Class 1 Bottom	Class 1 Bottom	LOW TG	LOW TG_c		HIGH	HIGH	405.455	5.13	0.191	0.0321	LOW	LOW	LOW
61	mmu-miR-22-3p	miR-22/22-3p	AGCUGCC	28		OTHER	14675.3	45.285	0.748307	0.0489315	0.0142256	690	75	14	10981.7	718.086	208.765	class 1 (bottom)	Class 1 Bottom	Class 1 Bottom	HIGH TG	HIGH TG_c	HIGH TG_c		HIGH	212.942	51.571	3.372	0.9804
62	mmu-miR-221-3p	miR-221/222/222ab/1928	GCUACAU	16.3		OTHER	69.3649	28.342	83.945	4.43619	1.18269	400	37	12	5822.84	307.716	82.037	class 3	Class 3	Class 3						133.305	43.681	2.308	0.6154
63	mmu-miR-222-3p	miR-221/222/222ab/1928	GCUACAU	14.1		OTHER	555.848	28.054	10.4756	0.415559	0.0423111	400	24	6	5822.84	230.988	23.5185	class 2	Class 1 Bottom	Class 1 Bottom					HIGH	131.92	44.139	1.751	0.1783
64	mmu-miR-224-5p	miR-224	AAGUCAC	9.23	FAST	FAST	2.3602	1.965	2587.11	118.503	10.2	330	32	4	6106.11	279.691	24.0741	class 5 (top)	Class 5 Top TMP_c	Class 5 Top TMP_c				LOW	LOW	9.349	653.153	29.918	2.5751	HIGH	HIGH
65	mmu-miR-23a-3p	miR-23abc/23b-3p	UCACAUU	22.7		OTHER	70.9306	22.386	80.2776	1.39242	0.218437	344	21	9	5694.14	98.7654	15.4938	class 3	Class 2	Class 2		LOW TG_c				105.259	54.096	0.938	0.1472		LOW	LOW
66	mmu-miR-23b-3p	miR-23abc/23b-3p	UCACAUU	13		OTHER	86.5	32.515	65.8281	1.13609	0.156997	344	20	7	5694.14	98.2716	13.5802	class 2	Class 2	Class 2		LOW TG_c				153.041	37.207	0.642	0.0887		LOW	LOW
67	mmu-miR-24-3p	miR-24/24ab/24-3p	GGCUCAG	10.1	FAST	FAST	12.0995	54.686	986.117	90.3158	19.4376	795	132	38	11931.5	1092.78	235.185	class 5 (top)	Class 5 Top TMP_c	Class 5 Top TMP_c	HIGH TG	HIGH TG_c	HIGH TG_c	HIGH		257.261	46.379	4.248	0.9142
68	mmu-miR-25-3p	miR-25/32/92abc/363/363-3p/367	AUUGCAC	48	SLOW	SLOW	384.948	18.421	8.81199	0.0383248	0.0173183	314	3	1	3392.16	14.7531	6.66667	class 1 (bottom)	Class 1 Bottom	Class 1 Bottom		LOW TG_c	LOW TG_c			86.562	39.188	0.17	0.077		LOW	LOW
69	mmu-miR-26a-5p	miR-26ab/1297/4465	UCAAGUA	12.2		OTHER	1908.04	9.677	2.91541	0.131866	0.00847616	296	25	5	5562.72	251.605	16.1728	class 1 (bottom)	Class 1 Bottom	Class 1 Bottom					HIGH	45.358	122.639	5.547	0.3566
70	mmu-miR-26b-5p	miR-26ab/1297/4465	UCAAGUA	9.43		OTHER	137.896		40.3401	1.74627	0.142799	296	23	4	5562.72	240.802	19.6914	class 2	Class 2	Class 2
71	mmu-miR-27a-3p	miR-27abc/27a-3p	UCACAGU	48		OTHER	40.2769	22.386	195.957	7.16184	0.864387	529	55	14	7892.53	288.457	34.8148	class 3	Class 3	Class 3						105.259	74.982	2.74	0.3308
72	mmu-miR-27b-3p	miR-27abc/27a-3p	UCACAGU	21.9		OTHER	2262.69	32.515	3.48812	0.152174	0.0173507	529	56	15	7892.53	344.321	39.2593	class 1 (bottom)	Class 1 Bottom	Class 1 Bottom					HIGH	153.041	51.571	2.25	0.2565
73	mmu-miR-28a-5p	miR-28-5p/708/1407/1653/3139	AGGAGCU	14.9		OTHER	92.3732		78.2267	5.86858	0.115607	450	42	5	7226.05	542.099	10.679	class 3	Class 3	Class 2			LOW TG_c
74	mmu-miR-296-5p	miR-296-5p	GGGCCCC	14.9		OTHER	10.0589	6.603	992.722	16.0658	12.8379	808	17	6	9985.74	161.605	129.136	class 5 (top)	Class 3	Class 5 Top TMP_c	HIGH TG		HIGH TG_c			31.162	320.444	5.186	4.144			HIGH
75	mmu-miR-298-5p	miR-298/2347/2467-3p	GCAGAGG	8.76	FAST	FAST	434.876	6.603	31.8347	4.30973	0.547624	843	109	20	13844.1	1874.2	238.148	class 2	Class 3	Class 3	HIGH TG	HIGH TG_c	HIGH TG_c		HIGH	31.162	444.26	60.143	7.6422	HIGH	HIGH	HIGH
76	mmu-miR-29a-3p	miR-29abcd	AGCACCA	31.3	SLOW	SLOW	400.557	54.567	22.8224	1.75835	0.137617	592	82	9	9141.67	704.321	55.1235	class 2	Class 2	Class 2	HIGH TG	HIGH TG_c		HIGH		256.569	35.63	2.745	0.2148
77	mmu-miR-29b-3p	miR-29abcd	AGCACCA	48	SLOW	SLOW	17.7518	56.032	514.971	41.6407	3.40428	592	84	12	9141.67	739.198	60.4321	class 4	Class 4	Class 4	HIGH TG	HIGH TG_c		HIGH		263.494	34.694	2.805	0.2293	LOW
78	mmu-miR-301a-3p	miR-130ac/301ab/301b/301b-3p/454/721/4295/3666	AGUGCAA	48	SLOW	SLOW	165.14	40.388	30.6482	1.01074	0.282963	420	26	4	5061.23	166.914	46.7284	class 2	Class 2	Class 2						190.089	26.626	0.878	0.2458	LOW	LOW
79	mmu-miR-301b-3p	miR-130ac/301ab/301b/301b-3p/454/721/4295/3666	AGUGCAA	48	SLOW	SLOW	6.18523	9.363	818.278	26.9858	2.86425	420	27	4	5061.23	166.914	17.716	class 5 (top)	Class 4	Class 4						43.973	115.098	3.796	0.4029
80	mmu-miR-3057-5p	miR-3057-5p	UUGGAGC	21.1		OTHER	7.85779		216.024	40.0247	33.8345	162	20	5	1697.47	314.506	265.864	class 3	Class 4	Class 5 Top TMP_c	LOW TG		HIGH TG_c
81	mmu-miR-30a-5p	miR-30abcdef/30abe-5p/384-5p	GUAAACA	27.6	SLOW	SLOW	1439.03	17.539	3.56696	0.0850196	0.00870786	387	9	2	5132.96	122.346	12.5309	class 1 (bottom)	Class 1 Bottom	Class 1 Bottom			LOW TG_c		HIGH	82.407	62.288	1.485	0.1521
82	mmu-miR-30b-5p	miR-30abcdef/30abe-5p/384-5p	GUAAACA	12.5		OTHER	72.5863	15.299	70.7154	9.89032	4.61265	387	67	19	5132.96	717.901	334.815	class 2	Class 3	Class 4		HIGH TG_c	HIGH TG_c			72.019	71.272	9.968	4.649			HIGH
83	mmu-miR-30c-5p	miR-30abcdef/30abe-5p/384-5p	GUAAACA	16.2		OTHER	225.533	27.812	22.7593	2.95131	1.22098	387	68	17	5132.96	665.617	275.37	class 2	Class 2	Class 3			HIGH TG_c			130.881	39.218	5.086	2.104
84	mmu-miR-30d-5p	miR-30abcdef/30abe-5p/384-5p	GUAAACA	15.7		OTHER	1175.28	15.299	4.36744	0.10494	0.010662	387	11	2	5132.96	123.333	12.5309	class 1 (bottom)	Class 1 Bottom	Class 1 Bottom			LOW TG_c		HIGH	72.019	71.272	1.713	0.174
85	mmu-miR-30e-5p	miR-30abcdef/30abe-5p/384-5p	GUAAACA	48	SLOW	SLOW	588.393	10.273	8.72369	0.400756	0.151385	387	27	6	5132.96	235.802	89.0741	class 1 (bottom)	Class 1 Bottom	Class 2					HIGH	48.475	105.89	4.864	1.8375
86	mmu-miR-31-5p	miR-31	GGCAAGA	13.5		OTHER	1104.53	116.976	5.36481	0.365329	0.0264342	469	48	8	5925.62	403.519	29.1975	class 1 (bottom)	Class 1 Bottom	Class 1 Bottom				HIGH	HIGH	550.186	10.77	0.733	0.0531	LOW	LOW	LOW
87	mmu-miR-320-3p	miR-320abcd/4429	AAAGCUG	9.94	FAST	FAST	22.3208	0.823	204.93	35.2492	11.3054	233	49	11	4574.2	786.79	252.346	class 3	Class 4	Class 5 Top TMP_c		HIGH TG_c	HIGH TG_c	LOW		3.809	1200.98	206.576	66.2548	HIGH	HIGH	HIGH
88	mmu-miR-322-5p	miR-15abc/16/16abc/195/322/424/497/1907	AGCAGCA	10.6		OTHER	145.201	8.961	96.4093	7.2679	1.32766	877	116	16	13998.8	1055.31	192.778	class 3	Class 3	Class 3	HIGH TG	HIGH TG_c	HIGH TG_c			42.242	331.394	24.982	4.5636	HIGH		HIGH
89	mmu-miR-328-3p	miR-328a/328b-3p	UGGCCCU	9.95	FAST	FAST	4.93951		1911.9	115.284	37.9655	682	67	21	9443.83	569.444	187.531	class 5 (top)	Class 5 Top TMP_c	Class 5 Top TMP_c	HIGH TG		HIGH TG_c		LOW
90	mmu-miR-335-5p	miR-335/335-5p	CAAGAGC	4.66	FAST	FAST	12.4157	0.58	471.88	2.8041	0.805434	366	7	3	5858.7	34.8148	10	class 4	Class 2	Class 3		LOW TG_c	LOW TG_c	LOW		2.77	2115.07	12.569	3.6101	HIGH		HIGH
91	mmu-miR-342-3p	miR-342-3p	CUCACAC	17.5		OTHER	18.6895		315.88	20.9267	5.93519	421	17	3	5903.64	391.111	110.926	class 4	Class 4	Class 4			HIGH TG_c
92	mmu-miR-344b-3p	miR-344b	AUUUAGC	10.9		OTHER	4.84291		360.167	2.72767	1.45306	114	4	1	1744.26	13.2099	7.03704	class 4	Class 2	Class 3	LOW TG	LOW TG_c	LOW TG_c		LOW
93	mmu-miR-344d-3p	miR-410/344de/344b-1-3p	AUAUAAC	15.9		OTHER	1.99176		579.673	48.0995	2.82026	61	6	2	1154.57	95.8025	5.61728	class 4	Class 4	Class 4	LOW TG	LOW TG_c	LOW TG_c		LOW
94	mmu-miR-34a-5p	miR-34ac/34bc-5p/449abc/449c-5p	GGCAGUG	48	SLOW	SLOW	2.76889	5.747	4024.45	248.707	99.3846	834	95	18	11143.3	688.642	275.185	class 5 (top)	Class 5 Top TMP_c	Class 5 Top TMP_c	HIGH TG	HIGH TG_c	HIGH TG_c		LOW	27.007	412.603	25.498	10.1893	HIGH	HIGH	HIGH
95	mmu-miR-34c-5p	miR-34ac/34bc-5p/449abc/449c-5p	GGCAGUG	29.9		OTHER	18.0142		618.584	26.9267	5.82532	834	56	7	11143.3	485.062	104.938	class 4	Class 4	Class 4	HIGH TG
96	mmu-miR-351-5p	miR-125a-5p/125b-5p/351/670/4319	CCCUGAG	12.7		OTHER	160.685	9.072	42.6024	3.76398	0.818257	669	72	14	6845.56	604.815	131.481	class 2	Class 3	Class 3			HIGH TG_c			42.588	160.738	14.201	3.0873
97	mmu-miR-361-5p	miR-361-5p	UAUCAGA	20.7		OTHER	6.64108		588.974	51.2244	16.5636	221	33	12	3911.42	340.185	110	class 4	Class 5 Top TMP_c	Class 5 Top TMP_c
98	mmu-miR-365-3p	miR-33a-3p/365/365-3p	AAUGCCC	48	SLOW	SLOW	27.8971	33.874	209.635	18.1598	2.02464	335	51	8	5848.21	506.605	56.4815	class 3	Class 4	Class 4						159.274	36.718	3.181	0.3546
99	mmu-miR-378a-3p	miR-378/422a/378bcdefhi	CUGGACU	15.5		OTHER	15.1563		391.061	25.1861	3.53926	398	42	10	5927.04	381.728	53.642	class 4	Class 4	Class 4
100	mmu-miR-421-3p	miR-421	UCAACAG	28.1		OTHER	61.4611	15.695	94.205	7.02944	1.08068	314	45	9	5789.94	432.037	66.4198	class 3	Class 3	Class 3						73.751	78.507	5.858	0.9006
101	mmu-miR-423-5p	miR-423a/423-5p/3184/3573-5p	GAGGGGC	35.5	SLOW	SLOW	171.141	9.61	76.9528	2.1872	0.301534	838	29	3	13169.8	374.321	51.6049	class 2	Class 2	Class 2	HIGH TG					45.358	290.351	8.253	1.1377
102	mmu-miR-425-5p	miR-425/425-5p/489	AUGACAC	9.48		OTHER	20.0249		279.214	7.90066	1.47039	287	27	3	5591.23	158.21	29.4444	class 4	Class 3	Class 3
103	mmu-miR-450b-5p	miR-450b-5p.m	UUUGCAG	48		OTHER	21.6236		263.766	16.4315	3.04023	206	34	10	5703.58	355.309	65.7407	class 3	Class 3	Class 4
104	mmu-miR-466b-3p	miR-466bcp-3p	UACAUAC	5.07	FAST	FAST	6.5096	0.489	754.109	354.386	174.339	292	274	154	4908.95	2306.91	1134.88	class 5 (top)	Class 5 Top TMP_c	Class 5 Top TMP_c		HIGH TG_c	HIGH TG_c	LOW		2.424	2025.37	951.804	468.236	HIGH	HIGH	HIGH
105	mmu-miR-466h-5p	miR-466h-5p/466j/466m-5p/669m-5p	GUGUGCA	8.76		OTHER	2.34937		4738.82	343.46	65.7125	698	81	30	11133.2	806.914	154.383	class 5 (top)	Class 5 Top TMP_c	Class 5 Top TMP_c	HIGH TG	HIGH TG_c	HIGH TG_c		LOW
106	mmu-miR-467c-5p	miR-467cd/1420ef	AAGUGCG	11.7		OTHER	7.21576		145.07	15.732	0.461952	116	8	2	1046.79	113.519	3.33333	class 3	Class 3	Class 2	LOW TG	LOW TG_c	LOW TG_c
107	mmu-miR-484	miR-344a-5p/484/3155/3155b	CAGGCUC	21.1		OTHER	74.3038		117.711	9.70823	0.706974	638	92	13	8746.36	721.358	52.5309	class 3	Class 3	Class 3		HIGH TG_c
108	mmu-miR-486a-5p	miR-486-5p/3107	CCUGUAC	26.1		OTHER	7.62794		523.862	56.2098	10.4878	317	64	18	3995.99	428.765	80	class 4	Class 5 Top TMP_c	Class 5 Top TMP_c
109	mmu-miR-501-3p	miR-501-3p/502-3p/500/502a	AUGCACC	7.93	FAST	FAST	3.73479	2.786	1250.29	91.7135	3.75184	278	28	3	4669.57	342.531	14.0123	class 5 (top)	Class 5 Top TMP_c	Class 4				LOW	LOW	13.157	354.901	26.033	1.065	HIGH	HIGH
110	mmu-miR-532-5p	miR-532-5p/511	AUGCCUU	12.3	FAST	FAST	38.6633	2.78	92.8465	8.67413	0.705681	260	18	3	3589.75	335.37	27.284	class 3	Class 3	Class 3				LOW		13.157	272.832	25.489	2.0737		HIGH
111	mmu-miR-574-3p	miR-574-3p	ACGCUCA	7.35	FAST	FAST	11.3879	6.797	183.208	12.2992	3.34446	150	20	4	2086.36	140.062	38.0864	class 3	Class 3	Class 4	LOW TG					31.855	65.496	4.397	1.1956
112	mmu-miR-652-3p	miR-652	AUGGCGC	7.25	FAST	FAST	1.63736	4.762	1170.25	40.7538	3.016	171	7	1	1916.11	66.7284	4.93827	class 5 (top)	Class 4	Class 4	LOW TG	LOW TG_c	LOW TG_c		LOW	22.506	85.138	2.965	0.2194
113	mmu-miR-6539	NOT PRESENT		8.38		OTHER	2.70651																		LOW
114	mmu-miR-6540-5p	NOT PRESENT		48	SLOW	SLOW	0.605064																		LOW
115	mmu-miR-664-5p	NOT PRESENT		13.8		OTHER	1.17975																		LOW
116	mmu-miR-669c-5p	miR-669c	UAGUUGU	7.48	FAST	FAST	3.36056	0.489	799.232	22.1891	2.00217	142	9	2	2685.86	74.5679	6.7284	class 5 (top)	Class 4	Class 4	LOW TG	LOW TG_c	LOW TG_c	LOW	LOW	2.424	1108.15	30.766	2.7761	HIGH	HIGH
117	mmu-miR-676-3p	miR-676.m	CGUCCUG	18.7		OTHER	1.87531		851.58	16.5569	10.5991	168	9	4	1596.98	31.0494	19.8765	class 5 (top)	Class 4	Class 5 Top TMP_c	LOW TG	LOW TG_c			LOW
118	mmu-miR-6944-3p	NOT PRESENT		48	SLOW	SLOW	2.22533																		LOW
119	mmu-miR-744-5p	miR-744/1716	GCGGGGC	13.9		OTHER	46.7172		142.941	1.94895	0.306547	381	14	2	6677.78	91.0494	14.321	class 3	Class 2	Class 2		LOW TG_c
120	mmu-miR-7a-5p	miR-7/7ab	GGAAGAC	18.3		OTHER	3.0813		2298.18	83.6789	20.2737	427	30	5	7081.36	257.84	62.4691	class 5 (top)	Class 5 Top TMP_c	Class 5 Top TMP_c					LOW
121	mmu-miR-872-5p	miR-872/1421acal	AGGUUAC	23.9		OTHER	86.1436		37.3981	2.54241	0.018631	190	18	2	3221.6	219.012	1.60494	class 2	Class 2	Class 1 Bottom			LOW TG_c
122	mmu-miR-877-5p	miR-877	UAGAGGA	14		OTHER	6.141		502.522	3.18643	1.14591	245	9	1	3085.99	19.5679	7.03704	class 4	Class 2	Class 3		LOW TG_c	LOW TG_c
123	mmu-miR-92a-3p	miR-25/32/92abc/363/363-3p/367	AUUGCAC	48	SLOW	SLOW	2284.29	53.038	1.485	0.00664767	0.00129711	314	7	2	3392.16	15.1852	2.96296	class 1 (bottom)	Class 1 Bottom	Class 1 Bottom		LOW TG_c	LOW TG_c	HIGH	HIGH	249.644	13.588	0.061	0.0119	LOW	LOW	LOW
124	mmu-miR-92b-3p	miR-25/32/92abc/363/363-3p/367	AUUGCAC	35.4		OTHER	12.5934		269.361	1.26953	0.23528	314	7	2	3392.16	15.9877	2.96296	class 4	Class 2	Class 2		LOW TG_c	LOW TG_c
125	mmu-miR-93-5p	miR-17/17-5p/20ab/20b-5p/93/106ab/427/518a-3p/519d	AAAGUGC	28	SLOW	SLOW	75.4252	18.4	42.4671	0.932983	0.189052	332	19	3	3203.09	70.3704	14.2593	class 2	Class 2	Class 2		LOW TG_c				86.562	37.004	0.813	0.1647		LOW
126	mmu-miR-96-5p	miR-96/507/1271	UUGGCAC	17.7		OTHER	7.51924	3.935	744.009	54.5596	13.5373	391	40	13	5594.38	410.247	101.79	class 4	Class 5 Top TMP_c	Class 5 Top TMP_c						18.351	304.853	22.355	5.5468			HIGH
127	mmu-miR-98-5p	let-7/98/4458/4500	GAGGUAG	12.2		OTHER	93.4803		58.3743	4.12776	0.396201	429	28	7	5456.85	385.864	37.037	class 2	Class 3	Class 2
128	mmu-miR-99a-5p	miR-99ab/100	ACCCGUA	48	SLOW	SLOW	5.8854	1.764	217.582	0.251721		156	2		1280.56	1.48148		class 3	Class 1 Bottom		LOW TG	LOW TG_c		LOW		8.31	154.1	0.178			LOW
129	mmu-miR-99b-5p	miR-99ab/100	ACCCGUA	10.9	FAST	FAST	589.331	46.742	2.1729			156			1280.56			class 1 (bottom)			LOW TG				HIGH	219.867	5.824			LOW

## Sheet: table TPM
TPM_seed	Mean T1/2 (h)	s.e.m. (h)	Mean TPM_s	s.e.m. TPM_s	Mean #TG_s	s.e.m. #TG	mean TG_CPC 'seed'	s.e.m. CPC
class 1 (bottom)	29.7023	3.14373	4.358	0.632829	389.773	43.1544	5263.89	637.695
class 2	20.2735	2.30822	38.947	3.91946	414.808	32.7994	5820.98	558.86
class 3	25.9956	2.97784	156.448	10.4943	396.185	38.6601	5765.56	613.187
class 4	23.0073	2.78064	460.765	26.7788	349.308	41.2944	5311.44	653.012
class 5 (top)	16.1609	2.59888	2126.35	362.638	485.091	51.3628	7360.93	778.62
ALL (n=72)	19.6785	1.16188	600.043	149.219	403.29	23.0022	6032.07	352.98
FAST (n=25)	8.8272	0.4687	586.756	142.097	376.417	47.1144	5607.68	774.611
SLOW (n=32)	42.3031	1.3832	286.904	134.784	431.667	40.3796	5735.41	641.241
TPM_3c (<-.03)	Mean T1/2 (h)	s.e.m. (h)	Mean TPM_3c.03	s.e.m. TPM_3c.03	Mean #TG_3c0.03	s.e.m. #TG	mean TG_CPC '3c.03'	s.e.m. CPC
class 1 (bottom)	29.7968	3.12204	0.217	0.0335366	29.8182	4.47341	253.577	40.2044
class 2	21.2435	2.47482	1.8014	0.160896	29.6923	3.81001	277.92	43.4577
class 3	21.9262	2.76718	8.8026	0.845007	43.0769	5.53782	413.3	73.4491
class 4	26.2615	3.17317	29.7042	1.9913	44.6923	6.06041	467.232	61.3818
class 5 (top)	16.5695	2.27326	138.174	21.0477	67.6364	12.8253	684.93	116.593
ALL (n=72)	19.6785	1.16188	34.4311	8.05097	39.087	2.95654	385.81	30.189
FAST (n=25)	8.8272	0.4687	51.188	16.449	54.5217	13.336	582.861	135.087
SLOW (n=32)	42.3031	1.3832	17.985	8.30399	41.5667	5.37762	358.008	55.0019
TPM_3c (<-.05)	Mean T1/2 (h)	s.e.m. (h)	Mean TPM_3c.05	s.e.m. TPM_3c.05	Mean #TG_3c.05	s.e.m. #TG	mean TG_CPC '3c.05'	s.e.m. CPC
class 1 (bottom)	28.6364	3.01203	0.019	0.00299636	6.18182	0.945796	27.724	9.25909
class 2	23.5571	2.73803	0.2229	0.0223963	5.95833	0.77665	52.536	15.3901
class 3	19.4204	2.56128	1.0896	0.0783675	9.58333	1.18248	68.2	14.7259
class 4	26.7756	3.13334	4.2364	0.370033	9.37037	1.46774	74.09	14.4635
class 5 (top)	17.0155	2.40453	35.8976	8.42971	21.6818	6.81302	199.571	50.826
ALL (n=72)	19.6785	1.16188	7.0297	1.80849	8.71014	0.702905	71.422	9.55781
FAST (n=25)	8.8272	0.4687	14.3375	8.24328	19.2857	7.32807	155.17	56.386
SLOW (n=32)	42.3031	1.3832	5.1694	3.40363	8.03448	1.26285	59.029	12.5049
