# Supplementary material for: Degradation dynamics of microRNAs revealed by a novel pulse-chase approach
Source: HighWire-hosted journal article supplement (doi:10.1101/gr.198788.115), 2016-01-28
Supplement: TABLE_S4_IsomiRs.xlsx [file TABLE_S4_IsomiRs.xlsx]

## Sheet: Sheet1
miRNA name (miRBase21)	Half Life (FINAL)	Decay class	ALL (4SU_0h)	ALL (TOT_4SU)	ALL (TOT_UNT)	miRNA name (miRBase21)	3'NT_0h_4sU (A-form)	3'NT_Tot_4sU (A-form)	3'NT_Tot_Unt (A-form)	3'NT_0h_4sU (C-form)	3'NT_Tot_4sU (C-form)	3'NT_Tot_Unt (C-form)	3'NT_0h_4sU (G-form)	3'NT_Tot_4sU (G-form)	3'NT_Tot_Unt (G-form)	3'NT_0h_4sU (U-form)	3'NT_Tot_4sU (U-form)	3'NT_Tot_Unt (U-form)	3'NT_0h_4sU (mixed)	3'NT_Tot_4sU (mixed)	3'NT_Tot_Unt (mixed)	C-miR_0h_4sU (miRNA)	C-miR_Tot_4sU (miRNA)	C-miR_Tot_Unt (miRNA)	C-miR_0h_4sU (Templ)	C-miR_Tot_4sU (Templ)	C-miR_Tot_Unt (Templ)	5'-T/NT_0h_4sU (5'prime)	5'-T/NT_Tot_4sU (5'prime)	5'-T/NT_Tot_Unt (5'prime)	Trim._0h_4sU (trim)	Trim._Tot_4sU (trim)	Trim._Tot_Unt (trim)	miRNA name (miRBase21)	% (A-form) 0h_4sU	% (A-form) Tot_4sU	% (A-form) Tot_UNT	% (C-form) 0h_4sU	% (C-form) Tot_4sU	% (C-form) Tot_UNT	% (G-form) 0h_4sU	% (G-form) Tot_4sU	% (G-form) Tot_UNT	% (U-form) 0h_4sU	% (U-form) Tot_4sU	% (U-form) Tot_UNT	% (mixed) 0h_4sU	% (mixed) Tot_4sU	% (mixed) Tot_UNT
mmu-let-7a-5p	13	OTHER	136154	48001	28957	mmu-let-7a-5p	10446	4073	2387	116	65	20	174	89	46				673	408	198	106789	38187	23750	2844	919	540	51	23	17	15061	4237	1999	mmu-let-7a-5p	0.0767219	0.0848524	0.0824326	0.000851976	0.00135414	0.000690679	0.00127796	0.00185413	0.00158856	0	0	0	0.00494293	0.00849982	0.00683772
mmu-let-7b-5p	8.69	FAST	18810	7623	5480	mmu-let-7b-5p	3677	1644	1193				140	78	46				2148	1044	607	8993	3542	2793	1055	276	161				2797	1039	680	mmu-let-7b-5p	0.195481	0.215663	0.217701	0	0	0	0.00744285	0.0102322	0.00839416	0	0	0	0.114195	0.136954	0.110766
mmu-let-7c-5p	11.7	FAST	78412	29753	17382	mmu-let-7c-5p	4564	1861	1062	60	21	21	188	98	43				848	445	264	64022	24530	14548	2357	677	364				6373	2121	1080	mmu-let-7c-5p	0.0582054	0.0625483	0.0610977	0.000765189	0.000705811	0.00120815	0.00239759	0.00329379	0.00247382	0	0	0	0.0108147	0.0149565	0.0151881
mmu-let-7d-5p	14.6	OTHER	41729	20827	12069	mmu-let-7d-5p	1881	1293	894	40	30	21	99	59	28				352	234	146	31429	16003	9523	956	392	199	376	207	116	6596	2609	1142	mmu-let-7d-5p	0.0450766	0.0620829	0.0740741	0.000958566	0.00144044	0.00174	0.00237245	0.00283286	0.00231999	0	0	0	0.00843538	0.0112354	0.0120971
mmu-let-7e-5p	22.7	OTHER	48783	23979	15755	mmu-let-7e-5p	5783	3224	2369	131	74	36				1898	779	446	1172	670	436	28502	13836	9547	1185	674	556				10112	4722	2365	mmu-let-7e-5p	0.118545	0.134451	0.150365	0.00268536	0.00308603	0.00228499	0	0	0	0.038907	0.0324868	0.0283085	0.0240248	0.0279411	0.0276738
mmu-let-7f-5p	19.1	OTHER	613747	278673	145325	mmu-let-7f-5p	49849	15437	8364	986	514	262							1658	1042	446	487911	230458	123915	14681	5953	2389				58662	25269	9949	mmu-let-7f-5p	0.0812208	0.0553947	0.0575538	0.00160653	0.00184446	0.00180286	0	0	0	0	0	0	0.00270144	0.00373915	0.00306898
mmu-let-7g-5p	12.3	OTHER	27338	20004	14385	mmu-let-7g-5p	2580	2254	1791										147	160	138	21266	15465	11226	369	211	163	232	187	104	2744	1727	963	mmu-let-7g-5p	0.0943741	0.112677	0.124505	0	0	0	0	0	0	0	0	0	0.00537713	0.0079984	0.00959333
mmu-let-7i-5p	25.4	OTHER	285938	253537	146328	mmu-let-7i-5p	39004	40514	27077	97	111	66				4468	3002	1486	1202	1359	952	222783	195226	108930	324	217	138				18060	13108	7679	mmu-let-7i-5p	0.136407	0.159795	0.185043	0.000339234	0.000437806	0.000451041	0	0	0	0.0156258	0.0118405	0.0101553	0.00420371	0.00536016	0.00650593
mmu-miR-100-5p	7.93	FAST	18159	9533	11919	mmu-miR-100-5p	1522	606	754				411	169	181	240	33	26				12529	7213	9304	37	15	15				3420	1497	1639	mmu-miR-100-5p	0.0838152	0.0635687	0.0632603	0	0	0	0.0226334	0.0177279	0.0151858	0.0132166	0.00346166	0.00218139	0	0	0
mmu-miR-101b-3p	20	OTHER	592	2983	2750	mmu-miR-101b-3p																			592	2983	2750							mmu-miR-101b-3p	0	0	0	0	0	0	0	0	0	0	0	0	0	0	0
mmu-miR-103-3p	13.4	FAST	10797	12779	10047	mmu-miR-103-3p										449	477	346	248	260	215	7657	8840	6726	419	764	798				2024	2438	1962	mmu-miR-103-3p	0	0	0	0	0	0	0	0	0	0.0415856	0.0373269	0.0344381	0.0229693	0.0203459	0.0213994
mmu-miR-107-3p	27.8	OTHER	584	1037	902	mmu-miR-107-3p																75	81	81							509	956	821	mmu-miR-107-3p	0	0	0	0	0	0	0	0	0	0	0	0	0	0	0
mmu-miR-1191b-5p	29.1	OTHER	48	53	55	mmu-miR-1191b-5p																48	53	55										mmu-miR-1191b-5p	0	0	0	0	0	0	0	0	0	0	0	0	0	0	0
mmu-miR-1198-5p	17.1	OTHER	891	645	627	mmu-miR-1198-5p													78	50	46	299	198	214	297	268	265				217	129	102	mmu-miR-1198-5p	0	0	0	0	0	0	0	0	0	0	0	0	0.0875421	0.0775194	0.0733652
mmu-miR-1249-3p	10.6	FAST	732	256	312	mmu-miR-1249-3p																548	179	244							184	77	68	mmu-miR-1249-3p	0	0	0	0	0	0	0	0	0	0	0	0	0	0	0
mmu-miR-125a-5p	26.8	SLOW	80319	67079	67933	mmu-miR-125a-5p	2582	2588	2863	142	43	42				376	259	180	230	159	173	40729	46759	50088							36260	17271	14587	mmu-miR-125a-5p	0.0321468	0.0385814	0.0421445	0.00176795	0.000641035	0.000618256	0	0	0	0.00468133	0.00386112	0.00264967	0.00286358	0.00237034	0.00254663
mmu-miR-125b-5p	41.3	SLOW	52761	87028	90295	mmu-miR-125b-5p	8850	10322	13577	388	377	494							538	724	976	36458	70117	70582	445	390	382				6082	5098	4284	mmu-miR-125b-5p	0.167738	0.118606	0.150363	0.00735392	0.00433194	0.00547096	0	0	0	0	0	0	0.0101969	0.00831916	0.010809
mmu-miR-128-3p	21.1	OTHER	1938	2158	1505	mmu-miR-128-3p	251	250	249										188	219	139	1139	1296	894	128	102	63				232	291	160	mmu-miR-128-3p	0.129515	0.115848	0.165449	0	0	0	0	0	0	0	0	0	0.0970072	0.101483	0.0923588
mmu-miR-129-5p	16.1	OTHER	472	303	638	mmu-miR-129-5p	49	67	142													423	236	496										mmu-miR-129-5p	0.103814	0.221122	0.222571	0	0	0	0	0	0	0	0	0	0	0	0
mmu-miR-130a-3p	42	SLOW	5227	10533	11262	mmu-miR-130a-3p	96	1164	1685							143	779	1122				410	3245	3208							4578	5345	5247	mmu-miR-130a-3p	0.0183662	0.11051	0.149618	0	0	0	0	0	0	0.0273579	0.073958	0.0996271	0	0	0
mmu-miR-130b-3p	40.4	SLOW	2495	6936	7188	mmu-miR-130b-3p	613	2572	2681							395	1578	1623				425	1501	1606							1062	1285	1278	mmu-miR-130b-3p	0.245691	0.370819	0.372983	0	0	0	0	0	0	0.158317	0.227509	0.225793	0	0	0
mmu-miR-132-3p	13.5	OTHER	182	192	58	mmu-miR-132-3p																182	192	58										mmu-miR-132-3p	0	0	0	0	0	0	0	0	0	0	0	0	0	0	0
mmu-miR-138-5p	11.8	OTHER	102	193	170	mmu-miR-138-5p																102	193	170										mmu-miR-138-5p	0	0	0	0	0	0	0	0	0	0	0	0	0	0	0
mmu-miR-140-3p	7.78	FAST	14923	14472	7758	mmu-miR-140-3p	2816	3244	2007										2258	1633	729	259	218	132	9426	9259	4823				164	118	67	mmu-miR-140-3p	0.188702	0.224157	0.258701	0	0	0	0	0	0	0	0	0	0.15131	0.112839	0.0939675
mmu-miR-143-3p	11.8	OTHER	556831	594516	428516	mmu-miR-143-3p	88	326	264	565	797	689	518	547	419	58928	82272	59680	1328	3246	3142	278586	309878	199446	15468	36770	27696	3255	2892	1712	198095	157788	135468	mmu-miR-143-3p	0.000158037	0.000548345	0.00061608	0.00101467	0.00134059	0.00160787	0.000930264	0.000920076	0.000977793	0.105827	0.138385	0.139271	0.00238492	0.0054599	0.00733228
mmu-miR-145a-5p	13	OTHER	1686	2851	2096	mmu-miR-145a-5p	137	274	236													1311	2188	1629	124	201	95				114	188	136	mmu-miR-145a-5p	0.0812574	0.0961066	0.112595	0	0	0	0	0	0	0	0	0	0	0	0
mmu-miR-146b-5p	24	OTHER	12996	8056	1211	mmu-miR-146b-5p													357	261	42	176	136	30	12463	7659	1139							mmu-miR-146b-5p	0	0	0	0	0	0	0	0	0	0	0	0	0.02747	0.0323982	0.0346821
mmu-miR-148a-3p	10.7	OTHER	3213	5796	1385	mmu-miR-148a-3p										147	225	43	93	114	28	1640	3255	763	1333	2202	551							mmu-miR-148a-3p	0	0	0	0	0	0	0	0	0	0.0457516	0.0388199	0.0310469	0.0289449	0.0196687	0.0202166
mmu-miR-148b-3p	48	OTHER	7781	11233	10827	mmu-miR-148b-3p	387	598	669							5893	8378	7859	749	1151	1269	590	870	760	162	236	270							mmu-miR-148b-3p	0.0497365	0.053236	0.06179	0	0	0	0	0	0	0.757358	0.745838	0.725871	0.0962601	0.102466	0.117207
mmu-miR-149-5p	22.6	OTHER	2254	3022	1296	mmu-miR-149-5p	59	105	46							257	340	121				1156	1480	375							782	1097	754	mmu-miR-149-5p	0.0261757	0.0347452	0.0354938	0	0	0	0	0	0	0.11402	0.112508	0.0933642	0	0	0
mmu-miR-151-3p	27.9	OTHER	88818	77503	77105	mmu-miR-151-3p	11855	10965	12395				53	38	44	6139	3882	3066	5651	4102	3567	37084	32516	33183	14927	14095	13626	1882	1417	1021	11227	10488	10203	mmu-miR-151-3p	0.133475	0.141478	0.160755	0	0	0	0.000596726	0.000490304	0.00057065	0.0691189	0.0500884	0.039764	0.0636245	0.052927	0.0462616
mmu-miR-152-3p	6.34	FAST	3245	2219	1116	mmu-miR-152-3p	632	429	223							446	273	131	1816	1043	498	351	474	264										mmu-miR-152-3p	0.194761	0.19333	0.199821	0	0	0	0	0	0	0.137442	0.123028	0.117384	0.55963	0.470032	0.446237
mmu-miR-155-5p	12.3	FAST	2750	1872	1044	mmu-miR-155-5p													194	274	146	713	511	284	1601	872	382				242	215	232	mmu-miR-155-5p	0	0	0	0	0	0	0	0	0	0	0	0	0.0705455	0.146368	0.139847
mmu-miR-15a-5p	28.4	OTHER	981	3070	2200	mmu-miR-15a-5p																271	1095	954							710	1975	1246	mmu-miR-15a-5p	0	0	0	0	0	0	0	0	0	0	0	0	0	0	0
mmu-miR-15b-5p	37.5	SLOW	3246	4633	4060	mmu-miR-15b-5p																2633	3849	3536							613	784	524	mmu-miR-15b-5p	0	0	0	0	0	0	0	0	0	0	0	0	0	0	0
mmu-miR-16-5p	48	SLOW	76082	110794	87216	mmu-miR-16-5p	220	338	314										95	232	187	71415	105380	82964	1221	2279	1615				3131	2565	2136	mmu-miR-16-5p	0.00289162	0.00305071	0.00360026	0	0	0	0	0	0	0	0	0	0.00124865	0.00209398	0.0021441
mmu-miR-17-5p	38.2	SLOW	1309	3502	3451	mmu-miR-17-5p	135	295	407													1005	2629	2529	169	578	515							mmu-miR-17-5p	0.103132	0.0842376	0.117937	0	0	0	0	0	0	0	0	0	0	0	0
mmu-miR-181a-5p	26.3	SLOW	82351	86440	45472	mmu-miR-181a-5p	45	101	82							93	292	136	73	320	239	42929	53237	27390	3143	7657	5793				36068	24833	11832	mmu-miR-181a-5p	0.000546441	0.00116844	0.00180331	0	0	0	0	0	0	0.00112931	0.00337807	0.00299085	0.000886449	0.00370199	0.00525598
mmu-miR-181b-5p	28.8	SLOW	37372	28787	16125	mmu-miR-181b-5p	268	642	492										212	403	364	11709	10354	5191	4383	4821	3676				20800	12567	6402	mmu-miR-181b-5p	0.00717114	0.0223017	0.0305116	0	0	0	0	0	0	0	0	0	0.0056727	0.0139994	0.0225736
mmu-miR-181c-5p	45	OTHER	513	2791	1442	mmu-miR-181c-5p																256	921	375	178	1676	968				79	194	99	mmu-miR-181c-5p	0	0	0	0	0	0	0	0	0	0	0	0	0	0	0
mmu-miR-181d-5p	17.9	OTHER	2236	1765	809	mmu-miR-181d-5p																865	765	287	378	447	258				993	553	264	mmu-miR-181d-5p	0	0	0	0	0	0	0	0	0	0	0	0	0	0	0
mmu-miR-182-5p	9.05	FAST	245346	209835	116366	mmu-miR-182-5p	10190	15577	10483	62	76	70				6300	6664	3663	1668	2258	1586	61825	63342	39465	6579	5756	4546				158722	116162	56553	mmu-miR-182-5p	0.0415332	0.0742345	0.0900865	0.000252704	0.000362189	0.00060155	0	0	0	0.025678	0.0317583	0.0314783	0.00679856	0.0107608	0.0136294
mmu-miR-183-5p	17.3	OTHER	15160	13432	8358	mmu-miR-183-5p	126	148	106										1131	1094	1198	6119	5928	3602	6871	5540	2976				913	722	476	mmu-miR-183-5p	0.00831135	0.0110185	0.0126825	0	0	0	0	0	0	0	0	0	0.0746042	0.0814473	0.143336
mmu-miR-1839-5p	11.9	OTHER	826	463	322	mmu-miR-1839-5p																414	197	139	412	266	183							mmu-miR-1839-5p	0	0	0	0	0	0	0	0	0	0	0	0	0	0	0
mmu-miR-1843b-5p	11.7	OTHER	98	81	71	mmu-miR-1843b-5p																98	81	71										mmu-miR-1843b-5p	0	0	0	0	0	0	0	0	0	0	0	0	0	0	0
mmu-miR-186-5p	48	SLOW	12834	37318	38375	mmu-miR-186-5p	259	692	626										260	640	717	5139	16340	15160	6027	15027	16883				1149	4619	4989	mmu-miR-186-5p	0.0201808	0.0185433	0.0163127	0	0	0	0	0	0	0	0	0	0.0202587	0.0171499	0.018684
mmu-miR-191-5p	48	OTHER	70264	68415	66106	mmu-miR-191-5p	2892	2233	2139										1367	1570	1386	58773	56988	56332	5403	6417	5308				1829	1207	941	mmu-miR-191-5p	0.0411591	0.032639	0.0323571	0	0	0	0	0	0	0	0	0	0.0194552	0.0229482	0.0209663
mmu-miR-192-5p	48	SLOW	1416	3452	4304	mmu-miR-192-5p										45	66	54	77	83	137	1093	2865	3635	201	438	478							mmu-miR-192-5p	0	0	0	0	0	0	0	0	0	0.0317797	0.0191194	0.0125465	0.0543785	0.024044	0.0318309
mmu-miR-193a-3p	13.1	OTHER	53	2569	3234	mmu-miR-193a-3p																53	2569	3234										mmu-miR-193a-3p	0	0	0	0	0	0	0	0	0	0	0	0	0	0	0
mmu-miR-194-5p	33.5	OTHER	77	385	383	mmu-miR-194-5p																77	385	383										mmu-miR-194-5p	0	0	0	0	0	0	0	0	0	0	0	0	0	0	0
mmu-miR-1964-3p	48	SLOW	155	101	145	mmu-miR-1964-3p																155	101	145										mmu-miR-1964-3p	0	0	0	0	0	0	0	0	0	0	0	0	0	0	0
mmu-miR-196b-5p	10.8	OTHER	1739	1028	574	mmu-miR-196b-5p										212	95	34				1071	601	327	456	332	213							mmu-miR-196b-5p	0	0	0	0	0	0	0	0	0	0.121909	0.0924125	0.0592334	0	0	0
mmu-miR-1983	43.8	SLOW	427	879	440	mmu-miR-1983																375	767	383	52	112	57							mmu-miR-1983	0	0	0	0	0	0	0	0	0	0	0	0	0	0	0
mmu-miR-199a-3p	9.59	FAST	68663	103910	36303	mmu-miR-199a-3p	5695	10186	4369							1437	2769	788	932	1726	827	15848	21883	9210	441	568	234	942	1543	787	43368	65235	20088	mmu-miR-199a-3p	0.0829413	0.0980271	0.120348	0	0	0	0	0	0	0.0209283	0.0266481	0.0217062	0.0135735	0.0166105	0.0227805
mmu-miR-19b-3p	48	SLOW	75	1452	2033	mmu-miR-19b-3p																75	1452	2033										mmu-miR-19b-3p	0	0	0	0	0	0	0	0	0	0	0	0	0	0	0
mmu-miR-205-5p	7.83	FAST	3976	1132	135	mmu-miR-205-5p	1040	435	55										298	96	13	1235	257	31	1236	281	25				167	63	11	mmu-miR-205-5p	0.261569	0.384276	0.407407	0	0	0	0	0	0	0	0	0	0.0749497	0.0848057	0.0962963
mmu-miR-20a-5p	42.2	SLOW	538	1293	1546	mmu-miR-20a-5p																491	1085	1340	47	208	206							mmu-miR-20a-5p	0	0	0	0	0	0	0	0	0	0	0	0	0	0	0
mmu-miR-214-3p	4.55	FAST	12509	5109	3154	mmu-miR-214-3p													582	323	158	6434	2383	1624				1605	853	531	3888	1550	841	mmu-miR-214-3p	0	0	0	0	0	0	0	0	0	0	0	0	0.0465265	0.0632218	0.0500951
mmu-miR-218-5p	48	SLOW	579	1247	536	mmu-miR-218-5p																			579	1247	536							mmu-miR-218-5p	0	0	0	0	0	0	0	0	0	0	0	0	0	0	0
mmu-miR-21a-5p	48	SLOW	272086	859868	498196	mmu-miR-21a-5p	313	900	707	29309	93480	70147	57	123	101	121	506	293	4870	16154	11623	51323	177442	95818	178691	552335	310078	1454	4996	3103	5948	13932	6326	mmu-miR-21a-5p	0.00115037	0.00104667	0.00141912	0.10772	0.108714	0.140802	0.000209493	0.000143045	0.000202731	0.000444712	0.000588462	0.000588122	0.0178988	0.0187866	0.0233302
mmu-miR-22-3p	28	OTHER	214075	1234767	765370	mmu-miR-22-3p	1151	6465	5107	104	489	271										201112	1207918	748154	315	1699	1067				11393	18196	10771	mmu-miR-22-3p	0.00537662	0.00523581	0.00667259	0.000485811	0.000396026	0.000354077	0	0	0	0	0	0	0	0	0
mmu-miR-221-3p	16.3	OTHER	9073	11269	9779	mmu-miR-221-3p	92	186	151							879	1481	942	95	113	84	4272	4700	3637	216	358	379				3519	4431	4586	mmu-miR-221-3p	0.01014	0.0165055	0.0154413	0	0	0	0	0	0	0.0968809	0.131422	0.0963289	0.0104706	0.0100275	0.00858984
mmu-miR-222-3p	14.1	OTHER	51345	41205	32343	mmu-miR-222-3p													492	393	363	238	265	310	50495	40427	31605	120	120	65				mmu-miR-222-3p	0	0	0	0	0	0	0	0	0	0	0	0	0.00958224	0.00953768	0.0112234
mmu-miR-224-5p	9.23	FAST	150	148	154	mmu-miR-224-5p																			150	148	154							mmu-miR-224-5p	0	0	0	0	0	0	0	0	0	0	0	0	0	0	0
mmu-miR-23a-3p	22.7	OTHER	5418	6357	5311	mmu-miR-23a-3p	141	185	174										598	617	591	2030	2204	1687	2156	2901	2468				493	450	391	mmu-miR-23a-3p	0.0260244	0.0291018	0.0327622	0	0	0	0	0	0	0	0	0	0.110373	0.0970584	0.111278
mmu-miR-23b-3p	13	OTHER	14570	11485	7870	mmu-miR-23b-3p													6191	3803	3024	2215	2315	1187	5529	4751	3275				635	616	384	mmu-miR-23b-3p	0	0	0	0	0	0	0	0	0	0	0	0	0.424914	0.331128	0.384244
mmu-miR-24-3p	10.1	FAST	2537	2106	1863	mmu-miR-24-3p										702	608	586				981	833	736							854	665	541	mmu-miR-24-3p	0	0	0	0	0	0	0	0	0	0.276705	0.288699	0.314546	0	0	0
mmu-miR-25-3p	48	SLOW	46038	37161	31754	mmu-miR-25-3p	2822	3000	2794				125	120	100	926	625	383	629	559	411	32534	25507	23964	95	106	92				8907	7244	4010	mmu-miR-25-3p	0.0612972	0.0807298	0.0879889	0	0	0	0.00271515	0.00322919	0.00314921	0.0201138	0.0168187	0.0120615	0.0136626	0.0150427	0.0129433
mmu-miR-26a-5p	12.2	OTHER	185918	176925	117023	mmu-miR-26a-5p	3789	3769	2564	1416	408	228				6189	5409	2487	1842	1991	1444	159304	151121	101332	637	400	218				12741	13827	8750	mmu-miR-26a-5p	0.02038	0.0213028	0.0219102	0.00761626	0.00230606	0.00194833	0	0	0	0.0332889	0.0305723	0.0212522	0.00990759	0.0112534	0.0123395
mmu-miR-26b-5p	9.43	OTHER	15950	12505	10159	mmu-miR-26b-5p										513	333	215	1514	1868	1443	1504	999	685	11812	8846	7450				607	459	366	mmu-miR-26b-5p	0	0	0	0	0	0	0	0	0	0.032163	0.0266293	0.0211635	0.0949216	0.14938	0.142042
mmu-miR-27a-3p	48	OTHER	9755	17515	16796	mmu-miR-27a-3p																703	2759	2460							9052	14756	14336	mmu-miR-27a-3p	0	0	0	0	0	0	0	0	0	0	0	0	0	0	0
mmu-miR-27b-3p	21.9	OTHER	337053	444608	309201	mmu-miR-27b-3p	14969	20601	12151	560	1208	1454	1183	1474	768	15391	30040	22717	10811	14746	8635	102750	157018	113323	14637	16850	10834	486	277	256	176266	202394	139063	mmu-miR-27b-3p	0.0444114	0.0463352	0.0392981	0.00166146	0.002717	0.00470244	0.00350983	0.00331528	0.00248382	0.0456634	0.0675651	0.07347	0.0320751	0.0331663	0.0279268
mmu-miR-28a-5p	14.9	OTHER	6616	9804	7067	mmu-miR-28a-5p	1034	1561	1404													4764	7254	4975							818	989	688	mmu-miR-28a-5p	0.156288	0.159221	0.19867	0	0	0	0	0	0	0	0	0	0	0	0
mmu-miR-296-5p	14.9	OTHER	486	634	654	mmu-miR-296-5p																486	634	654										mmu-miR-296-5p	0	0	0	0	0	0	0	0	0	0	0	0	0	0	0
mmu-miR-298-5p	8.76	FAST	56498	48475	48851	mmu-miR-298-5p	82	121	160										83	132	156	23739	23751	25815	3689	3356	2677				28905	21115	20043	mmu-miR-298-5p	0.00145138	0.00249613	0.00327527	0	0	0	0	0	0	0	0	0	0.00146908	0.00272305	0.00319338
mmu-miR-29a-3p	31.3	SLOW	16956	49459	31029	mmu-miR-29a-3p	739	2284	1858	153	508	461	500	1067	839				489	1242	1052	9788	30899	17293	333	836	516	1265	2839	1519	3689	9784	7491	mmu-miR-29a-3p	0.0435834	0.0461797	0.0598795	0.00902335	0.0102711	0.0148571	0.0294881	0.0215734	0.0270392	0	0	0	0.0288393	0.0251117	0.0339038
mmu-miR-29b-3p	48	SLOW	65	1208	1090	mmu-miR-29b-3p																65	1208	1090										mmu-miR-29b-3p	0	0	0	0	0	0	0	0	0	0	0	0	0	0	0
mmu-miR-301a-3p	48	SLOW	243	9429	11442	mmu-miR-301a-3p																243	9429	11442										mmu-miR-301a-3p	0	0	0	0	0	0	0	0	0	0	0	0	0	0	0
mmu-miR-301b-3p	48	SLOW	44	472	343	mmu-miR-301b-3p																44	472	343										mmu-miR-301b-3p	0	0	0	0	0	0	0	0	0	0	0	0	0	0	0
mmu-miR-3057-5p	21.1	OTHER	894	814	806	mmu-miR-3057-5p													132	94	101	255	222	165	299	287	336				208	211	204	mmu-miR-3057-5p	0	0	0	0	0	0	0	0	0	0	0	0	0.147651	0.115479	0.12531
mmu-miR-30a-5p	27.6	SLOW	26732	108513	91196	mmu-miR-30a-5p				57	113	141							612	1868	1603	366	1649	1028	24880	99216	85215				817	5667	3209	mmu-miR-30a-5p	0	0	0	0.00213228	0.00104135	0.00154612	0	0	0	0	0	0	0.0228939	0.0172145	0.0175775
mmu-miR-30b-5p	12.5	OTHER	1253	4149	5026	mmu-miR-30b-5p																1253	4149	5026										mmu-miR-30b-5p	0	0	0	0	0	0	0	0	0	0	0	0	0	0	0
mmu-miR-30c-5p	16.2	OTHER	8105	13033	15949	mmu-miR-30c-5p													139	176	308	274	423	485	7692	12434	15156							mmu-miR-30c-5p	0	0	0	0	0	0	0	0	0	0	0	0	0.0171499	0.0135042	0.0193116
mmu-miR-30d-5p	15.7	OTHER	62279	78566	82302	mmu-miR-30d-5p	346	514	567	30	51	55				168	240	229	1771	1665	1729	2412	2499	2112	55508	70542	75046				2044	3055	2564	mmu-miR-30d-5p	0.00555564	0.00654227	0.00688926	0.000481703	0.000649136	0.000668271	0	0	0	0.00269754	0.00305476	0.00278244	0.0284366	0.0211924	0.021008
mmu-miR-30e-5p	48	SLOW	2727	33386	42490	mmu-miR-30e-5p													90	863	950				2637	32523	41540							mmu-miR-30e-5p	0	0	0	0	0	0	0	0	0	0	0	0	0.0330033	0.0258492	0.0223582
mmu-miR-31-5p	13.5	OTHER	112926	94496	66667	mmu-miR-31-5p	727	478	459				147	98	72				1248	1456	1243	90142	70148	49829	16155	16262	9895				4507	6054	5169	mmu-miR-31-5p	0.00643784	0.00505842	0.00688497	0	0	0	0.00130174	0.00103708	0.00107999	0	0	0	0.0110515	0.0154081	0.0186449
mmu-miR-320-3p	9.94	FAST	6099	2887	1655	mmu-miR-320-3p										521	209	93	1226	506	303	1841	918	479	1943	967	628				568	287	152	mmu-miR-320-3p	0	0	0	0	0	0	0	0	0	0.0854238	0.0723935	0.0561934	0.201017	0.175268	0.183082
mmu-miR-322-5p	10.6	OTHER	6845	13679	10728	mmu-miR-322-5p	123	259	241	69	132	114				1732	2599	1839	84	146	95	4837	10543	8439										mmu-miR-322-5p	0.0179693	0.0189341	0.0224646	0.0100804	0.00964983	0.0106264	0	0	0	0.253031	0.189999	0.171421	0.0122717	0.0106733	0.00885533
mmu-miR-328-3p	9.95	FAST	2915	1289	697	mmu-miR-328-3p	599	259	140							721	292	138	425	177	124	962	431	235							208	130	60	mmu-miR-328-3p	0.205489	0.200931	0.200861	0	0	0	0	0	0	0.247341	0.226532	0.197991	0.145798	0.137316	0.177905
mmu-miR-335-5p	4.66	FAST	3053	2881	675	mmu-miR-335-5p																1146	1451	326							1907	1430	349	mmu-miR-335-5p	0	0	0	0	0	0	0	0	0	0	0	0	0	0	0
mmu-miR-342-3p	17.5	OTHER	1350	1465	1410	mmu-miR-342-3p													196	216	246	450	417	349	704	832	815							mmu-miR-342-3p	0	0	0	0	0	0	0	0	0	0	0	0	0.145185	0.14744	0.174468
mmu-miR-344b-3p	10.9	OTHER	114	262	346	mmu-miR-344b-3p																114	262	346										mmu-miR-344b-3p	0	0	0	0	0	0	0	0	0	0	0	0	0	0	0
mmu-miR-344d-3p	15.9	OTHER	73	79	163	mmu-miR-344d-3p																73	79	163										mmu-miR-344d-3p	0	0	0	0	0	0	0	0	0	0	0	0	0	0	0
mmu-miR-34a-5p	48	SLOW	70	194	166	mmu-miR-34a-5p																70	194	166										mmu-miR-34a-5p	0	0	0	0	0	0	0	0	0	0	0	0	0	0	0
mmu-miR-34c-5p	29.9	OTHER	294	2015	538	mmu-miR-34c-5p																294	2015	538										mmu-miR-34c-5p	0	0	0	0	0	0	0	0	0	0	0	0	0	0	0
mmu-miR-351-5p	12.7	OTHER	50386	34096	52568	mmu-miR-351-5p	2554	2637	5849							5016	3203	6900	2343	1984	3450	7058	5565	13483	145	86	187				33270	20621	22699	mmu-miR-351-5p	0.0506887	0.0773405	0.111265	0	0	0	0	0	0	0.0995515	0.0939406	0.131259	0.046501	0.0581886	0.0656293
mmu-miR-361-5p	20.7	OTHER	550	847	793	mmu-miR-361-5p																292	453	407							258	394	386	mmu-miR-361-5p	0	0	0	0	0	0	0	0	0	0	0	0	0	0	0
mmu-miR-365-3p	48	SLOW	1110	1783	1796	mmu-miR-365-3p																930	1499	1550	180	284	246							mmu-miR-365-3p	0	0	0	0	0	0	0	0	0	0	0	0	0	0	0
mmu-miR-378a-3p	15.5	OTHER	605	942	1184	mmu-miR-378a-3p													119	107	112	114	245	303	372	590	769							mmu-miR-378a-3p	0	0	0	0	0	0	0	0	0	0	0	0	0.196694	0.113588	0.0945946
mmu-miR-421-3p	28.1	OTHER	3749	6353	4937	mmu-miR-421-3p	121	191	153													2620	4560	3502							1008	1602	1282	mmu-miR-421-3p	0.0322753	0.0300645	0.0309905	0	0	0	0	0	0	0	0	0	0	0	0
mmu-miR-423-5p	35.5	SLOW	22514	16140	14459	mmu-miR-423-5p	873	705	818							275	158	124	561	425	445	12921	9414	8314	3442	2473	2021				4442	2965	2737	mmu-miR-423-5p	0.0387759	0.0436803	0.0565738	0	0	0	0	0	0	0.0122146	0.00978934	0.00857597	0.0249178	0.0263321	0.0307767
mmu-miR-425-5p	9.48	OTHER	2497	2926	2380	mmu-miR-425-5p																192	318	251	369	801	1154				1936	1807	975	mmu-miR-425-5p	0	0	0	0	0	0	0	0	0	0	0	0	0	0	0
mmu-miR-450b-5p	48	OTHER	84	696	1886	mmu-miR-450b-5p																			84	696	1886							mmu-miR-450b-5p	0	0	0	0	0	0	0	0	0	0	0	0	0	0	0
mmu-miR-466b-3p	5.07	FAST	681	387	440	mmu-miR-466b-3p																			681	387	440							mmu-miR-466b-3p	0	0	0	0	0	0	0	0	0	0	0	0	0	0	0
mmu-miR-466h-5p	8.76	OTHER	101	113	178	mmu-miR-466h-5p																			101	113	178							mmu-miR-466h-5p	0	0	0	0	0	0	0	0	0	0	0	0	0	0	0
mmu-miR-467c-5p	11.7	OTHER	478	455	469	mmu-miR-467c-5p																478	455	469										mmu-miR-467c-5p	0	0	0	0	0	0	0	0	0	0	0	0	0	0	0
mmu-miR-484	21.1	OTHER	5647	8000	6958	mmu-miR-484										410	403	296	193	214	177	2853	3904	3377	720	1064	1249				1471	2415	1859	mmu-miR-484	0	0	0	0	0	0	0	0	0	0.0726049	0.050375	0.042541	0.0341774	0.02675	0.0254383
mmu-miR-486a-5p	26.1	OTHER	1658	1382	1046	mmu-miR-486a-5p	333	280	346							362	238	127	118	100	105	715	646	377							130	118	91	mmu-miR-486a-5p	0.200844	0.202605	0.330784	0	0	0	0	0	0	0.218335	0.172214	0.121415	0.0711701	0.0723589	0.100382
mmu-miR-501-3p	7.93	FAST	1806	403	211	mmu-miR-501-3p										100	13	11	176	23	17	1076	331	174							454	36	9	mmu-miR-501-3p	0	0	0	0	0	0	0	0	0	0.055371	0.0322581	0.0521327	0.0974529	0.057072	0.0805687
mmu-miR-532-5p	12.3	FAST	4150	5521	4607	mmu-miR-532-5p	776	1153	1149										239	303	225	2366	2711	2142	159	127	83				610	1227	1008	mmu-miR-532-5p	0.186988	0.208839	0.249403	0	0	0	0	0	0	0	0	0	0.0575904	0.0548814	0.0488387
mmu-miR-574-3p	7.35	FAST	2463	1281	1192	mmu-miR-574-3p	179	80	79													1487	785	692							797	416	421	mmu-miR-574-3p	0.0726756	0.0624512	0.0662752	0	0	0	0	0	0	0	0	0	0	0	0
mmu-miR-652-3p	7.25	FAST	1142	886	797	mmu-miR-652-3p	142	101	90							500	383	350				194	108	103							306	294	254	mmu-miR-652-3p	0.124343	0.113995	0.112923	0	0	0	0	0	0	0.437828	0.43228	0.439147	0	0	0
mmu-miR-6539	8.38	OTHER	1387	1940	1028	mmu-miR-6539																202	265	108							1185	1675	920	mmu-miR-6539	0	0	0	0	0	0	0	0	0	0	0	0	0	0	0
mmu-miR-6540-5p	48	SLOW	161	206	68	mmu-miR-6540-5p	121	141	48													40	65	20										mmu-miR-6540-5p	0.751553	0.684466	0.705882	0	0	0	0	0	0	0	0	0	0	0	0
mmu-miR-664-5p	13.8	OTHER	147	67	82	mmu-miR-664-5p																			147	67	82							mmu-miR-664-5p	0	0	0	0	0	0	0	0	0	0	0	0	0	0	0
mmu-miR-669c-5p	7.48	FAST	759	250	191	mmu-miR-669c-5p																307	76	40	452	174	151							mmu-miR-669c-5p	0	0	0	0	0	0	0	0	0	0	0	0	0	0	0
mmu-miR-676-3p	18.7	OTHER	510	277	42	mmu-miR-676-3p																373	210	36	66	22	4				71	45	2	mmu-miR-676-3p	0	0	0	0	0	0	0	0	0	0	0	0	0	0	0
mmu-miR-6944-3p	48	SLOW	1226	1166	498	mmu-miR-6944-3p	140	128	68							710	676	305	111	118	55	265	244	70										mmu-miR-6944-3p	0.114192	0.109777	0.136546	0	0	0	0	0	0	0.579119	0.57976	0.61245	0.0905383	0.101201	0.110442
mmu-miR-744-5p	13.9	OTHER	10891	8699	6895	mmu-miR-744-5p	111	146	166										124	133	135	3450	3309	2775							7206	5111	3819	mmu-miR-744-5p	0.0101919	0.0167835	0.0240754	0	0	0	0	0	0	0	0	0	0.0113855	0.0152891	0.0195794
mmu-miR-7a-5p	18.3	OTHER	321	128	248	mmu-miR-7a-5p																			321	128	248							mmu-miR-7a-5p	0	0	0	0	0	0	0	0	0	0	0	0	0	0	0
mmu-miR-872-5p	23.9	OTHER	1838	6089	5126	mmu-miR-872-5p																1636	5726	4714	202	363	412							mmu-miR-872-5p	0	0	0	0	0	0	0	0	0	0	0	0	0	0	0
mmu-miR-877-5p	14	OTHER	1402	755	522	mmu-miR-877-5p	237	91	100										347	171	99	85	45	20	733	448	303							mmu-miR-877-5p	0.169044	0.12053	0.191571	0	0	0	0	0	0	0	0	0	0.247504	0.22649	0.189655
mmu-miR-92a-3p	48	SLOW	381022	376760	337719	mmu-miR-92a-3p	491	1082	1217	344	313	254	1373	738	624	4494	3774	2136	170875	200635	201472	10609	10229	8855	191286	158459	121871				1550	1530	1290	mmu-miR-92a-3p	0.00128864	0.00287185	0.00360359	0.000902835	0.000830768	0.000752105	0.00360347	0.00195881	0.00184769	0.0117946	0.010017	0.00632478	0.448465	0.532527	0.596567
mmu-miR-92b-3p	35.4	OTHER	3651	2739	1522	mmu-miR-92b-3p	592	522	238							261	120	50	406	344	132	929	874	761							1463	879	341	mmu-miR-92b-3p	0.162147	0.190581	0.156373	0	0	0	0	0	0	0.0714873	0.0438116	0.0328515	0.111202	0.125593	0.086728
mmu-miR-93-5p	28	SLOW	8617	13982	10432	mmu-miR-93-5p	432	858	1013										87	129	136	2892	4045	3853	605	1013	832				4601	7937	4598	mmu-miR-93-5p	0.0501335	0.0613646	0.0971051	0	0	0	0	0	0	0	0	0	0.0100963	0.00922615	0.0130368
mmu-miR-96-5p	17.7	OTHER	294	646	365	mmu-miR-96-5p																294	646	365										mmu-miR-96-5p	0	0	0	0	0	0	0	0	0	0	0	0	0	0	0
mmu-miR-98-5p	12.2	OTHER	15534	8808	5879	mmu-miR-98-5p	1115	561	425							167	73	57				12930	7421	4977							1322	753	420	mmu-miR-98-5p	0.071778	0.0636921	0.0722912	0	0	0	0	0	0	0.0107506	0.00828792	0.00969553	0	0	0
mmu-miR-99a-5p	48	SLOW	281	658	176	mmu-miR-99a-5p																281	658	176										mmu-miR-99a-5p	0	0	0	0	0	0	0	0	0	0	0	0	0	0	0
mmu-miR-99b-5p	10.9	FAST	148340	64298	72215	mmu-miR-99b-5p	12259	9712	12326	118	84	100				7187	363	378	919	719	1017	81859	34942	39831	121	39	43				45877	18439	18520	mmu-miR-99b-5p	0.0826412	0.151047	0.170685	0.00079547	0.00130642	0.00138475	0	0	0	0.0484495	0.00564559	0.00523437	0.00619523	0.0111823	0.0140829
[truncated: 25 more columns]
