# Supplementary material for: Degradation dynamics of microRNAs revealed by a novel pulse-chase approach
Source: HighWire-hosted journal article supplement (doi:10.1101/gr.198788.115), 2016-01-28
Supplement: TABLE_S5_Serum_stimulation.xlsx [file TABLE_S5_Serum_stimulation.xlsx]

## Sheet: mature miRNA
ORDER	miRNA NAME (miRBase21)	guide?	Half Life (h)	Decay Class (2)	0h (AVE log2FC)	1h (AVE log2FC)	2h (AVE log2FC)	4h (AVE log2FC)	6h (AVE log2FC)	8h (AVE log2FC)	10h (AVE log2FC)	12h (AVE log2FC)	MIN	MAX	SERUM REG (final)	short name	0h log2T (EXP1)	1h log2T (EXP1)	2h log2T (EXP1)	4h log2T (EXP1)	6h log2 T (EXP1)	8h log2 T (EXP1)	10h log2T (EXP1)	12h log2T (EXP1)	MIN	MAX	SERUM REG (0.4)	0h log2T (EXP2)	1h log2T (EXP2)	2h log2T (EXP2)	4h log2T (EXP2)	6h log2 T (EXP2)	8h log2 T (EXP2)	10h log2T (EXP2)	12h log2T (EXP2)	MIN	MAX	SERUM REG (0.5)	short name
1	mmu-let-7b-5p	guide	8.69	FAST	0	0.12	-0.085	-0.15	-0.23	-0.355	-0.35	-0.7	0.12	-0.7	DOWN	let-7b-5p	0	0.19	-0.16	-0.14	-0.17	-0.32	-0.07	-0.72	0.19	-0.72	DOWN	0	0.05	-0.01	-0.16	-0.29	-0.39	-0.63	-0.68	0.05	-0.68	DOWN	let-7b-5p
2	mmu-miR-214-3p	guide	4.55	FAST	0	0.035	-0.27	-0.15	-0.145	-0.2	-0.385	-0.645	0.035	-0.645	DOWN	miR-214-3p	0	0.14	-0.29	-0.09	-0.11	-0.16	-0.31	-0.61	0.14	-0.61	DOWN	0	-0.07	-0.25	-0.21	-0.18	-0.24	-0.46	-0.68	0	-0.68	DOWN	miR-214-3p
3	mmu-miR-351-5p	guide	12.7		0	0.02	-0.065	-0.365	-0.4	-0.595	-0.67	-0.985	0.02	-0.985	DOWN	miR-351-5p	0	-0.01	0.07	-0.08	-0.23	-0.39	-0.2	-0.8	0.07	-0.8	DOWN	0	0.05	-0.2	-0.65	-0.57	-0.8	-1.14	-1.17	0.05	-1.17	DOWN	miR-351-5p
4	mmu-miR-503-5p	guide	3.2	FAST	0	-0.52	-1.535	-1.8	-1.19	-1.72	-1.17	-2.35	0	-2.35	DOWN	miR-503-5p	0	-0.52	-1.04	-1.46	-1.19	-1.41	-1.37	-2.67	0	-2.67	DOWN	0	-0.52	-2.03	-2.14		-2.03	-0.97	-2.03	0	-2.14	DOWN	miR-503-5p
5	mmu-miR-188-5p	guide			0	-0.14	-0.555	-0.685	-0.69	-0.48	-0.785	-0.625	0	-0.785	DOWN	miR-188-5p	0	0.08	-0.45	-0.9	-1.02	-0.49	-0.73	-0.34	0.08	-1.02	DOWN	0	-0.36	-0.66	-0.47	-0.36	-0.47	-0.84	-0.91	0	-0.91	DOWN	miR-188-5p
6	mmu-miR-30b-5p	guide	12.5		0	0.065	-0.26	-0.8	-0.95	-1.015	-1.13	-1.16	0.065	-1.16	DOWN	miR-30b-5p	0	0.13	-0.5	-0.95	-1.14	-1.2	-1.28	-1.22	0.13	-1.28	DOWN	0	0	-0.02	-0.65	-0.76	-0.83	-0.98	-1.1	0	-1.1	DOWN	miR-30b-5p
7	mmu-miR-30c-5p	guide	16.2		0	0.025	-0.36	-1.005	-1.37	-1.39	-1.34	-1.49	0.025	-1.49	DOWN	miR-30c-5p	0	-0.01	-0.54	-1.06	-1.59	-1.55	-1.45	-1.68	0	-1.68	DOWN	0	0.06	-0.18	-0.95	-1.15	-1.23	-1.23	-1.3	0.06	-1.3	DOWN	miR-30c-5p
8	mmu-miR-467a-5p	guide			0	-0.12	-0.44	-0.38	-0.33	-0.505	-0.36	-0.73	0	-0.73	DOWN	miR-467a-5p	0	-0.02	-0.35	-0.42	-0.35	-0.58	-0.35	-0.82	0	-0.82	DOWN	0	-0.22	-0.53	-0.34	-0.31	-0.43	-0.37	-0.64	0	-0.64	DOWN	miR-467a-5p
9	mmu-miR-193a-3p	guide	13.1		0	0.045	-0.885	-0.945	-0.735	-0.29	-1.085	-0.7	0.045	-1.085	DOWN	miR-193a-3p	0	0.27	-0.84	-1.4	-1.31	-0.47	-1.18	-0.75	0.27	-1.4	DOWN	0	-0.18	-0.93	-0.49	-0.16	-0.11	-0.99	-0.65	0	-0.99	DOWN	miR-193a-3p
10	mmu-miR-335-3p	pass (equlibrium)	7.2	FAST	0	0.19	0.105	-0.245	-0.5	-0.625	-0.695	-1.17	0.19	-1.17	DOWN	miR-335-3p	0	0.14	0.04	-0.2	-0.58	-0.62	-0.5	-1.15	0.14	-1.15	DOWN	0	0.24	0.17	-0.29	-0.42	-0.63	-0.89	-1.19	0.24	-1.19	DOWN	miR-335-3p
11	mmu-miR-196b-5p	N/A	10.8		0	0.01	-0.155	-0.48	-0.495	-0.525	-0.525	-0.68	0.01	-0.68	DOWN	miR-196b-5p	0	0.11	-0.04	-0.57	-0.65	-0.62	-0.43	-0.72	0.11	-0.72	DOWN	0	-0.09	-0.27	-0.39	-0.34	-0.43	-0.62	-0.64	0	-0.64	DOWN	miR-196b-5p
12	mmu-miR-324-5p	N/A			0	0.09	-0.47	-0.365	-0.205	-0.045	-0.385	-0.46	0.09	-0.47	DOWN	miR-324-5p	0	0.21	-0.48	-0.47	-0.22	0.22	0.11	-0.28	0.22	-0.48	DOWN	0	-0.03	-0.46	-0.26	-0.19	-0.31	-0.88	-0.64	0	-0.88	DOWN	miR-324-5p
13	mmu-miR-92b-3p	N/A	35.4		0	-0.005	0.18	0.105	0.06	-0.095	-0.19	-0.6	0.18	-0.6	DOWN	miR-92b-3p	0	0	0.21	0.25	0.15	0.11	0.08	-0.43	0.25	-0.43	DOWN	0	-0.01	0.15	-0.04	-0.03	-0.3	-0.46	-0.77	0.15	-0.77	DOWN	miR-92b-3p
14	mmu-let-7i-5p	guide	25.4		0	0.185	0.385	0.26	0.365	0.57	0.79	0.72	0.79	0	UP	let-7i-5p	0	0.16	0.44	0.26	0.48	0.6	0.79	0.67	0.79	0	UP	0	0.21	0.33	0.26	0.25	0.54	0.79	0.77	0.79	0	UP	let-7i-5p
15	mmu-miR-125a-5p	guide	26.8	SLOW	0	0.025	0.155	0.37	0.33	0.35	0.65	0.36	0.65	0	UP	miR-125a-5p	0	0.05	0.13	0.46	0.24	0.17	0.66	0.06	0.66	0	UP	0	0	0.18	0.28	0.42	0.53	0.64	0.66	0.66	0	UP	miR-125a-5p
16	mmu-miR-99b-5p	guide	10.9	FAST	0	0.28	0.26	0.31	0.515	0.495	0.68	0.445	0.68	0	UP	miR-99b-5p	0	0.3	0.27	0.36	0.55	0.39	0.69	0.3	0.69	0	UP	0	0.26	0.25	0.26	0.48	0.6	0.67	0.59	0.67	0	UP	miR-99b-5p
17	mmu-miR-143-3p	guide	11.8		0	0.175	0.28	0.145	0.28	0.51	0.37	0.45	0.51	0	UP	miR-143-3p	0	0.04	0.18	-0.06	0.14	0.46	0.14	0.51	0.51	-0.06	UP	0	0.31	0.38	0.35	0.42	0.56	0.6	0.39	0.6	0	UP	miR-143-3p
18	mmu-miR-22-3p	guide	28		0	0.005	0.12	0.38	0.465	0.555	0.745	0.625	0.745	0	UP	miR-22-3p	0	0.04	0.11	0.48	0.55	0.64	0.86	0.64	0.86	0	UP	0	-0.03	0.13	0.28	0.38	0.47	0.63	0.61	0.63	-0.03	UP	miR-22-3p
19	mmu-miR-24-3p	guide	10.1	FAST	0	0.01	0.15	0.21	0.25	0.255	0.52	0.305	0.52	0	UP	miR-24-3p	0	-0.01	0.02	0.21	0.27	0.24	0.42	0.33	0.42	-0.01	UP	0	0.03	0.28	0.21	0.23	0.27	0.62	0.28	0.62	0	UP	miR-24-3p
20	mmu-miR-149-5p	guide	22.6		0	0.595	1.345	2.57	2.92	2.885	2.655	2.53	2.92	0	UP	miR-149-5p	0	0.69	0.73	2	2.58	2.63	2.71	2.56	2.71	0	UP	0	0.5	1.96	3.14	3.26	3.14	2.6	2.5	3.26	0	UP	miR-149-5p
21	mmu-miR-155-5p	guide	12.3	FAST	0	0.015	1.515	2.675	2.6	2.375	2.445	2.19	2.675	0	UP	miR-155-5p	0	0.06	1.28	2.49	2.5	2.37	2.49	2.1	2.5	0	UP	0	-0.03	1.75	2.86	2.7	2.38	2.4	2.28	2.86	-0.03	UP	miR-155-5p
22	mmu-miR-17-5p	guide	38.2	SLOW	0	-0.02	-0.08	0.27	0.515	0.765	0.985	1.14	1.14	-0.08	UP	miR-17-5p	0	0.14	0	0.33	0.49	0.74	0.89	0.98	0.98	0	UP	0	-0.18	-0.16	0.21	0.54	0.79	1.08	1.3	1.3	-0.18	UP	miR-17-5p
23	mmu-miR-19b-3p	guide	48	SLOW	0	-0.115	-0.105	-0.37	-0.16	0.14	0.25	0.6	0.6	-0.37	UP	miR-19b-3p	0	-0.32	-0.37	-0.83	-0.78	-0.31	-0.73	0.31	0.31	-0.83	UP	0	0.09	0.16	0.09	0.46	0.59	1.23	0.89	1.23	0	UP	miR-19b-3p
24	mmu-miR-20a-5p	guide	42.2	SLOW	0	-0.075	-0.015	0.135	0.305	0.53	0.64	0.87	0.87	-0.075	UP	miR-20a-5p	0	0.07	0.18	0.03	-0.03	0.42	0.31	0.78	0.78	-0.03	UP	0	-0.22	-0.21	0.24	0.64	0.64	0.97	0.96	0.97	-0.22	UP	miR-20a-5p
25	mmu-miR-92a-3p	guide	48	SLOW	0	0.11	0.08	0.33	0.455	0.59	0.725	0.78	0.78	0	UP	miR-92a-3p	0	0.2	0.12	0.35	0.58	0.71	0.81	0.74	0.81	0	UP	0	0.02	0.04	0.31	0.33	0.47	0.64	0.82	0.82	0	UP	miR-92a-3p
26	mmu-miR-21a-5p	guide	48	SLOW	0	0.06	0.235	0.065	0.29	0.625	0.54	0.81	0.81	0	UP	miR-21a-5p	0	-0.01	0.22	-0.23	0.01	0.5	0.14	0.83	0.83	-0.23	UP	0	0.13	0.25	0.36	0.57	0.75	0.94	0.79	0.94	0	UP	miR-21a-5p
27	mmu-miR-29a-3p	guide	31.3	SLOW	0	0.04	0.155	0.58	0.75	0.94	1.145	1.105	1.145	0	UP	miR-29a-3p	0	0.1	-0.01	0.43	0.52	0.75	0.91	0.85	0.91	-0.01	UP	0	-0.02	0.32	0.73	0.98	1.13	1.38	1.36	1.38	-0.02	UP	miR-29a-3p
28	mmu-miR-29b-3p	guide	48	SLOW	0	-0.155	-0.16	-0.17	0.19	0.685	0.325	0.88	0.88	-0.17	UP	miR-29b-3p	0	-0.3	-0.57	-0.79	-0.63	0.23	-0.65	0.63	0.63	-0.79	UP	0	-0.01	0.25	0.45	1.01	1.14	1.3	1.13	1.3	-0.01	UP	miR-29b-3p
29	mmu-miR-31-5p	guide	13.5		0	0.125	0.175	0.29	0.385	0.55	0.775	0.685	0.775	0	UP	miR-31-5p	0	0.25	0.31	0.33	0.5	0.69	0.96	0.73	0.96	0	UP	0	0	0.04	0.25	0.27	0.41	0.59	0.64	0.64	0	UP	miR-31-5p
30	mmu-miR-365-3p	guide	48	SLOW	0	0.18	0.23	0.405	0.45	0.41	0.69	0.495	0.69	0	UP	miR-365-3p	0	0.2	0.18	0.47	0.46	0.32	0.75	0.35	0.75	0	UP	0	0.16	0.28	0.34	0.44	0.5	0.63	0.64	0.64	0	UP	miR-365-3p
31	mmu-miR-125b-5p	guide	41.3	SLOW	0	0.15	0.175	0.38	0.435	0.49	0.86	0.6	0.86	0	UP	miR-125b-5p	0	0.15	0.07	0.5	0.34	0.25	0.78	0.27	0.78	0	UP	0	0.15	0.28	0.26	0.53	0.73	0.94	0.93	0.94	0	UP	miR-125b-5p
32	mmu-miR-221-3p	guide	16.3		0	0.26	0.41	0.44	0.52	0.665	0.92	0.89	0.92	0	UP	miR-221-3p	0	0.37	0.63	0.43	0.46	0.58	0.87	0.78	0.87	0	UP	0	0.15	0.19	0.45	0.58	0.75	0.97	1	1	0	UP	miR-221-3p
33	mmu-miR-222-3p	guide	14.1		0	0.13	0.24	0.765	1.015	1.43	1.39	1.615	1.615	0	UP	miR-222-3p	0	0.15	0.44	0.63	0.88	1.42	1.43	1.64	1.64	0	UP	0	0.11	0.04	0.9	1.15	1.44	1.35	1.59	1.59	0	UP	miR-222-3p
34	mmu-miR-30a-5p	guide	27.6	SLOW	0	0.05	0.105	-0.03	0.145	0.445	0.51	0.68	0.68	-0.03	UP	miR-30a-5p	0	0	0.05	-0.1	0.16	0.44	0.31	0.67	0.67	-0.1	UP	0	0.1	0.16	0.04	0.13	0.45	0.71	0.69	0.71	0	UP	miR-30a-5p
35	mmu-miR-100-5p	guide	7.93	FAST	0	0.325	0.32	0.265	0.4	0.455	0.585	0.335	0.585	0	UP	miR-100-5p	0	0.29	0.22	0.27	0.29	0.18	0.47	0.05	0.47	0	UP	0	0.36	0.42	0.26	0.51	0.73	0.7	0.62	0.73	0	UP	miR-100-5p
36	mmu-miR-151-3p	guide	27.9		0	0.14	0.235	0.285	0.405	0.485	0.63	0.495	0.63	0	UP	miR-151-3p	0	0.16	0.27	0.34	0.49	0.6	0.74	0.54	0.74	0	UP	0	0.12	0.2	0.23	0.32	0.37	0.52	0.45	0.52	0	UP	miR-151-3p
37	mmu-miR-296-5p	guide	14.9		0	-0.3	-0.18	-0.205	0.325	0.37	0.45	0.505	0.505	-0.3	UP	miR-296-5p	0	-0.57	-0.53	-0.01	0.38	0.22	0.35	0.42	0.42	-0.57	UP	0	-0.03	0.17	-0.4	0.27	0.52	0.55	0.59	0.59	-0.4	UP	miR-296-5p
38	mmu-miR-501-3p	guide	7.93	FAST	0	0.21	0.02	0.375	0.48	0.39	0.525	0.265	0.525	0	UP	miR-501-3p	0	0.18	0.06	0.52	0.59	0.24	0.6	0.09	0.6	0	UP	0	0.24	-0.02	0.23	0.37	0.54	0.45	0.44	0.54	-0.02	UP	miR-501-3p
39	mmu-miR-423-5p	guide	35.5	SLOW	0	-0.045	0.19	0.56	0.545	0.64	0.65	0.58	0.65	-0.045	UP	miR-423-5p	0	-0.07	0.35	0.69	0.63	0.78	0.87	0.62	0.87	-0.07	UP	0	-0.02	0.03	0.43	0.46	0.5	0.43	0.54	0.54	-0.02	UP	miR-423-5p
40	mmu-miR-194-5p	guide	33.5		0	0.12	0.015	0.015	0.14	0.39	0.51	0.28	0.51	0	UP	miR-194-5p	0	0.08	-0.2	-0.19	0.07	0.45	0.37	0.23	0.45	-0.2	UP	0	0.16	0.23	0.22	0.21	0.33	0.65	0.33	0.65	0	UP	miR-194-5p
41	mmu-miR-425-5p	guide	9.48		0	0.22	0.195	0.145	0.24	0.29	0.53	0.155	0.53	0	UP	miR-425-5p	0	0.09	0.09	0.27	0.3	0.39	0.5	0.17	0.5	0	UP	0	0.35	0.3	0.02	0.18	0.19	0.56	0.14	0.56	0	UP	miR-425-5p
42	mmu-let-7f-5p	guide	19.1		0	0.08	0.49	0.24	0.265	0.475	0.64	0.49	0.64	0	UP	let-7f-5p	0	0.01	0.63	0.32	0.36	0.62	0.86	0.67	0.86	0	UP	0	0.15	0.35	0.16	0.17	0.33	0.42	0.31	0.42	0	UP	let-7f-5p
43	mmu-let-7g-5p	N/A	12.3		0	0.015	0.585	0.135	0.13	0.245	0.4	0.275	0.585	0	UP	let-7g-5p	0	0.01	1.04	0.22	0.04	0.22	0.4	0.3	1.04	0	UP	0	0.02	0.13	0.05	0.22	0.27	0.4	0.25	0.4	0	UP	let-7g-5p
44	mmu-miR-129-5p	N/A	16.1		0	0.255	1.14	1.405	1.53	1.595	1.485	1.47	1.595	0	UP	miR-129-5p	0	0.25	1.21	1.45	1.75	1.81	1.65	1.77	1.81	0	UP	0	0.26	1.07	1.36	1.31	1.38	1.32	1.17	1.38	0	UP	miR-129-5p
45	mmu-miR-146b-5p	N/A	24		0	0.19	0.505	0.82	1.315	1.325	1.32	0.97	1.325	0	UP	miR-146b-5p	0	-0.04	0.22	0.36	0.91	0.43	0.43	0.33	0.91	-0.04	UP	0	0.42	0.79	1.28	1.72	2.22	2.21	1.61	2.22	0	UP	miR-146b-5p
46	mmu-miR-1843a-5p	N/A			0	0.16	0.285	0.255	0.43	0.55	0.44	0.58	0.58	0	UP	miR-1843a-5p	0	0.14	0.42	0.14	0.52	0.77	0.49	0.72	0.77	0	UP	0	0.18	0.15	0.37	0.34	0.33	0.39	0.44	0.44	0	UP	miR-1843a-5p
47	mmu-miR-1983	too low	43.8	SLOW	0	0.06	0.045	0.225	0.275	0.37	0.71	0.445	0.71	0	UP	miR-1983	0	-0.13	-0.22	0.13	0.09	0.26	0.49	0.29	0.49	-0.22	UP	0	0.25	0.31	0.32	0.46	0.48	0.93	0.6	0.93	0	UP	miR-1983
48	mmu-miR-331-3p	N/A			0	0.29	0.255	0.53	0.62	0.545	0.595	0.33	0.62	0	UP	miR-331-3p	0	0.36	0.36	0.6	0.86	0.9	0.92	0.42	0.92	0	UP	0	0.22	0.15	0.46	0.38	0.19	0.27	0.24	0.46	0	UP	miR-331-3p
49	mmu-miR-486a-5p	N/A	26.1		0	0.15	0.25	0.47	0.925	0.89	0.925	0.82	0.925	0	UP	miR-486a-5p	0	0.21	0.28	0.53	0.95	0.88	0.86	0.82	0.95	0	UP	0	0.09	0.22	0.41	0.9	0.9	0.99	0.82	0.99	0	UP	miR-486a-5p
50	mmu-miR-676-3p	N/A	18.7		0	0.085	0.46	0.615	0.335	0.285	0.56	0.3	0.615	0	UP	miR-676-3p	0	0.24	0.6	0.74	0.68	0.64	1.04	0.62	1.04	0	UP	0	-0.07	0.32	0.49	-0.01	-0.07	0.08	-0.02	0.49	-0.07	UP	miR-676-3p
51	mmu-miR-6944-3p	N/A	48	SLOW	0	-0.195	0.255	0.42	0.725	0.95	0.91	0.87	0.95	-0.195	UP	miR-6944-3p	0	-0.4	0.28	0.55	0.76	0.88	0.83	0.79	0.88	-0.4	UP	0	0.01	0.23	0.29	0.69	1.02	0.99	0.95	1.02	0	UP	miR-6944-3p
52	mmu-miR-877-5p	N/A	14		0	-0.105	-0.385	0.41	0.395	0.615	0.855	1.04	1.04	-0.385	UP	miR-877-5p	0	-0.16	-0.51	0.09	0.65	0.68	0.94	0.91	0.94	-0.51	UP	0	-0.05	-0.26	0.73	0.14	0.55	0.77	1.17	1.17	-0.26	UP	miR-877-5p

## Sheet: miRNA synthesis
N	miRNA NAME (miRBase21)	guide?	SERUM REG (final)	Synthesis Info?	Name of the locus	cluster?	class	HOST GENE	Nr loci	0 (RPKM/hr)	15' (RPKM/hr)	30' (RPKM/hr)	45' (RPKM/hr)	60' (RPKM/hr)	90' (RPKM/hr)	120' (RPKM/hr)	240' (RPKM/hr)	360' (RPKM/hr)	480' (RPKM/hr)	0h (CPC/hr)	15' (CPC/hr)	30' (CPC/hr)	45' (CPC/hr)	60' (CPC/hr)	90' (CPC/hr)	120' (CPC/hr)	240' (CPC/hr)	360' (CPC/hr)	480' (CPC/hr)	short name	0h (log2FC/SD)	15' (log2FC/SD)	30' (log2FC/SD)	45' (log2FC/SD)	60' (log2FC/SD)	90' (log2FC/SD)	120' (log2FC/SD)	240' (log2FC/SD)	360' (log2FC/SD)	480' (log2FC/SD)	REG	E	L	EARLY (30-90')	LATE (2-8 hr)	AVE ALL
1	mmu-let-7b-5p	guide	DOWN	YES	LET7B, LET7C2	YES	intergenic		1	24.272	28.144	16.352	12.009	15.38	16.009	13.609	14.162	13.015	13.173	3.298	3.824	2.222	1.632	2.09	2.175	1.849	1.924	1.768	1.79	let-7b-5p	0	0.213491	-0.569733	-1.01495	-0.658088	-0.600576	-0.834846	-0.777483	-0.899473	-0.881632	1. DOWN -EL	D	D	-0.710837	-0.852863	-0.669254
2	mmu-miR-214-3p	guide	DOWN	YES	MIR199A-2, MIR214	YES	antisense		1	125.74	198.978	124.024	82.175	60.36	76.067	80.21	31.665	31.464	31.689	17.084	27.035	16.851	11.165	8.201	10.335	10.898	4.302	4.275	4.306	miR-214-3p	0	0.662183	-0.0198116	-0.613663	-1.05877	-0.725107	-0.648582	-1.98957	-1.99865	-1.98823	1. DOWN -EL	D	D	-0.604339	-1.99215	-0.931133
3	mmu-miR-351-5p	guide	DOWN	YES	MIR322... MIR503	YES	intergenic		1	50.631	34.709	14.559	6.166	6.413	5.466	4.95	7.125	4.208	4.198	6.879	4.716	1.978	0.838	0.871	0.743	0.673	0.968	0.572	0.57	miR-351-5p	0	-0.544635	-1.79816	-3.03718	-2.98145	-3.21076	-3.35352	-2.82912	-3.58811	-3.59317	1. DOWN -EL	D	D	-2.75689	-3.3368	-2.77068
4	mmu-miR-503-5p	guide	DOWN	YES	MIR322...MIR503	YES	intergenic		1	50.631	34.709	14.559	6.166	6.413	5.466	4.95	7.125	4.208	4.198	6.879	4.716	1.978	0.838	0.871	0.743	0.673	0.968	0.572	0.57	miR-503-5p	0	-0.544635	-1.79816	-3.03718	-2.98145	-3.21076	-3.35352	-2.82912	-3.58811	-3.59317	1. DOWN -EL	D	D	-2.75689	-3.3368	-2.77068
5	mmu-miR-335-3p	pass (equlibrium)	DOWN		MEST (MIR335)		intronic	Mest	1	244.812	321.593	124.207	104.891	93.692	64.376	51.77	48.385	44.108	41.527	33.262	43.695	16.876	14.251	12.73	8.747	7.034	6.574	5.993	5.642	miR-335-3p	0	0.393593	-0.978902	-1.22281	-1.38564	-1.92701	-2.24146	-2.33903	-2.47252	-2.5596	1. DOWN -EL	D	D	-1.37859	-2.45705	-1.63704
6	mmu-miR-188-5p	guide	DOWN	YES	MIR500…MIR532	YES	intergenic		1	2.074	2.296	2.928	2.611	1.757	1.944	2.033	2.643	2.591	2.393	0.282	0.312	0.398	0.355	0.239	0.264	0.276	0.359	0.352	0.325	miR-188-5p	0	0.145851	0.497073	0.332124	-0.238685	-0.0951572	-0.0310269	0.348289	0.31988	0.204745	2 -			0.123839	0.290971	0.164788
7	mmu-miR-30b-5p	guide	DOWN	YES	MIR30B, MIR30D	YES	intergenic		1	17.915	16.574	19.616	23.297	23.696	23.342	18.215	13.807	13.903	12.683	2.434	2.252	2.665	3.165	3.22	3.171	2.475	1.876	1.889	1.723	miR-30b-5p	0	-0.112122	0.130806	0.378876	0.403732	0.381609	0.0240994	-0.375669	-0.365706	-0.498406	2 -			0.323756	-0.413261	-0.00364248
8	mmu-miR-30c-5p	guide	DOWN	YES	MIR30A, MIR30C2 // NFYC (MIR30E, MIR30C1)	YES	intergenic; intronic	Nfyc	2	22.411	23.531	28.45	24.086	17.75	16.758	17.258	26.973	29.986	29.214	3.045	3.197	3.865	3.273	2.412	2.277	2.344	3.665	4.074	3.969	miR-30c-5p	0	0.0702765	0.344026	0.104171	-0.336212	-0.419308	-0.37747	0.267371	0.420004	0.382333	2 -			-0.0768307	0.356569	0.0505769
9	mmu-miR-467a-5p	guide	DOWN	YES	SMFTB2 (MIR467A)		intronic	Sfmbt2	1	0.92	0.97	1.503	0.997	0.488	0.7	0.745	0.681	0.889	0.78	0.125	0.132	0.204	0.135	0.066	0.095	0.101	0.093	0.121	0.106	miR-467a-5p	0	0.0786098	0.706641	0.111031	-0.92139	-0.395929	-0.307573	-0.426625	-0.046921	-0.237864	2 -			-0.124912	-0.237137	-0.160002
10	mmu-miR-193a-3p	guide	DOWN	YES	MIR365-2, MIR193A	YES	intergenic		1	17.659	20.973	22.943	36.506	45.014	41.489	35.975	41.205	35.866	31.656	2.399	2.85	3.117	4.96	6.116	5.637	4.888	5.598	4.873	4.301	miR-193a-3p	0	0.248529	0.377725	1.04791	1.35016	1.23249	1.02681	1.22248	1.02238	0.842239	3. UP-EL	U	U	1.00207	1.02903	0.93008
11	mmu-miR-196b-5p	N/A	DOWN		HOXA9 (MIR196B)		intronic	Hoxa9																						miR-196b-5p
12	mmu-miR-324-5p	N/A	DOWN		DVL2 (MIR324)		intronic	Dvl2																						miR-324-5p
13	mmu-miR-92b-3p	N/A	DOWN		MIR92B		intergenic																							miR-92b-3p
14	mmu-let-7i-5p	guide	UP	YES	LET-7I		intergenic		1	27.981	33.702	54.479	56.485	42.963	44.708	45.789	41.619	37.919	37.787	3.802	4.579	7.402	7.675	5.837	6.074	6.221	5.655	5.152	5.134	let-7i-5p	0	0.268274	0.961157	1.01341	0.618469	0.675888	0.710388	0.572768	0.438374	0.433325	3. UP-E	U		0.81723	0.481489	0.63245
15	mmu-miR-125a-5p	guide	UP	YES	LET7E...MIR125A	YES	intergenic		1	39.911	40.576	46.625	64.404	72.514	60.479	58.64	45.203	43.377	41.262	5.423	5.513	6.335	8.751	9.852	8.217	7.967	6.142	5.894	5.606	miR-125a-5p	0	0.0237464	0.224253	0.690357	0.861325	0.599521	0.554945	0.179617	0.120156	0.0478806	3. UP-E	U		0.593864	0.115885	0.366867
16	mmu-miR-99b-5p	guide	UP	YES	LET7E...MIR125A	YES	intergenic		1	39.911	40.576	46.625	64.404	72.514	60.479	58.64	45.203	43.377	41.262	5.423	5.513	6.335	8.751	9.852	8.217	7.967	6.142	5.894	5.606	miR-99b-5p	0	0.0237464	0.224253	0.690357	0.861325	0.599521	0.554945	0.179617	0.120156	0.0478806	3. UP-E	U		0.593864	0.115885	0.366867
17	mmu-miR-143-3p	guide	UP	YES	MIR143, MIR145	YES	intergenic		1	29.033	155.147	251.809	85.659	54.157	47.068	46.104	39.299	29.331	21.156	3.945	21.08	34.213	11.638	7.358	6.395	6.264	5.339	3.985	2.874	miR-143-3p	0	2.41778	3.11645	1.56075	0.899288	0.696919	0.667059	0.436544	0.0145544	-0.456965	3. UP-E	U		1.56835	-0.00195552	1.03915
18	mmu-miR-22-3p	guide	UP	YES	MIR22		intergenic		1	75.603	197.232	221.268	182.061	166.908	145.861	132.255	120.208	95.509	82.556	10.272	26.798	30.064	24.737	22.678	19.818	17.969	16.333	12.977	11.217	miR-22-3p	0	1.38341	1.54932	1.26795	1.14258	0.948094	0.806793	0.669073	0.33724	0.12697	3. UP-E	U		1.22699	0.377761	0.914603
19	mmu-miR-24-3p	guide	UP	YES	AOPEP (MIR24-1…MIR27B)// MIR24-2...MIR27A	YES	intronic	Aopep	2	99.199	139.822	202.405	210.608	253.89	166.835	88.479	92.331	89.222	81.303	13.478	18.997	27.501	28.615	34.495	22.667	12.022	12.545	12.122	11.046	miR-24-3p	0	0.495165	1.02888	1.08617	1.35578	0.749987	-0.16493	-0.103494	-0.152979	-0.287082	3. UP-E	U		1.0552	-0.181185	0.445277
20	mmu-miR-149-5p	guide	UP	YES	GPC1 (MIR149)		intronic	Gpc1	1	1.275	1.702	2.977	9.487	15.36	14.42	15.114	7.683	3.241	2.04	0.173	0.231	0.404	1.289	2.087	1.959	2.054	1.044	0.44	0.277	miR-149-5p	0	0.417121	1.22358	2.89741	3.59259	3.50127	3.56959	2.59328	1.34673	0.679114	3. UP-EL	U	U	2.80371	1.53971	2.2023
21	mmu-miR-155-5p	guide	UP	YES	MIR155		intergenic		1	1.566	1.401	2.424	13.937	35.006	61.01	48.272	8.251	5.673	5.452	0.213	0.19	0.329	1.894	4.756	8.289	6.559	1.121	0.771	0.741	miR-155-5p	0	-0.164854	0.627234	3.15251	4.48082	5.28227	4.94455	2.39586	1.85588	1.79862	3. UP-EL	U	U	3.38571	2.01679	2.7081
22	mmu-miR-17-5p	guide	UP	YES	MIR17...MIR92A1	YES	intergenic		1	18.202	18.181	12.033	22.088	39.782	41.778	34.811	34.498	35.957	45.642	2.473	2.47	1.635	3.001	5.405	5.676	4.73	4.687	4.885	6.201	miR-17-5p	0	-0.0017512	-0.596972	0.279181	1.12803	1.19861	0.935578	0.922403	0.982096	1.32624	3. UP-EL	U	U	0.502214	1.07691	0.685935
23	mmu-miR-19b-3p	guide	UP	YES	MIR17...MIR92A1	YES	intergenic		1	18.202	18.181	12.033	22.088	39.782	41.778	34.811	34.498	35.957	45.642	2.473	2.47	1.635	3.001	5.405	5.676	4.73	4.687	4.885	6.201	miR-19b-3p	0	-0.0017512	-0.596972	0.279181	1.12803	1.19861	0.935578	0.922403	0.982096	1.32624	3. UP-EL	U	U	0.502214	1.07691	0.685935
24	mmu-miR-20a-5p	guide	UP	YES	MIR17...MIR92A1	YES	intergenic		1	18.202	18.181	12.033	22.088	39.782	41.778	34.811	34.498	35.957	45.642	2.473	2.47	1.635	3.001	5.405	5.676	4.73	4.687	4.885	6.201	miR-20a-5p	0	-0.0017512	-0.596972	0.279181	1.12803	1.19861	0.935578	0.922403	0.982096	1.32624	3. UP-EL	U	U	0.502214	1.07691	0.685935
25	mmu-miR-92a-3p	guide	UP	YES	MIR17...MIR92A1	YES	intergenic		1	18.202	18.181	12.033	22.088	39.782	41.778	34.811	34.498	35.957	45.642	2.473	2.47	1.635	3.001	5.405	5.676	4.73	4.687	4.885	6.201	miR-92a-3p	0	-0.0017512	-0.596972	0.279181	1.12803	1.19861	0.935578	0.922403	0.982096	1.32624	3. UP-EL	U	U	0.502214	1.07691	0.685935
26	mmu-miR-21a-5p	guide	UP	YES	VMP1 (MIR21)		intergenic	Vmp1	1	97.168	335.779	321.923	294.753	283.796	323.227	294.023	203.894	160.056	142.673	13.202	45.622	43.74	40.048	38.559	43.917	39.949	27.703	21.747	19.385	miR-21a-5p	0	1.78897	1.7282	1.60097	1.54631	1.73402	1.5974	1.06929	0.72006	0.554184	3. UP-EL	U	U	1.65238	0.781177	1.37105
27	mmu-miR-29a-3p	guide	UP	YES	MIR29A, MIR29B1	YES	intergenic		1	25.831	29.485	20.815	41.801	103.626	177.687	123.409	94.988	68.086	65.967	3.51	4.006	2.828	5.68	14.08	24.142	16.768	12.906	9.251	8.963	miR-29a-3p	0	0.190691	-0.311689	0.69442	2.0041	2.782	2.25617	1.8785	1.39814	1.35251	3. UP-EL	U	U	1.29221	1.54305	1.36054
28	mmu-miR-29b-3p	guide	UP	YES	MIR29B2, MIR29C	YES	intergenic		2	28.482	32.569	23.86	43.296	104.999	180.308	125.552	97.811	70.377	67.554	3.87	4.425	3.242	5.883	14.266	24.498	17.059	13.29	9.562	9.179	miR-29b-3p	0	0.193344	-0.255449	0.604218	1.88218	2.66226	2.14013	1.77994	1.30498	1.246	3. UP-EL	U	U	1.2233	1.44364	1.28418
29	mmu-miR-31-5p	guide	UP	YES	MIR31		intergenic		1	81.442	71.089	51.161	124.676	178.099	180.845	155.176	143.17	121.593	117.949	11.065	9.659	6.951	16.94	24.198	24.571	21.084	19.452	16.521	16.026	miR-31-5p	0	-0.196058	-0.670711	0.61443	1.12888	1.15095	0.930145	0.813915	0.578298	0.534411	3. UP-EL	U	U	0.555889	0.642208	0.542696
30	mmu-miR-365-3p	guide	UP	YES	MIR365-1, MIR193B // MIR365-2, MIR193A	YES	intergenic		2	19.693	22.813	23.728	38.689	48.865	45.28	38.988	42.934	36.669	32.089	2.675	3.1	3.224	5.257	6.639	6.152	5.297	5.833	4.982	4.36	miR-365-3p	0	0.212729	0.269313	0.974701	1.31143	1.20152	0.985637	1.1247	0.897186	0.704789	3. UP-EL	U	U	0.939239	0.908892	0.853555
31	mmu-miR-125b-5p	guide	UP	YES	MIR125B1 // MIR125B2	YES	intergenic		2	168.425	139.221	156.442	264.789	245.819	255.163	249.061	257.622	261.313	288.369	22.884	18.916	21.255	35.976	33.4	34.669	33.84	35.003	35.504	39.18	miR-125b-5p	0	-0.274732	-0.106537	0.652696	0.545509	0.599307	0.56439	0.613139	0.633642	0.775778	3. UP-L		U	0.422744	0.674187	0.444799
32	mmu-miR-221-3p	guide	UP	YES	MIR221, MIR222	YES	intergenic		1	27.403	23.705	24.382	36.771	37.985	36.678	53.331	41.344	40.387	39.783	3.723	3.221	3.313	4.996	5.161	4.983	7.246	5.617	5.487	5.405	miR-221-3p	0	-0.208957	-0.168327	0.424308	0.471185	0.420549	0.960719	0.593334	0.559552	0.537829	3. UP-L		U	0.286929	0.563572	0.39891
33	mmu-miR-222-3p	guide	UP	YES	MIR221, MIR222	YES	intergenic		1	27.403	23.705	24.382	36.771	37.985	36.678	53.331	41.344	40.387	39.783	3.723	3.221	3.313	4.996	5.161	4.983	7.246	5.617	5.487	5.405	miR-222-3p	0	-0.208957	-0.168327	0.424308	0.471185	0.420549	0.960719	0.593334	0.559552	0.537829	3. UP-L		U	0.286929	0.563572	0.39891
34	mmu-miR-30a-5p	guide	UP	YES	MIR30A, MIR30C2	YES	intergenic		1	12.133	12.854	14.757	12.584	8.492	8.098	8.084	18.467	22.721	22.044	1.648	1.746	2.005	1.71	1.154	1.1	1.098	2.509	3.087	2.995	miR-30a-5p	0	0.0833373	0.282886	0.0532801	-0.514073	-0.583213	-0.585838	0.606396	0.905489	0.86184	3. UP-L		U	-0.19028	0.791242	0.123345
35	mmu-miR-100-5p	guide	UP	YES	LET7A-2, MIR100	YES	intergenic		1	8.328	8.741	8.272	5.957	7.368	6.974	7.242	7.363	6.457	5.881	1.132	1.188	1.124	0.809	1.001	0.947	0.984	1	0.877	0.799	miR-100-5p	0	0.0696609	-0.0102319	-0.484662	-0.177432	-0.257438	-0.202144	-0.178874	-0.368225	-0.502607	2 -			-0.232441	-0.349902	-0.234661
36	mmu-miR-151-3p	guide	UP	YES	PTK2 (MIR151)		intronic	Ptk2	1	14.069	14.12	14.748	13.944	11.143	13.937	21.481	17.675	15.11	14.635	1.912	1.919	2.004	1.895	1.514	1.894	2.919	2.402	2.053	1.989	miR-151-3p	0	0.00527219	0.0678	-0.0128847	-0.336717	-0.0136462	0.610392	0.329154	0.102651	0.0569608	2 -			-0.0738621	0.162922	0.0898868
37	mmu-miR-296-5p	guide	UP	YES	MIR296, MIR298	YES	intergenic		1	6.859	7.465	2.871	4.393	7.536	7.552	7.538	6.617	5.814	5.402	0.932	1.014	0.39	0.597	1.024	1.026	1.024	0.899	0.79	0.734	miR-296-5p	0	0.121656	-1.25686	-0.642599	0.135814	0.138629	0.135814	-0.0520088	-0.238477	-0.34455	2 -			-0.406253	-0.211679	-0.222509
38	mmu-miR-501-3p	guide	UP	YES	MIR500…MIR532	YES	intergenic		1	2.074	2.296	2.928	2.611	1.757	1.944	2.033	2.643	2.591	2.393	0.282	0.312	0.398	0.355	0.239	0.264	0.276	0.359	0.352	0.325	miR-501-3p	0	0.145851	0.497073	0.332124	-0.238685	-0.0951572	-0.0310269	0.348289	0.31988	0.204745	2 -			0.123839	0.290971	0.164788
39	mmu-miR-423-5p	guide	UP	YES	CCDC55 (MIR423)		intronic	CCdc55	1	12.945	10.745	10.895	11.005	9.402	9.731	8.169	8.285	7.729	10.142	1.759	1.46	1.48	1.495	1.277	1.322	1.11	1.126	1.05	1.378	miR-423-5p	0	-0.268787	-0.249158	-0.23461	-0.461997	-0.412033	-0.664196	-0.643549	-0.744366	-0.35218	1. DOWN-L		D	-0.33945	-0.580031	-0.447875
40	mmu-miR-194-5p	guide	UP	YES	MIR192, MIR194	YES	intergenic		1	0.919	1.343	1.436	0.398	0.422	0.395	0.302	0.425	0.478	0.37	0.125	0.182	0.195	0.054	0.057	0.054	0.041	0.058	0.065	0.05	miR-194-5p	0	0.54201	0.641546	-1.2109	-1.13289	-1.2109	-1.60823	-1.1078	-0.943416	-1.32193	1. DOWN -EL	D	D	-0.728285	-1.12438	-0.816946
41	mmu-miR-425-5p	guide	UP	YES	MIR191, MIR425	YES	intergenic		1	3.59	4.024	3.676	1.717	1.737	1.276	1.656	2.523	2.211	3.017	0.488	0.547	0.499	0.233	0.236	0.173	0.225	0.343	0.3	0.41	miR-425-5p	0	0.16466	0.0321587	-1.06655	-1.04809	-1.49611	-1.11696	-0.508673	-0.701919	-0.251257	1. DOWN-E	D		-0.894649	-0.487283	-0.66586
42	mmu-let-7f-5p	guide	UP	YES	LET7A-1... LET7F-1	YES	intergenic		1	97.968	124.349	142.233	100.693	87.362	74.499	74.509	73.756	70.02	65.041	13.311	16.895	19.325	13.681	11.87	10.122	10.123	10.021	9.514	8.837	let-7f-5p	0	0.343977	0.537849	0.0395547	-0.165299	-0.395125	-0.394982	-0.409592	-0.484495	-0.59099	1. DOWN-L		D	0.00424514	-0.495026	-0.168789
43	mmu-let-7g-5p	N/A	UP		WDR82 (LET7G)		intronic	Wdr82																						let-7g-5p
44	mmu-miR-129-5p	N/A	UP		MIR129-1 // MIR129-2		intergenic																							miR-129-5p
45	mmu-miR-146b-5p	N/A	UP		TMEM180 (MIR146B)		intronic	Tmem180																						miR-146b-5p
46	mmu-miR-1843a-5p	N/A	UP		SCARNA3B (MIR1843A)		intronic	Scarna3b																						miR-1843a-5p
47	mmu-miR-1983	too low	UP		MIR1983		intergenic																							miR-1983
48	mmu-miR-331-3p	N/A	UP		VEZT (MIR331)		intronic	Vezt																						miR-331-3p
49	mmu-miR-486a-5p	N/A	UP		ANK1 (MIR486A)		intronic	Ank1																						miR-486a-5p
50	mmu-miR-676-3p	N/A	UP		EDA (MIR676)		intronic	Eda																						miR-676-3p
51	mmu-miR-6944-3p	N/A	UP		DBN1 (MIR6944)		intronic	Dbn1																						miR-6944-3p
52	mmu-miR-877-5p	N/A	UP		ABCF1 (MIR877)		intronic	Abcf1																						miR-877-5p

## Sheet: tail_trim
ORDER	miRNA NAME (miRBase21)	guide?	SERUM REG	NT/T 0hrs	NT/T 1hrs	NT/T 2hrs	NT/T 4hrs	NT/T 6hrs	NT/T 8hrs	NT/T 10hrs	NT/T 12hrs	TAIL?	TAILING	trim/T 0hrs	trim/T 1hrs	trim/T 2hrs	trim/T 4hrs	trim/T 6hrs	trim/T 8hrs	trim/T 10hrs	trim/T 12hrs	DELTA TAIL	TRIM?		short name	NT/T 0hrs of MJM	NT/T 1hrs of MJM	NT/T 2hrs of MJM	NT/T 4hrs of MJM	NT/T 6hrs of MJM	NT/T 8hrs of MJM	NT/T 10hrs of MJM	NT/T 12hrs of MJM	NT(T GW-TOT	NT/T GW-unt	trim/T 0hrs of MJM	trim/T 1hrs of MJM	trim/T 2hrs of MJM	trim/T 4hrs of MJM	trim/T 6hrs of MJM	trim/T 8hrs of MJM	trim/T 10hrs of MJM	trim/T 12hrs of MJM	trim/T GW-TOT	trim/T GW-unt	NT/T 0hrs of FG	NT/T 1hrs of FG	NT/T 2hrs of FG	NT/T 4hrs of FG
1	mmu-let-7b-5p	guide	DOWN	0	-0.04	0.11	0.31	0.405	0.595	0.595	0.875	YES	TAIL-UP	0	-0.01	-0.02	0.33	0.525	0.69	0.795	1.095	1.115	YES	TRIM-UP	mmu-let-7b-5p	0	0.01	0.14	0.37	0.5	0.66	0.66	0.95	0.78	0.57	0	0.17	0.15	0.35	0.58	0.72	0.92	1.19	0.54	0.39	0	-0.09	0.08	0.25
2	mmu-miR-214-3p	guide	DOWN	0	-0.06	-0.09	0.26	0.215	0.39	0.39	0.36	YES	TAIL-UP	0	-0.245	0.405	0.575	0.68	0.86	1.4	1.33	1.645	YES	TRIM-UP	mmu-miR-214-3p	0	0.05	0.01	0.31	0.28	0.42	0.42	0.44	-0.17	-0.55	0	-0.18	0.45	0.61	0.74	0.97	1.41	1.15	-0.26	-0.63	0	-0.17	-0.19	0.21
3	mmu-miR-351-5p	guide	DOWN	0	-0.075	0.24	0.35	0.055	0.065	0.065	-0.055	-		0	-0.09	0.3	0.725	0.665	0.73	1.08	0.83	1.17	YES	TRIM-UP	mmu-miR-351-5p	0	-0.08	0.3	0.45	-0.04	-0.04	-0.04	-0.18	0.14	-0.08	0	-0.08	0.36	0.74	0.58	0.61	1.16	0.65	-0.66	-1.98	0	-0.07	0.18	0.25
4	mmu-miR-503-5p	guide	DOWN	0	0.465	0.965	0.92	5.31	1.095	1.095	2.15	YES	TAIL-UP	0	1.085	0.43	0.995	1.595	1.735	0.13	1.61	1.735	YES	TRIM-UP	mmu-miR-503-5p	0	0.94	2.97	2.56	5.31	2.77	2.77	3.72	3.98	4.91	0	1.01	0.72	0.87	2.24	2.05	-0.57	2.22	1.5	2.34	0	-0.01	-1.04	-0.72
5	mmu-miR-335-3p	pass (equlibrium)	DOWN	0	-0.055	0.09	0.38	0.685	0.76	0.76	0.8	YES	TAIL-UP	0	-0.06	0.21	0.54	1.335	1.855	1.89	2.455	2.515	YES	TRIM-UP	mmu-miR-335-3p	0	0.18	0.14	0.53	0.94	0.88	0.88	0.94	1.1	0.36	0	0.01	0.35	0.69	1.43	2.07	1.95	2.85	2.48	1.78	0	-0.29	0.04	0.23
6	mmu-miR-188-5p	guide	DOWN	0	0.19	0.03	0.645	0.32	0.1	0.1	0.2	YES	TAIL-UP	0	0.56	n.d.	0.45	1.09	1.47	1.34	n.d.	n.d.	-	-	mmu-miR-188-5p	0	0.3	-0.29	0.89	0.4	0.49	0.49	0.02	-0.3	0.05	0	1.77			1.62		1.34		1.75	2.69	0	0.08	0.35	0.4
7	mmu-miR-30b-5p	guide	DOWN	0	0.085	0.985	1.93	2.205	2.34	2.34	2.11	YES	TAIL-UP	0	-0.295	0.275	n.d.	n.d.	n.d.	n.d.	n.d.	n.d.	-	-	mmu-miR-30b-5p	0	0.36	1.16	2.24	2.53	2.61	2.61	2.26	1.28	0.87	0	0	-0.22						-1.55	-1.58	0	-0.19	0.81	1.62
8	mmu-miR-30c-5p	guide	DOWN	0	-0.005	0.755	0.95	1.055	0.81	0.81	0.39	YES	TAIL-UP	0	0.725	0.115	-0.49	-0.86	-0.89	-1.375	-1.33	2.1	YES	TRIM-DOWN	mmu-miR-30c-5p	0	0.12	0.88	0.88	1	0.7	0.7	0.23	-0.63	-0.6	0	1	0.31	-0.16	-0.8	-1.26	-1.45	-0.94	-6	-5	0	-0.13	0.63	1.02
9	mmu-miR-467a-5p	guide	DOWN	0	0.22	-0.395	-1.275	0.335	-0.645	-0.645	-0.385	YES	TAIL-DOWN	0	-0.005	0.395	0.395	0.525	0.785	0.695	0.9	0.905	YES	TRIM-UP	mmu-miR-467a-5p	0		-0.46	-0.31	0.11	-1.88	-1.88	-0.19	-1.12	-0.55	0	-0.17	0.47	0.54	0.47	0.71	0.72	0.91	-0.73	-1.06	0	0.22	-0.33	-2.24
10	mmu-miR-193a-3p	guide	DOWN	0	-0.335	-0.69	-1.36	-2.295	-1.535	-1.535	-2.425	YES	TAIL-DOWN	0	-0.035	-0.075	0.235	-0.275	-0.775	0.2	-0.175	1.01	YES	TRIM-DOWN	mmu-miR-193a-3p	0	-0.5	-0.72	-1.03	-2.35	-1.97	-1.97	-2.82	-6.13	-3.75	0	-0.18	-0.74	0.33	0.04	-0.79	-0.15	-0.79	-2.68	-2.23	0	-0.17	-0.66	-1.69
11	mmu-miR-196b-5p	N/A	DOWN	0	0.04	0.235	0.255	0.215	0.37	0.37	0.38	YES	TAIL-UP	0	-0.205	-0.14	-0.435	-0.675	-0.455	-0.27	-0.03	0.675	YES	TRIM-DOWN	mmu-miR-196b-5p	0	0.02	0.28	0.19	0.15	0.38	0.38	0.25	-0.38	-0.82	0	0.14	-0.1	-0.28	-0.25	-0.18	-0.29	-0.19	-0.5	-0.49	0	0.06	0.19	0.32
12	mmu-miR-324-5p	N/A	DOWN	0	-0.8	0.065	0.44	0.225	-0.075	-0.075	0.41	YES	TAIL-UP	0	0.13	0.45	0.865	0.65	0.89	1.275	1.105	1.275	YES	TRIM-UP	mmu-miR-324-5p	0	0.01	0.08	0.69	0.58	0.24	0.24	0.57	0.38	-0.11	0	0.38	0.56	1.17	1.18	1.03	0.95	1.3	0.96	1.71	0	-1.61	0.05	0.19
13	mmu-miR-92b-3p	N/A	DOWN	0	-0.13	0.15	0.515	0.615	1.065	1.065	1.29	YES	TAIL-UP	0	-0.02	-0.13	0.695	1.03	1.495	1.635	1.925	2.055	YES	TRIM-UP	mmu-miR-92b-3p	0	-0.21	0.2	0.48	0.72	1.23	1.23	1.3	1.63	0.62	0	-0.1	-0.21	0.55	1.23	1.51	1.59	1.91	1.81	0.32	0	-0.05	0.1	0.55
14	mmu-let-7i-5p	guide	UP	0	-0.005	0.06	-0.005	0.025	-0.01	-0.01	-0.01	-		0	-0.055	-0.025	-0.04	-0.07	-0.105	-0.055	-0.09	0.105	-	-	mmu-let-7i-5p	0	0.04	0.13	0.05	0.06	0.02	0.02	0.04	-0.37	-0.13	0	-0.13	-0.21	-0.08	-0.22	-0.33	-0.14	-0.23	-0.81	-0.76	0	-0.05	-0.01	-0.06
15	mmu-miR-125a-5p	guide	UP	0	0.135	0.16	0.3	0.425	0.395	0.395	0.47	YES	TAIL-UP	0	0.11	0.08	0.04	0.015	-0.095	-0.115	-0.24	0.35	-	-	mmu-miR-125a-5p	0	0.11	0.16	0.34	0.44	0.33	0.33	0.4	-0.59	-0.59	0	0	0	0	-0.12	-0.3	-0.1	-0.39	-4.68	-5.27	0	0.16	0.16	0.26
16	mmu-miR-99b-5p	guide	UP	0	-0.045	-0.035	-0.035	0.01	0.015	0.015	0.015	-		0	-0.055	-0.035	-0.05	0.01	0.095	0.06	0.18	0.235	-	-	mmu-miR-99b-5p	0	0	0.02	0.01	0.08	0.07	0.07	0.07	0.26	0.42	0	-0.06	-0.01	-0.04	0.07	0.11	0.09	0.24	-0.33	-0.4	0	-0.09	-0.09	-0.08
17	mmu-miR-143-3p	guide	UP	0	-0.01	0.005	-0.055	0.025	-0.005	-0.005	-0.07	-		0	-0.15	-0.095	-0.1	-0.105	-0.095	0.205	0.115	0.355	-	-	mmu-miR-143-3p	0	0	-0.03	-0.12	0	-0.08	-0.08	-0.14	-0.3	-0.13	0	0	0.13	0.13	-0.06	-0.13	0.34	0.01	-0.58	-0.14	0	-0.02	0.04	0.01
18	mmu-miR-22-3p	guide	UP	0	0	0.015	-0.015	0.08	0.13	0.13	0.22	-		0	-0.005	0.095	0.045	-0.02	-0.075	0.06	-0.115	0.21	-	-	mmu-miR-22-3p	0	0.03	0.03	-0.03	0.13	0.15	0.15	0.25	0.11	0.44	0	-0.08	0.04	0.05	-0.08	-0.2	0.08	-0.25	-1.38	-1.24	0	-0.03	0	0
19	mmu-miR-24-3p	guide	UP	0	-0.01	-0.25	-0.38	-0.32	-0.375	-0.375	-0.355	YES	TAIL-DOWN	0	0.08	0.18	0.14	0.04	-0.035	-0.095	-0.065	0.275	-	-	mmu-miR-24-3p	0	0.02	-0.33	-0.47	-0.49	-0.62	-0.62	-0.53	-0.76	-0.54	0	0.07	0.41	0.27	-0.16	-0.32	-0.37	-0.37	0.85	0.58	0	-0.04	-0.17	-0.29
20	mmu-miR-149-5p	guide	UP	0	-0.48	-1.625	-2.665	-2.37	-1.74	-1.74	-1.12	YES	TAIL-DOWN	0	-0.145	-1.615	-2.64	-2.81	-2.315	-1.655	-1.43	2.81	YES	TRIM-DOWN	mmu-miR-149-5p	0	-0.41	-1.86	-2.63	-2.56	-1.96	-1.96	-1.31	-0.35	0.21	0	-0.23	-1.84	-2.85	-3.04	-2.73	-2.06	-2.04	-2.27	-0.56	0	-0.55	-1.39	-2.7
21	mmu-miR-155-5p	guide	UP	0	-0.06	-1.16	-0.645	0.05	0.375	0.375	0.585	YES	TAIL-UP	0	0.065	-1.805	-3.09	-2.9	-2.13	-2.46	-1.82	3.155	YES	TRIM-DOWN	mmu-miR-155-5p	0	0.2	-0.67	-0.47	0.25	0.6	0.6	0.81	1.2	1.48	0	0.23	-1.91	-3.14	-3.11	-2.05	-2.47	-1.81	-1.36	-0.12	0	-0.32	-1.65	-0.82
22	mmu-miR-17-5p	guide	UP	0	0.335	0.065	0.09	-0.04	-0.095	-0.095	0.165	-		0	-0.06	-0.11	-0.365	-0.71	-0.745	-1.135	-1.165	1.165	YES	TRIM-DOWN	mmu-miR-17-5p	0	0.11	-0.48	-0.28	-0.27	-0.24	-0.24	-0.05	-0.33	0.2	0	-0.3	-0.19	-0.45	-0.9	-0.74	-1.12	-0.9	-2.11	-2.35	0	0.56	0.61	0.46
23	mmu-miR-19b-3p	guide	UP	0	-0.085	-0.07	-1.765	-0.42	-0.395	-0.395	-0.255	YES	TAIL-DOWN	0	0.295	0.17	0.12	0.13	-0.075	-0.365	-0.6	0.895	YES	TRIM-DOWN	mmu-miR-19b-3p	0	0.47		-1.75	0.02	-0.05	-0.05	-0.4	-1.07	-0.74	0	-0.01	0	0.19	0.2	-0.27	-0.23	-0.52	-0.69	-0.89	0	-0.64	-0.07	-1.78
24	mmu-miR-20a-5p	guide	UP	0	0.48	0.08	0.11	0.08	-0.43	-0.43	0.035	YES	TAIL-DOWN	0	0.06	-0.705	-0.545	-0.73	-0.68	-0.985	-1.125	1.185	YES	TRIM-DOWN	mmu-miR-20a-5p	0	0.32	0.28	0.25	0.27	-0.36	-0.36	0.15	0.27	0.78	0	-0.52	-1.07	-1.15	-1.06	-0.92	-1.56	-1.5	-1.55	-1.98	0	0.64	-0.12	-0.03
25	mmu-miR-92a-3p	guide	UP	0	0.015	0.135	0	0	0.065	0.065	-0.03	-		0	-0.035	0.24	0.085	0	0.385	0.215	0.335	0.42	-	-	mmu-miR-92a-3p	0	-0.1	0.09	0	-0.06	0.02	0.02	0.02	-0.11	0.25	0	-0.06	0.29	0	-0.03	0.38	0.34	0.39	0.81	0.82	0	0.13	0.18	0
26	mmu-miR-21a-5p	guide	UP	0	0.085	0.44	1.055	1.305	1.285	1.285	1.385	YES	TAIL-UP	0	-0.065	-0.18	-0.495	-0.525	-0.455	-0.755	-0.625	0.755	YES	TRIM-DOWN	mmu-miR-21a-5p	0	0.1	0.45	1.12	1.53	1.41	1.41	1.52	1.7	2.12	0	-0.03	-0.09	-0.56	-0.7	-0.49	-0.79	-0.57	-1.47	-1.62	0	0.07	0.43	0.99
27	mmu-miR-29a-3p	guide	UP	0	0.01	-0.05	-0.215	-0.295	-0.25	-0.25	-0.195	-		0	0.055	-0.055	-0.345	-0.44	-0.57	-0.73	-0.65	0.785	YES	TRIM-DOWN	mmu-miR-29a-3p	0	0.02	-0.04	-0.15	-0.14	-0.17	-0.17	-0.11	-0.48	0.08	0	0.07	0.03	-0.29	-0.34	-0.5	-0.61	-0.56	-1.36	-0.9	0	0	-0.06	-0.28
28	mmu-miR-29b-3p	guide	UP	0	0.52	0.27	0.28	1.86	0.28	0.28	0.94	YES	TAIL-UP	0	-0.655	-0.32	-0.505	-0.525	-0.985	-1	-1.07	1.07	YES	TRIM-DOWN	mmu-miR-29b-3p	0	0.52	0.27	0.28	1.86	0.28	0.28	0.94	0.75	1.48	0	-0.18	0.19	-0.1	0.24	-0.55	-0.6	-0.8	-2.49	-2.22
29	mmu-miR-31-5p	guide	UP	0	-0.035	-0.155	0.015	0.02	-0.025	-0.025	-0.03	-		0	-0.035	-0.09	0.06	-0.16	-0.13	-0.16	-0.255	0.315	-	-	mmu-miR-31-5p	0	-0.05	-0.33	0.09	-0.02	-0.15	-0.15	-0.13	-0.16	0.16	0	0	-0.23	0.08	-0.27	-0.21	-0.2	-0.33	-0.18	0.16	0	-0.02	0.02	-0.06
30	mmu-miR-365-3p	guide	UP	0	-0.11	0.165	-0.03	0.08	0.04	0.04	0.025	-		0	-0.235	-0.485	-0.355	-0.405	-0.27	-0.605	-0.11	0.605	YES	TRIM-DOWN	mmu-miR-365-3p	0	0	0.38	0.06	0.11	0.03	0.03	0.11	0.15	0.66	0	0	-0.33	-0.2	-0.53	0.28	-0.88	-0.06	-2.3	-3.1	0	-0.22	-0.05	-0.12
31	mmu-miR-125b-5p	guide	UP	0	0.075	0.095	0.15	0.2	0.185	0.185	0.165	-		0	0.07	0.1	0.11	-0.02	-0.195	-0.25	-0.45	0.56	-	-	mmu-miR-125b-5p	0	0.04	0.15	0.16	0.25	0.18	0.18	0.09	-2.6	-2.21	0	-0.04	0.05	0.06	-0.15	-0.31	-0.17	-0.58	-5.42	-5.67	0	0.11	0.04	0.14
32	mmu-miR-221-3p	guide	UP	0	-0.17	-0.275	-0.125	-0.16	-0.18	-0.18	-0.14	-		0	-0.125	-0.195	-0.245	-0.365	-0.495	-0.605	-0.565	0.605	YES	TRIM-DOWN	mmu-miR-221-3p	0	-0.35	-0.56	-0.2	-0.23	-0.29	-0.29	-0.35	0.9	0.64	0	-0.28	-0.43	-0.31	-0.33	-0.53	-0.67	-0.67	-0.42	-0.08	0	0.01	0.01	-0.05
33	mmu-miR-222-3p	guide	UP	0	0.13	-0.22	-0.375	-0.625	-0.925	-0.925	-1.145	YES	TAIL-DOWN	0	0.8	0.15	-1.11	-0.62	-1.04	-0.67	-1.835	2.635	YES	TRIM-DOWN	mmu-miR-222-3p	0	0.23	-0.28	-0.31	-0.52	-0.92	-0.92	-1.32	-1.65	-1.46	0	1.6	0.31	-1.02	-0.03	-0.45	0.29	-2.04	-2.06	-1.06	0	0.03	-0.16	-0.44
34	mmu-miR-30a-5p	guide	UP	0	-0.05	0.03	0.07	0.09	0.095	0.095	0.05	-		0	-0.16	-0.1	-0.115	-0.26	-0.305	-0.455	-0.5	0.5	YES	TRIM-DOWN	mmu-miR-30a-5p	0	-0.08	0.01	0.08	0.08	0.13	0.13	0.09	-0.71	-0.71	0	-0.3	-0.18	-0.22	-0.65	-0.48	-0.59	-0.55	-2.18	-2.83	0	-0.02	0.05	0.06
35	mmu-miR-100-5p	guide	UP	0	0.02	-0.02	0.025	0.065	-0.015	-0.015	0.035	-		0	-0.095	-0.08	-0.1	-0.125	-0.005	-0.165	0.09	0.255	-	-	mmu-miR-100-5p	0	0.08	0.02	0.05	0.09	0.02	0.02	0.03	-0.82	-0.93	0	-0.04	-0.05	-0.11	-0.04	0.1	-0.11	0.22	0.95	0.98	0	-0.04	-0.06	0
36	mmu-miR-151-3p	guide	UP	0	-0.005	0.05	0.02	-0.01	0.03	0.03	0.045	-		0	0.005	0.095	-0.02	-0.08	-0.05	-0.005	-0.045	0.175	-	-	mmu-miR-151-3p	0	0.02	0.08	0.05	0.05	0.08	0.08	0.1	-0.25	-0.23	0	-0.05	0.04	-0.03	-0.14	-0.09	-0.02	-0.02	-0.34	-0.55	0	-0.03	0.02	-0.01
37	mmu-miR-296-5p	guide	UP	0	-0.22	-0.12	-0.25	-0.205	0.02	0.02	0.315	YES	TAIL-DOWN	0	-1.03	-0.72	-0.76	-0.44	-1.33	-1.66	0.11	1.77	YES	TRIM-DOWN	mmu-miR-296-5p	0	0.02	0.23	-0.34	-0.1	0.34	0.34	0.41	-0.66	-0.37	0	-1.39	0.01	-1.49	-0.66	-1.15	-1.93	-0.47	-2.63	-0.71	0	-0.46	-0.47	-0.16
38	mmu-miR-501-3p	guide	UP	0	-0.005	-0.04	-0.09	-0.01	0.015	0.015	0.17	-		0	0.1	-0.11	0.185	0.03	-0.15	0.06	0.155	0.335	-	-	mmu-miR-501-3p	0	-0.04	-0.09	-0.16	-0.08	0	0	0.14	-1.22	-0.77	0	0.13	-0.11	0.18	0	-0.19	0.14	0.27	-2.35		0	0.03	0.01	-0.02
39	mmu-miR-423-5p	guide	UP	0	-0.125	-0.01	0.01	0.12	0.14	0.14	0.26	-		0	-0.025	0.1	-0.035	0.015	-0.02	0.12	0.04	0.155	-	-	mmu-miR-423-5p	0	0.04	0.08	0.16	0.19	0.15	0.15	0.23	0.36	0.68	0	0.05	0.13	-0.05	0.08	0.04	0.14	0.06	-0.58	-0.32	0	-0.29	-0.1	-0.14
40	mmu-miR-194-5p	guide	UP	0	0.33	0.71	0.815	0.57	0.94	0.94	0.38	YES	TAIL-UP	0	-0.88	-0.935	0.25	-0.135	-0.41	-0.44	-0.055	1.185	YES	TRIM-DOWN	mmu-miR-194-5p	0	-0.44	0.51	0.27	0.11	1.1	1.1	0.24	-0.12	0.44	0	0.38	0.25	-0.73	-1.12	1.06	0.2	0.27	-3	-0.47	0	1.1	0.91	1.36
41	mmu-miR-425-5p	guide	UP	0	-0.52	0.03	-0.01	-0.03	0.345	0.345	0.34	YES	TAIL-UP	0	-0.245	-0.135	0.005	-0.195	-0.33	-0.63	0.13	0.76	YES	TRIM-DOWN	mmu-miR-425-5p	0	-0.34	0.31	-0.08	0.3	0.34	0.34	0.57	-0.22	-0.78	0	-0.47	0.02	-0.42	-0.54	-0.53	-0.89	-0.12	-2.6	-4.58	0	-0.7	-0.25	0.06
42	mmu-let-7f-5p	guide	UP	0	0.095	0.11	0.21	0.255	0.35	0.35	0.5	YES	TAIL-UP	0	0.05	-0.02	-0.005	-0.1	-0.17	-0.315	-0.15	0.365	-	-	mmu-let-7f-5p	0	0.12	0.09	0.26	0.3	0.32	0.32	0.38	-0.19	-0.19	0	0.18	0.17	0	-0.11	-0.21	-0.31	-0.2	-0.91	-1.22	0	0.07	0.13	0.16
43	mmu-let-7g-5p	N/A	UP	0	0.065	0.1	0.14	0.23	0.36	0.36	0.485	YES	TAIL-UP	0	0.045	-0.08	0.07	0.035	0.06	-0.17	-0.06	0.24	-	-	mmu-let-7g-5p	0	0.01	-0.01	0.2	0.33	0.33	0.33	0.47	0.74	0.89	0	-0.08	-0.34	-0.08	-0.1	0.07	-0.18	-0.08	-1.3	-1.19	0	0.12	0.21	0.08
44	mmu-miR-129-5p	N/A	UP	0	-0.125	-0.65	-0.67	-0.42	-0.11	-0.11	0.145	YES	TAIL-DOWN	0	0.885	0.72	0.285	0.43	0.74	0.525	0.99	0.99	YES	TRIM-UP	mmu-miR-129-5p	0	-0.12	-0.6	-0.66	-0.37	-0.15	-0.15	-0.02	0.25	0.37	0	-0.72	-0.39	-0.33	-1.2	-0.7	-0.45	0.24	0.54	0.47	0	-0.13	-0.7	-0.68
45	mmu-miR-146b-5p	N/A	UP	0	-0.225	-0.145	-0.09	-0.33	-0.265	-0.265	-0.235	YES	TAIL-DOWN	0	-0.4	-0.12	-0.78	-0.86	-0.855	-0.53	-0.685	0.86	YES	TRIM-DOWN	mmu-miR-146b-5p	0	-0.1	0.08	0.19	-0.15	0.01	0.01	-0.11	0.37	0.47	0	0.37	-0.19	-0.68	-1.02	-0.27	0.11	0.16	-0.49	1.63	0	-0.35	-0.37	-0.37
46	mmu-miR-1843a-5p	N/A	UP	0	-0.845	-0.565	-0.715	-0.43	-0.845	-0.845	-0.29	YES	TAIL-DOWN	0	0.165	0.9	0.295	0.67	1.115	0.79	0.995	1.115	YES	TRIM-UP	mmu-miR-1843a-5p	0	-0.74	-0.24	-1.19	-0.39	-0.92	-0.92	-0.3	-0.97	-0.82	0	-1.45	0.25	-0.61	0.48	1.15	0.45	-0.22	-0.71	-0.57	0	-0.95	-0.89	-0.24
47	mmu-miR-1983	too low	UP	0	-0.09	-0.025	0.39	0.66	0.39	0.39	0.66	YES	TAIL-UP	0	-2.085	-0.935	-0.665	-0.47	-1.735	-1.805	0.61	2.695	YES	TRIM-DOWN	mmu-miR-1983	0	0.3	0.51	0.48	0.92	0.52	0.52	1.16	0.74	0.73	0	-1.59	-0.96	-1.48	-0.73	-3.1	-0.87		-2.71	-0.7	0	-0.48	-0.56	0.3
48	mmu-miR-331-3p	N/A	UP	0	-0.025	-0.03	0.025	0.03	-0.19	-0.19	0.095	-		0	-1.485	-1.03	0.06	0.67	-0.95	-1.565	-0.975	2.235	YES	TRIM-DOWN	mmu-miR-331-3p	0	-0.03	-0.12	-0.12	-0.1	-0.29	-0.29	-0.02	-0.31	-0.38	0	-2.08	-1.04	0.59	0.67	-0.73	-1.34	-0.06		-0.85	0	-0.02	0.06	0.17
49	mmu-miR-486a-5p	N/A	UP	0	-0.05	0.01	-0.12	-0.325	-0.235	-0.235	-0.225	-		0	-0.115	0.36	0.305	1.31	0.095	-0.77	-0.27	2.08	YES	TRIM-UP	mmu-miR-486a-5p	0	-0.13	0.04	-0.15	-0.19	-0.15	-0.15	-0.22	-0.81	-0.14	0	-0.14	0.36	-0.57		-0.34	-1.1	-0.1	-0.61	0.42	0	0.03	-0.02	-0.09
50	mmu-miR-676-3p	N/A	UP	0	0.28	0.175	0.355	0.045	0.435	0.435	0.585	YES	TAIL-UP	0	0.035	0.29	-1.58	-0.945	-0.88	-0.405	0.495	2.075	YES	TRIM-DOWN	mmu-miR-676-3p	0	0.24	0.01	0.31	0.16	0.47	0.47	0.46	-0.01	-0.03	0	0	0.72	-1.69	-1.15	-0.88	-1.33	0.57	-1.02		0	0.32	0.34	0.4
51	mmu-miR-6944-3p	N/A	UP	0	0.03	-0.08	-0.01	-0.01	-0.135	-0.135	0.02	-		0	-0.335	-0.075	0.075	-0.4	-0.41	-0.1	-0.195	0.485	-	-	mmu-miR-6944-3p	0	0.03	-0.26	-0.27	-0.22	-0.26	-0.26	-0.23	0.24	0.92	0	-0.56	-0.24	-0.2	-0.52	-0.33	-0.28	-0.62	-1.95	-0.94	0	0.03	0.1	0.25
52	mmu-miR-877-5p	N/A	UP	0	0.1	0.345	-0.11	-0.04	-0.255	-0.255	-0.73	YES	TAIL-DOWN	0	-1.935	0.03	0.21	-0.58	-0.265	0.31	-0.625	2.245	YES	TRIM-DOWN	mmu-miR-877-5p	0	0.23	0.43	0.02	-0.04	-0.16	-0.16	-0.52	-1.47	-1.3	0	-1.92	0.08	0.36	-0.83	-0.4	0.84	-0.77	-2	-0.8	0	-0.03	0.26	-0.24
[truncated: 16 more columns]

## Sheet: HL in SD
short name	Serum regulation	GW Decay Class (2)	HALF LIFE (GW)	GW HL (min)	GW HL (max)	Lower	Upper	HALF LIFE (SD)	SD HL (min)	SD HL (max)	Lower	Upper
let-7b-5p	DOWN	FAST	8.69	6.5	13.1	2.19	4.41	20.1	14.3	34.1	5.8	14
miR-214-3p	DOWN	FAST	4.55	3.14	8.26	1.41	3.71	6.24	4.9	8.59	1.34	2.35
miR-503-5p	DOWN	FAST	3.2			0	0	3.82			0	0
miR-335-3p	DOWN	FAST	7.2	4.8	14.4	2.4	7.2	10.2	7.1	18.3	3.1	8.1
miR-351-5p	DOWN		12.7	5.63	48	7.07	35.3	7.69	5.27	14.2	2.42	6.51
miR-30b-5p	DOWN		12.5	7.29	42.9	5.21	30.4	24.3	9.76	48	14.54	23.7
miR-30c-5p	DOWN		16.2	8.99	48	7.21	31.8	13.4	7.78	47	5.62	33.6
miR-196b-5p	DOWN		10.8	6.66	29	4.14	18.2	12.1	8.13	23.5	3.97	11.4
miR-24-3p	UP	FAST	10.1	8.28	12.8	1.82	2.7	7.12	4.75	14.2	2.37	7.08
miR-155-5p	UP	FAST	12.3	9.41	17.6	2.89	5.3	17.5	10.1	48	7.4	30.5
miR-100-5p	UP	FAST	7.93	6.53	10.1	1.4	2.17	13.4	7.44	48	5.96	34.6
miR-221-3p	UP		16.3	13.4	20.9	2.9	4.6	18.6	15.7	22.8	2.9	4.2
miR-22-3p	UP		28	14.2	48	13.8	20	29.4	9.07	48	20.33	18.6
miR-20a-5p	UP	SLOW	42.2	18.6	48	23.6	5.8	35.3	11.5	48	23.8	12.7
miR-21a-5p	UP	SLOW	48	35.9	48	12.1	0	20.5	9.74	48	10.76	27.5
miR-92a-3p	UP	SLOW	48	48	48	0	0	48	48	48	0	0

## Sheet:  targets
N	miRNA NAME (miRBase21)	DECAY CLASS	SERUM REG FINAL	CPC_TG_s SD	CPC_TG_s 1h	CPC_TG_s 2h	CPC_TG_s 4h	CPC_TG_s 6h	CPC_TG_s 8h	CPC_TG_c3.03 SD	CPC_TG_c3.03 1h	CPC_TG_c3.03 2h	CPC_TG_c3.03 4h	CPC_TG_c3.03 6h	CPC_TG_c3.03 8h	CPC_TG_c3.05 SD	CPC_TG_c3.05 1h	CPC_TG_c3.05 2h	CPC_TG_c3.05 4h	CPC_TG_c3.05 6h	CPC_TG_c3.05 8h	short name	TG_s SD	TG_s 1h	TG_s 2h	TG_s 4h	TG_s 6h	TG_s 8h		TG_c3.03 SD	TG_c3.03 1h	TG_c3.03 2h	TG_c3.03 4h	TG_c3.03 6h	TG_c3.03 8h	MAX		TG_c3.05 SD	TG_c3.05 1h	TG_c3.05 2h	TG_c3.05 4h	TG_c3.05 6h	TG_c3.05 8h	MAX
1	mmu-let-7b-5p	FAST	DOWN	2413	2893	3270	3272	3243	4112	229.1	222.5	263	256.5	261.9	251.8	17.55	19.23	28.89	18.84	15.3	18.82	let-7b-5p	0	0.261738	0.438463	0.439345	0.426501	0.769012		0	-0.0421721	0.199085	0.162981	0.193039	0.136301	0.199085		0	0.131888	0.719099	0.102328	-0.197939	0.100796	0.719099
2	mmu-miR-214-3p	FAST	DOWN	5710	6811	8141	8530	8543	10651	795.7	1046.5	1198.9	1247.6	1166.4	1307	184.21	192.78	211.01	241.15	243.89	276.84	miR-214-3p	0	0.254376	0.511715	0.579055	0.581252	0.899426		0	0.395276	0.591415	0.648859	0.551766	0.715963	0.715963		0	0.065604	0.19596	0.388579	0.404879	0.587701	0.587701
3	mmu-miR-351-5p		DOWN	3032	3570	4156	4244	4285	5336	333.7	367.2	395.7	408.7	388.1	469.4	71	80.46	85.12	83.64	81.28	104.14	miR-351-5p	0	0.235654	0.454926	0.485155	0.499025	0.815489		0	0.138014	0.245855	0.292491	0.217877	0.492266	0.492266		0	0.180453	0.261679	0.236374	0.195081	0.552633	0.552633
4	mmu-miR-503-5p	FAST	DOWN	1502	1969	2344	2406	2425	3089	35.34	40.69	41.43	37.9	34.81	41.1							miR-503-5p	0	0.390578	0.642088	0.679752	0.6911	1.04026		0	0.203372	0.229374	0.100896	-0.0218002	0.217836	0.229374								0
5	mmu-miR-188-5p		DOWN	1120	1377	1609	1759	1728	2215													miR-188-5p	0	0.29803	0.522666	0.651257	0.625604	0.983808								0								0
6	mmu-miR-30b-5p		DOWN	2499	3232	4001	4254	3959	4916	295	626.9	1189.9	1082.5	825.6	865.8	108.68	411.03	937.97	793.94	567.19	563.69	miR-30b-5p	0	0.371076	0.67901	0.767469	0.663785	0.976134		0	1.08752	2.01205	1.87558	1.48473	1.55332	2.01205		0	1.91916	3.10946	2.86894	2.38375	2.37482	3.10946
7	mmu-miR-30c-5p		DOWN	2499	3232	4001	4254	3959	4916	267.3	600	1163.9	1057.1	800.3	843.9	73.77	376.84	903.49	760.96	535.52	534.36	miR-30c-5p	0	0.371076	0.67901	0.767469	0.663785	0.976134		0	1.1665	2.12244	1.98358	1.58208	1.65861	2.12244		0	2.35285	3.6144	3.36671	2.85983	2.85671	3.6144
8	mmu-miR-467a-5p		DOWN																			miR-467a-5p														0								0
9	mmu-miR-193a-3p		DOWN	2918	3438	3884	4006	4060	5117	123.5	191.4	238.1	243.2	215.8	246.5	11.65	11.12	8.44	9.47	9.83	12.61	miR-193a-3p	0	0.23659	0.412563	0.457183	0.4765	0.810318		0	0.63208	0.947057	0.977632	0.805184	0.997077	0.997077		0	-0.0671732	-0.465015	-0.298894	-0.245067	0.114238	0.114238
10	mmu-miR-335-3p	FAST	DOWN	386	478	493	432	420	555													miR-335-3p	0	0.30841	0.352987	0.16243	0.121788	0.523887								0								0
11	mmu-miR-196b-5p		DOWN	1190	1448	1680	1955	1992	2561	158.6	179	185	190.2	187.9	199.7	4.53	5.86	5.13	6.41	6.31	7.47	miR-196b-5p	0	0.2831	0.4975	0.716207	0.743256	1.10575		0	0.174567	0.222132	0.262124	0.244572	0.332442	0.332442		0	0.37139	0.179448	0.500813	0.478129	0.721597	0.721597
12	mmu-miR-324-5p		DOWN	2678	3267	3822	4010	3984	5037													miR-324-5p	0	0.28681	0.513172	0.582446	0.573062	0.911409								0								0
13	mmu-miR-92b-3p		DOWN	1610	1989	2317	2370	2280	2748	17.1	17.4	14.5	13.5	12.8	14	3.35	3.29	2.2	2.48	2.33	2.53	miR-92b-3p	0	0.304983	0.525197	0.557826	0.501973	0.771321		0	0.025091	-0.237943	-0.341037	-0.417853	-0.288569	0.025091		0	-0.0260735	-0.606658	-0.433821	-0.523831	-0.405024	0
14	mmu-let-7i-5p		UP	2413	2893	3270	3272	3243	4112	229.5	220.7	257.6	253.4	256.8	242	37.58	37.95	39.44	43.53	38.68	53.69	let-7i-5p	0	0.261738	0.438463	0.439345	0.426501	0.769012		0	-0.0564075	0.166638	0.142922	0.162151	0.0765129	0.166638		0	0.0141348	0.0696945	0.212045	0.0416227	0.514688	0.514688
15	mmu-miR-125a-5p	SLOW	UP	3032	3570	4156	4244	4285	5336	158.6	165.7	186.8	186.7	173.4	207.8	30.93	30.05	36.02	36.01	34.09	40.5	miR-125a-5p	0	0.235654	0.454926	0.485155	0.499025	0.815489		0	0.0631808	0.236102	0.235329	0.128711	0.389803	0.389803		0	-0.0416418	0.219791	0.219391	0.140342	0.388915	0.388915
16	mmu-miR-99b-5p	FAST	UP	627	692	746	763	734	935													miR-99b-5p	0	0.142307	0.25071	0.283218	0.227315	0.576501								0								0
17	mmu-miR-143-3p		UP	1393	1655	1948	2108	2153	2749	112.8	112	112.5	118.7	117	144	27.9	30.89	35.75	34.79	30.7	38.45	miR-143-3p	0	0.248636	0.483798	0.59768	0.628153	0.980712		0	-0.0102683	-0.00384207	0.0735529	0.0527415	0.352302	0.352302		0	0.146875	0.357678	0.318408	0.137974	0.462718	0.462718
18	mmu-miR-22-3p		UP	4020	5119	5673	5931	6060	7365	331.4	412.5	417.6	396.6	394.1	433.1	146.41	141.24	139.78	130.74	123.85	147.27	miR-22-3p	0	0.348667	0.496916	0.56108	0.592122	0.87349		0	0.315821	0.333548	0.259111	0.249988	0.386127	0.386127		0	-0.0518654	-0.0668561	-0.163313	-0.24142	0.00844948	0.00844948
19	mmu-miR-24-3p	FAST	UP	4883	5791	6494	7167	7481	9420	606.9	647.9	680.6	681.6	626.5	672.4	88.59	98.73	104.34	110.51	106.62	113.75	miR-24-3p	0	0.246045	0.41134	0.553602	0.615463	0.947959		0	0.0943123	0.165348	0.167467	0.0458557	0.147861	0.167467		0	0.156345	0.236077	0.318961	0.267262	0.360651	0.360651
20	mmu-miR-149-5p		UP	5169	6746	8513	9836	9992	11860	324.4	388.1	460.2	529.3	479.5	515.1	68.2	78.56	80.43	91.46	86.5	95.27	miR-149-5p	0	0.384147	0.719782	0.928187	0.950888	1.19815		0	0.258655	0.504487	0.706312	0.563757	0.667079	0.706312		0	0.204023	0.237962	0.423369	0.342928	0.48225	0.48225
21	mmu-miR-155-5p	FAST	UP	1470	1754	1822	1674	1556	1892	104.1	100.4	111	126.5	130.4	166.8	24.46	26.75	28.15	22.31	19.18	22.12	miR-155-5p	0	0.254833	0.309707	0.187483	0.0820259	0.364096		0	-0.0522108	0.0925896	0.281167	0.324974	0.680149	0.680149		0	0.129114	0.202711	-0.132734	-0.350822	-0.145073	0.202711
22	mmu-miR-17-5p	SLOW	UP	1894	2475	2677	2736	2556	3058	157.8	186.8	198.5	218.8	167.1	199.2	16.69	19.21	18.24	18.99	18.57	24.09	miR-17-5p	0	0.385992	0.499181	0.530632	0.432452	0.691152		0	0.243397	0.331042	0.471516	0.0826145	0.33612	0.471516		0	0.202874	0.128122	0.186256	0.15399	0.52945	0.52945
23	mmu-miR-19b-3p	SLOW	UP	2626	3531	4172	4314	4086	4962	249.1	331.5	458.6	551.6	445.7	498.6	96.03	107.17	101.61	109.32	105.03	135.72	miR-19b-3p	0	0.42721	0.667872	0.716159	0.637822	0.918055		0	0.412284	0.880511	1.1469	0.839348	1.00116	1.1469		0	0.158344	0.0814853	0.187	0.129244	0.499076	0.499076
24	mmu-miR-20a-5p	SLOW	UP	1894	2475	2677	2736	2556	3058	138.8	166.1	183.4	203.3	160.4	193.9	21.91	27.87	25.98	33.26	29.48	41.6	miR-20a-5p	0	0.385992	0.499181	0.530632	0.432452	0.691152		0	0.259045	0.401986	0.550603	0.208667	0.482305	0.550603		0	0.347124	0.245812	0.602199	0.428147	0.924994	0.924994
25	mmu-miR-92a-3p	SLOW	UP	1610	1989	2317	2370	2280	2748	16.2	17	14.6	13.1	12.6	13.6	3.35	3.29	2.2	2.48	2.33	2.53	miR-92a-3p	0	0.304983	0.525197	0.557826	0.501973	0.771321		0	0.0695409	-0.150025	-0.306427	-0.36257	-0.252387	0.0695409		0	-0.0260735	-0.606658	-0.433821	-0.523831	-0.405024	0
26	mmu-miR-21a-5p	SLOW	UP	942	1151	1363	1263	1162	1464	54.6	55.1	49.7	53.6	47	59.4	5.27	5.66	6.93	7.48	6.31	8.17	miR-21a-5p	0	0.289089	0.532987	0.423056	0.302811	0.636117		0	0.0131514	-0.135655	-0.026668	-0.21624	0.121562	0.121562		0	0.102999	0.395052	0.505235	0.259837	0.632533	0.632533
27	mmu-miR-29a-3p	SLOW	UP	4929	5939	7059	7213	7040	8454	433.8	503.2	555.1	527.6	443.6	554.2	138.94	142.64	136.17	107.68	78.55	87.19	miR-29a-3p	0	0.268925	0.518169	0.549304	0.51428	0.778339		0	0.214102	0.355718	0.282415	0.0322293	0.353377	0.355718		0	0.0379166	-0.0290531	-0.367712	-0.822779	-0.672227	0.0379166
28	mmu-miR-29b-3p	SLOW	UP	4929	5939	7059	7213	7040	8454	436.9	506.1	587.2	546.6	458.3	579.5	142.65	146.95	147.48	114.25	81.04	87.9	miR-29b-3p	0	0.268925	0.518169	0.549304	0.51428	0.778339		0	0.212119	0.426549	0.323182	0.0689892	0.407506	0.426549		0	0.0428456	0.0480396	-0.320286	-0.815774	-0.698545	0.0480396
29	mmu-miR-31-5p		UP	2536	3173	3753	4052	3955	4770	168.3	201	233.5	230.6	219.8	230.9	10.84	9.8	10.13	12.03	12.7	14.67	miR-31-5p	0	0.323293	0.56549	0.676079	0.641123	0.911435		0	0.25616	0.472387	0.454357	0.385156	0.456233	0.472387		0	-0.145511	-0.0977306	0.150272	0.228464	0.436504	0.436504
30	mmu-miR-365-3p	SLOW	UP	2163	3013	3496	3789	3595	4397	278.5	317	300.5	310.1	297.6	357.5	33.38	34.25	30.07	38.04	37.53	46.44	miR-365-3p	0	0.478167	0.692672	0.808783	0.732958	1.02349		0	0.186806	0.109688	0.155056	0.0956972	0.360266	0.360266		0	0.03712	-0.150659	0.188533	0.16906	0.476384	0.476384
31	mmu-miR-125b-5p	SLOW	UP	3032	3570	4156	4244	4285	5336	156.4	154.9	156.4	148.2	126.9	138.8	6.57	6.49	4.73	3.58	2.93	3.6	miR-125b-5p	0	0.235654	0.454926	0.485155	0.499025	0.815489		0	-0.0139034	0	-0.0776951	-0.301548	-0.172233	0		0	-0.0176749	-0.474053	-0.875934	-1.16499	-0.867896	0
32	mmu-miR-221-3p		UP	2410	3083	3750	4108	3906	4889	135.5	141.4	142.3	154.3	149	168.6	29.25	25.61	25.69	28.35	33.41	38.45	miR-221-3p	0	0.355302	0.637857	0.769403	0.696659	1.02051		0	0.0614893	0.0706428	0.187445	0.137019	0.315312	0.315312		0	-0.191729	-0.18723	-0.0450879	0.191843	0.394547	0.394547
33	mmu-miR-222-3p		UP	2410	3083	3750	4108	3906	4889	102	113.7	130.8	139.4	129.9	158.8	13.58	14.51	14.24	14.42	12.56	14.3	miR-222-3p	0	0.355302	0.637857	0.769403	0.696659	1.02051		0	0.156663	0.358793	0.450661	0.348832	0.638642	0.638642		0	0.095564	0.0684657	0.0865877	-0.112647	0.0745317	0.095564
34	mmu-miR-30a-5p	SLOW	UP	2499	3232	4001	4254	3959	4916	53.5	65.8	63.1	58.3	57.1	66.2	3.58	3.23	3.03	3.26	3.87	4.79	miR-30a-5p	0	0.371076	0.67901	0.767469	0.663785	0.976134		0	0.298549	0.238101	0.123957	0.0939519	0.307292	0.307292		0	-0.148425	-0.240642	-0.135088	0.112374	0.420066	0.420066
35	mmu-miR-100-5p	FAST	UP	627	692	746	763	734	935	10.4	13	16	19.6	16.5	22.6							miR-100-5p	0	0.142307	0.25071	0.283218	0.227315	0.576501		0	0.321928	0.621488	0.91427	0.665882	1.11974	1.11974								0
36	mmu-miR-151-3p		UP	1314	1540	1804	1964	1950	2370	78.8	97.8	98.6	101.6	104.9	114.7	14.72	15.86	18.92	21.06	26.38	25.26	miR-151-3p	0	0.228965	0.457234	0.57983	0.569509	0.850922		0	0.311639	0.323392	0.366633	0.412747	0.541598	0.541598		0	0.107615	0.362134	0.516728	0.841667	0.779077	0.841667
37	mmu-miR-296-5p		UP	3478	4036	4714	5246	5695	6955	51.1	56.3	62	75.5	74.9	100.2	39.73	44.63	48.53	59.22	59.92	85.13	miR-296-5p	0	0.214668	0.438694	0.59296	0.711438	0.999793		0	0.139812	0.278945	0.563153	0.551642	0.971487	0.971487		0	0.167785	0.288648	0.575856	0.592809	1.09944	1.09944
38	mmu-miR-501-3p	FAST	UP	1454	1751	2021	2193	2249	2988	161	163.6	177.3	187.8	171.2	213.3	17.69	17.35	17.89	14.38	12.98	17.06	miR-501-3p	0	0.268152	0.475042	0.592879	0.629256	1.03915		0	0.0231121	0.139132	0.222136	0.088622	0.405823	0.405823		0	-0.0279984	0.0162193	-0.29887	-0.446644	-0.0523164	0.0162193
39	mmu-miR-423-5p	SLOW	UP	5329	6354	7561	7758	7827	9485	567.5	658.9	651.8	587.8	499.8	505.2	82.19	84.84	86.42	79.38	65.67	64.42	miR-423-5p	0	0.2538	0.504712	0.54182	0.554595	0.831783		0	0.215439	0.199809	0.050705	-0.183269	-0.167766	0.215439		0	0.0457817	0.0724024	-0.0501873	-0.323728	-0.351454	0.0724024
40	mmu-miR-194-5p		UP	1826	2405	2812	2845	2583	3199	215.9	240.5	248.9	279.8	265.5	324	64.05	70.88	74.02	74.23	59.29	58.32	miR-194-5p	0	0.39735	0.62291	0.639742	0.500361	0.808934		0	0.155674	0.205203	0.374033	0.298349	0.585631	0.585631		0	0.14618	0.208717	0.212804	-0.11141	-0.135208	0.212804
41	mmu-miR-425-5p		UP	1993	2197	2393	2524	2642	3551	87.6	90.3	92.3	85.1	79.1	101.7	8.12	7.65	7.17	9.59	12.45	18.42	miR-425-5p	0	0.140593	0.263879	0.34077	0.406689	0.833284		0	0.0437951	0.0753998	-0.0417717	-0.147253	0.215317	0.215317		0	-0.08602	-0.179507	0.240051	0.616594	1.18172	1.18172
42	mmu-let-7f-5p		UP	2413	2893	3270	3272	3243	4112	227.7	220.8	253.8	237	239.6	223.6	148.46	138.26	163.53	152.99	162.95	129.01	let-7f-5p	0	0.261738	0.438463	0.439345	0.426501	0.769012		0	-0.0443941	0.156558	0.0577528	0.0734936	-0.0262141	0.156558		0	-0.10269	0.139481	0.0433631	0.134355	-0.202591	0.139481
43	mmu-let-7g-5p		UP	2413	2893	3270	3272	3243	4112	240.9	233.1	271.2	270	274.4	261.8	33.31	34.66	34.97	38.37	34.48	47.61	let-7g-5p	0	0.261738	0.438463	0.439345	0.426501	0.769012		0	-0.0474854	0.170923	0.164525	0.187846	0.120031	0.187846		0	0.0573163	0.0701624	0.204023	0.0498044	0.515309	0.515309
44	mmu-miR-129-5p		UP	688	861	916	1028	1076	1408	80.5	87.7	113.5	160.9	178.4	232.6	72.47	78.37	100.38	145.34	166.05	219.37	miR-129-5p	0	0.323605	0.412939	0.57936	0.645198	1.03317		0	0.123588	0.495632	0.999104	1.14805	1.53079	1.53079		0	0.112918	0.470016	1.00398	1.19616	1.59791	1.59791
45	mmu-miR-146b-5p		UP	1462	1680	1885	1923	1993	2537	204.2	188.7	196.4	204.2	198.1	235.4	36.39	37.97	38.31	39.28	38.14	43.4	miR-146b-5p	0	0.200518	0.366621	0.395415	0.446998	0.79518		0	-0.113888	-0.0561879	0	-0.043754	0.205131	0.205131		0	0.0613179	0.074179	0.110253	0.0677628	0.254153	0.254153
46	mmu-miR-1843a-5p		UP	2593	3131	3903	4334	4289	5281													miR-1843a-5p	0	0.272001	0.589961	0.741077	0.726019	1.02619								0								0
47	mmu-miR-1983	SLOW	UP	2286	2802	3374	3536	3536	4374	173.5	204.8	253.9	229.1	189.4	224	47.87	58.52	96.67	78.66	56.08	63.45	miR-1983	0	0.293632	0.561635	0.629293	0.629293	0.936128		0	0.23928	0.549325	0.401042	0.126501	0.368563	0.549325		0	0.289808	1.01395	0.716508	0.228365	0.406498	1.01395
48	mmu-miR-331-3p		UP	3148	4110	4970	5029	4960	5988													miR-331-3p	0	0.384703	0.65881	0.675836	0.655905	0.927639								0								0
49	mmu-miR-486a-5p		UP	1731	2063	2272	2401	2348	3040	401.9	411.9	443.4	442	421	453.6	31.94	36.85	45.98	40.47	40.44	37.8	miR-486a-5p	0	0.253138	0.392357	0.47203	0.439827	0.812466		0	0.0354575	0.141772	0.13721	0.0669837	0.174584	0.174584		0	0.2063	0.525642	0.341489	0.340419	0.243022	0.525642
50	mmu-miR-676-3p		UP	669	897	999	963	946	1177	25.3	26.8	23.9	23.4	19.9	22.6	8.31	9.84	9.43	10.71	9.53	10.91	miR-676-3p	0	0.423102	0.578478	0.52553	0.499834	0.815036		0	0.0830956	-0.0821268	-0.112629	-0.346369	-0.162815	0.0830956		0	0.24381	0.182409	0.366038	0.197628	0.392731	0.392731
51	mmu-miR-6944-3p	SLOW	UP																			miR-6944-3p														0								0
52	mmu-miR-877-5p		UP	1761	2233	2926	3025	2760	3318	8	8	8.4	7.4	7.3	7.5	3.16	3.46	4.1	2.84	2.31	1.96	miR-877-5p	0	0.342588	0.732535	0.78054	0.648273	0.913919		0	0	0.0703893	-0.112475	-0.132104	-0.0931094	0.0703893		0	0.130847	0.375699	-0.154034	-0.452032	-0.689071	0.375699

## Sheet: TPM
N	miRNA NAME (miRBase21)	miR family Targetscan	Seed+m8	guide?	Half Life (GW)	Decay Class x3	Decay Class x2	SERUM REG FINAL	REGULATED	TPM_s (0h	TPM_s 1h	TPM_s 2h	TPM_s 4h	TPM_s 6h	TPM_s 8h	TPM_3c.03 0h	TPM_3c.03 1h	TPM_3c.03 2h	TPM_3c.03 4h	TPM_3c.03 6h	TPM_3c.03 8h	TPM_3c.05 0h	TPM_3c.05 1h	TPM_3c.05 2h	TPM_3c.05 4h	TPM_3c.05 6h	TPM_3c.05 8h
1	mmu-let-7b-5p	let-7/98/4458/4500	GAGGUAG	guide	8.7	FAST	FAST	DOWN	YES	19.9092	21.7682	28.836	29.854	31.1827	43.1933	1.8903	1.6742	2.3192	2.3403	2.5183	2.645	0.1448	0.1447	0.2548	0.1719	0.1471	0.1977
2	mmu-miR-214-3p	miR-214/761/3619-5p	CAGCAGG	guide	4.6	FAST	FAST	DOWN	YES	87.8462	100.015	151.884	143.603	144.307	186.532	12.2415	15.3671	22.3675	21.0034	19.7027	22.8897	2.834	2.8308	3.9368	4.0598	4.1198	4.8483
3	mmu-miR-351-5p	miR-125a-5p/125b-5p/351/670/4319	CCCUGAG	guide	12.7	OTHER		DOWN	YES	8.2414	9.7355	10.9976	12.7601	14.063	19.6393	0.907	1.0014	1.0471	1.2288	1.2737	1.7276	0.193	0.2194	0.2252	0.2515	0.2668	0.3833
4	mmu-miR-503-5p	miR-503		guide	3.2	FAST		DOWN	YES	1668.89	3281.67	5860	8020	8083.33	10296.7	39.2667	67.8167	103.575	126.333	116.033	137
5	mmu-miR-188-5p	miR-188-5p		guide				DOWN	YES
6	mmu-miR-30b-5p	miR-30abcdef/30abe-5p/384-5p	GUAAACA	guide	12.5	OTHER		DOWN	YES	32.3286	39.852	60.9909	95.1678	97.7531	127.028	3.8163	7.73	18.1387	24.217	20.3852	22.3721	1.406	5.0682	14.2983	17.7615	14.0047	14.5656
7	mmu-miR-30c-5p	miR-30abcdef/30abe-5p/384-5p	GUAAACA	guide	16.2	OTHER		DOWN	YES	13.1734	16.7635	26.9973	45.0636	53.7908	67.8069	1.4091	3.112	7.8536	11.1981	10.8736	11.64	0.3889	1.9546	6.0964	8.061	7.2761	7.3705
8	mmu-miR-467a-5p	miR-290-3p/292-3p/467a/1420b		guide				DOWN	YES
9	mmu-miR-193a-3p	miR-193/193b/193a-3p	ACUGGCC	guide	13.1	OTHER		DOWN	YES	184.684	202.235	451.628	494.568	431.915	402.913	7.8165	11.2588	27.686	30.0247	22.9574	19.4094	0.7373	0.6541	0.9814	1.1691	1.0457	0.9929
10	mmu-miR-335-3p	miR-335-3p		pass (equlibrium)	7.2	FAST	FAST	DOWN	YES
11	mmu-miR-196b-5p	miR-196abc	AGGUAGU	N/A	10.8	OTHER		DOWN	YES	50	59.3443	76.7123	115.68	120.727	157.117	6.6639	7.3361	8.4475	11.2544	11.3879	12.2515	0.1903	0.2402	0.2342	0.3793	0.3824	0.4583
12	mmu-miR-324-5p	miR-324-5p		N/A				DOWN	YES
13	mmu-miR-92b-3p	miR-25/32/92abc/363/363-3p/367	AUUGCAC	N/A	35.4	OTHER		DOWN	YES	119.259	148.433	151.438	161.225	161.702	213.023	1.2667	1.2985	0.9477	0.9184	0.9078	1.0853	0.2481	0.2455	0.1438	0.1687	0.1652	0.1961
14	mmu-let-7i-5p	let-7/98/4458/4500	GAGGUAG	guide	25.4	OTHER		UP	YES	2.1522	2.274	2.2248	2.4363	2.2295	2.4652	0.2047	0.1735	0.1753	0.1887	0.1765	0.1451	0.0335	0.0298	0.0268	0.0324	0.0266	0.0322
15	mmu-miR-125a-5p	miR-125a-5p/125b-5p/351/670/4319	CCCUGAG	guide	26.8	SLOW	SLOW	UP	YES	3.6685	4.1975	4.57	3.7839	4.3165	5.5135	0.1919	0.1948	0.2054	0.1665	0.1747	0.2147	0.0374	0.0353	0.0396	0.0321	0.0343	0.0418
16	mmu-miR-99b-5p	miR-99ab/100	ACCCGUA	guide	10.9	FAST	FAST	UP	YES
17	mmu-miR-143-3p	miR-143/1721/4770	GAGAUGA	guide	11.8	OTHER		UP	YES	0.1829	0.197	0.2142	0.2587	0.2387	0.2565	0.0148	0.0133	0.0124	0.0146	0.013	0.0134	0.0037	0.0037	0.0039	0.0043	0.0034	0.0036
18	mmu-miR-22-3p	miR-22/22-3p	AGCUGCC	guide	28	OTHER		UP	YES	0.3588	0.4558	0.4655	0.408	0.3916	0.448	0.0296	0.0367	0.0343	0.0273	0.0255	0.0263	0.0131	0.0126	0.0115	0.009	0.008	0.009
19	mmu-miR-24-3p	miR-24/24ab/24-3p	GGCUCAG	guide	10.1	FAST	FAST	UP	YES	112.253	132.517	136.429	142.202	144.143	181.154	13.9517	14.8261	14.2983	13.5238	12.0713	12.9308	2.0366	2.2593	2.192	2.1927	2.0543	2.1875
20	mmu-miR-149-5p	miR-149	CUGGCUC	guide	22.6	OTHER		UP	YES	760.147	630.467	595.315	293.612	220.088	259.519	47.7059	36.271	32.1818	15.8	10.5617	11.2713	10.0294	7.3421	5.6245	2.7301	1.9053	2.0847
21	mmu-miR-155-5p	miR-155	UAAUGCU	guide	12.3	FAST	FAST	UP	YES	267.273	313.214	119.085	48.8047	47.1515	66.386	18.9273	17.9286	7.2549	3.688	3.9515	5.8526	4.4473	4.7768	1.8399	0.6504	0.5812	0.7761
22	mmu-miR-17-5p	miR-17/17-5p/20ab/20b-5p/93/106ab/427/518a-3p/519d	AAAGUGC	guide	38.2	SLOW	SLOW	UP	YES	155.246	202.869	230.776	186.122	147.746	149.171	12.9344	15.3115	17.1121	14.8844	9.659	9.7171	1.368	1.5746	1.5724	1.2918	1.0734	1.1751
23	mmu-miR-19b-3p	miR-19ab	GUGCAAA	guide	48	SLOW	SLOW	UP	YES	198.939	321	386.296	526.098	459.101	420.509	18.8712	30.1364	42.463	67.2683	50.0787	42.2542	7.275	9.7427	9.4083	13.3317	11.8011	11.5017
24	mmu-miR-20a-5p	miR-17/17-5p/20ab/20b-5p/93/106ab/427/518a-3p/519d	AAAGUGC	guide	42.2	SLOW	SLOW	UP	YES	274.493	375	382.429	364.8	300.706	308.889	20.1159	25.1667	26.2	27.1067	18.8706	19.5859	3.1754	4.2227	3.7114	4.4347	3.4682	4.202
25	mmu-miR-92a-3p	miR-25/32/92abc/363/363-3p/367	AUUGCAC	guide	48	SLOW	SLOW	UP	YES	1.9356	2.1995	2.6354	2.2636	1.9795	2.1679	0.0195	0.0188	0.0166	0.0125	0.0109	0.0107	0.004	0.0036	0.0025	0.0024	0.002	0.002
26	mmu-miR-21a-5p	miR-21/590-5p	AGCUUAU	guide	48	SLOW	SLOW	UP	YES	0.1957	0.2307	0.2415	0.2514	0.1979	0.1984	0.0113	0.011	0.0088	0.0107	0.008	0.008	0.0011	0.0011	0.0012	0.0015	0.0011	0.0011
27	mmu-miR-29a-3p	miR-29abcd	AGCACCA	guide	31.3	SLOW	SLOW	UP	YES	23.0005	26.5371	30.6913	23.2903	20.5248	21.5115	2.0243	2.2484	2.4135	1.7036	1.2933	1.4102	0.6483	0.6374	0.592	0.3477	0.229	0.2219
28	mmu-miR-29b-3p	miR-29abcd	AGCACCA	guide	48	SLOW	SLOW	UP	YES	947.885	1319.78	1568.67	1602.89	1173.33	1056.75	84.0192	112.467	130.489	121.467	76.3833	72.4375	27.4327	32.6556	32.7733	25.3889	13.5067	10.9875
29	mmu-miR-31-5p	miR-31	GGCAAGA	guide	13.5	OTHER		UP	YES	3.1495	3.6106	4.1169	4.1175	3.7634	4.0355	0.209	0.2287	0.2561	0.2343	0.2092	0.1953	0.0135	0.0112	0.0111	0.0122	0.0121	0.0124
30	mmu-miR-365-3p	miR-33a-3p/365/365-3p	AAUGCCC	guide	48	SLOW	SLOW	UP	YES	92.8326	114.129	128.529	122.621	113.05	142.298	11.9528	12.0076	11.0478	10.0356	9.3585	11.5696	1.4326	1.2973	1.1055	1.2311	1.1802	1.5029
31	mmu-miR-125b-5p	miR-125a-5p/125b-5p/351/670/4319	CCCUGAG	guide	41.3	SLOW	SLOW	UP	YES	5.4769	5.7936	6.7676	5.7151	5.8371	7.128	0.2825	0.2514	0.2547	0.1996	0.1729	0.1854	0.0119	0.0105	0.0077	0.0048	0.004	0.0048
32	mmu-miR-221-3p	miR-221/222/222ab/1928	GCUACAU	guide	16.3	OTHER		UP	YES	24.2699	24.9031	26.0598	30.6339	28.1007	32.038	1.3646	1.1422	0.9889	1.1506	1.0719	1.1048	0.2946	0.2069	0.1785	0.2114	0.2404	0.252
33	mmu-miR-222-3p	miR-221/222/222ab/1928	GCUACAU	guide	14.1	OTHER		UP	YES	25.026	29.1399	32.2442	25.187	20.186	18.8473	1.0592	1.0747	1.1247	0.8547	0.6713	0.6122	0.141	0.1371	0.1224	0.0884	0.0649	0.0551
34	mmu-miR-30a-5p	miR-30abcdef/30abe-5p/384-5p	GUAAACA	guide	27.6	SLOW	SLOW	UP	YES	3.4111	4.2882	5.0994	5.9722	4.8889	4.9442	0.073	0.0873	0.0804	0.0818	0.0705	0.0666	0.0049	0.0043	0.0039	0.0046	0.0048	0.0048
35	mmu-miR-100-5p	miR-99ab/100	ACCCGUA	guide	7.9	FAST	FAST	UP	YES	0.8307	0.737	0.8084	0.8406	0.7555	0.9444	0.0138	0.0138	0.0173	0.0216	0.017	0.0228
36	mmu-miR-151-3p	miR-151-3p	UAGACUG	guide	27.9	OTHER		UP	YES	1.8855	2.0042	2.1965	2.3035	2.0905	2.4056	0.1131	0.1273	0.1201	0.1192	0.1125	0.1164	0.0211	0.0206	0.023	0.0247	0.0283	0.0256
37	mmu-miR-296-5p	miR-296-5p	GGGCCCC	guide	14.9	OTHER		UP	YES	285.082	395.686	420.893	494.906	372.222	437.421	4.1885	5.5196	5.5357	7.1226	4.8954	6.3019	3.2566	4.3755	4.333	5.5868	3.9163	5.3541
38	mmu-miR-501-3p	miR-501-3p/502-3p/500/502a	AUGCACC	guide	7.9	FAST	FAST	UP	YES	24.6024	25.75	33.4603	27.6545	26.6785	39.4716	2.7242	2.4059	2.9354	2.3682	2.0308	2.8177	0.2993	0.2551	0.2962	0.1813	0.154	0.2254
39	mmu-miR-423-5p	miR-423a/423-5p/3184/3573-5p	GAGGGGC	guide	35.5	SLOW	SLOW	UP	YES	76.7867	94.6945	94.5125	75.3204	76.8861	86.859	8.1772	9.8197	8.1475	5.7068	4.9096	4.6264	1.1843	1.2644	1.0803	0.7707	0.6451	0.5899
40	mmu-miR-194-5p	miR-194	GUAACAG	guide	33.5	OTHER		UP	YES	456.5	559.302	703	711.25	587.045	615.192	53.975	55.9302	62.225	69.95	60.3409	62.3077	16.0125	16.4837	18.505	18.5575	13.475	11.2154
41	mmu-miR-425-5p	miR-425/425-5p/489	AUGACAC	guide	9.5	OTHER		UP	YES	88.9732	90.7851	99.2946	95.2453	96.7766	122.872	3.9107	3.7314	3.8299	3.2113	2.8974	3.519	0.3625	0.3161	0.2975	0.3619	0.456	0.6374
42	mmu-let-7f-5p	let-7/98/4458/4500	GAGGUAG	guide	19.1	OTHER		UP	YES	0.9041	1.0275	0.8614	1.0319	1.0071	1.0935	0.0853	0.0784	0.0669	0.0747	0.0744	0.0595	0.0556	0.0491	0.0431	0.0482	0.0506	0.0343
43	mmu-let-7g-5p	let-7/98/4458/4500	GAGGUAG	N/A	12.3	OTHER		UP	YES	9.7338	11.5489	8.1852	11.9416	11.9978	14.0293	0.9718	0.9305	0.6788	0.9854	1.0152	0.8932	0.1344	0.1384	0.0875	0.14	0.1276	0.1624
44	mmu-miR-129-5p	miR-129-5p/129ab-5p	UUUUUGC	N/A	16.1	OTHER		UP	YES	237.241	246	140.923	133.506	123.678	154.725	27.7586	25.0571	17.4615	20.8961	20.5057	25.5604	24.9897	22.3914	15.4431	18.8753	19.0862	24.1066
45	mmu-miR-146b-5p	miR-146ac/146b-5p	GAGAACU	N/A	24	OTHER		UP	YES	35.6585	37.1681	33.7814	27.7489	20.4201	24.5833	4.9805	4.1748	3.5197	2.9466	2.0297	2.281	0.8876	0.84	0.6866	0.5668	0.3908	0.4205
46	mmu-miR-1843a-5p	miR-1843-5p/4802-5p		N/A				UP	YES
47	mmu-miR-1983	miR-412-3p/1983	UCACCUG	too low	43.8	SLOW	SLOW	UP	YES	415.636	500.357	602.5	552.5	544	616.056	31.5455	36.5714	45.3393	35.7969	29.1385	31.5493	8.7036	10.45	17.2625	12.2906	8.6277	8.9366
48	mmu-miR-331-3p	miR-331/331-3p		N/A				UP	YES
49	mmu-miR-486a-5p	miR-486-5p/3107	CCUGUAC	N/A	26.1	OTHER		UP	YES	494.571	528.974	540.952	490	350.448	467.692	114.829	105.615	105.571	90.2041	62.8358	69.7846	9.1257	9.4487	10.9476	8.2592	6.0358	5.8154
50	mmu-miR-676-3p	miR-676.m	CGUCCUG	N/A	18.7	OTHER		UP	YES	267.6	332.222	285.429	246.923	270.286	346.176	10.12	9.9259	6.8286	6	5.6857	6.6471	3.324	3.6444	2.6943	2.7462	2.7229	3.2088
51	mmu-miR-6944-3p	NOT PRESENT		N/A	48	SLOW	SLOW	UP	YES
52	mmu-miR-877-5p	miR-877	UAGAGGA	N/A	14	OTHER		UP	YES	978.333	1313.53	2090	1260.42	1150	1228.89	4.4444	4.7059	6	3.0833	3.0417	2.7778	1.7556	2.0353	2.9286	1.1833	0.9625	0.7259
53	mmu-miR-34a-5p	miR-34ac/34bc-5p/449abc/449c-5p	GGCAGUG	guide	48	SLOW	SLOW			327.956	433.307	482.403	586.019	572.589	752.212	27.4015	32.2016	33.8372	45.0556	41.1786	51.2019	9.7204	12.229	13.9287	18.5657	18.2	23.4663
54	mmu-miR-335-5p	miR-335/335-5p	CAAGAGC	guide	4.7	FAST	FAST			17.3928	24.6078	35.1223	38.7315	38.8909	41.3727	0.1079	0.123	0.2617	0.2331	0.1925	0.1979	0.0325	0.038	0.0864	0.0806	0.061	0.0575
55	mmu-miR-301a-3p	miR-130ac/301ab/301b/301b-3p/454/721/4295/3666	AGUGCAA	guide	48	SLOW	SLOW			27.1663	41.4085	43.4305	56.3084	46.7336	52.4703	2.0972	2.562	2.0199	2.5389	2.3963	2.4988	0.3281	0.3886	0.2686	0.4123	0.4028	0.3973
56	mmu-miR-374b-5p	miR-374ab		guide
57	mmu-miR-15b-5p	miR-15abc/16/16abc/195/322/424/497/1907	AGCAGCA	guide	37.5	SLOW	SLOW			165.745	154.588	223.964	228.262	219.38	268.235	19.6677	17.3035	23.0621	23.9972	21.4528	23.7008	3.2699	2.64	3.3488	3.5444	3.3431	3.7693
58	mmu-miR-301b-3p	miR-130ac/301ab/301b/301b-3p/454/721/4295/3666	AGUGCAA	guide	48	SLOW	SLOW			400	525	555.763	634.211	572.295	649.706	30.8793	32.4821	25.8475	28.5965	29.3443	30.9412	3.1224	2.9518	1.4966	1.7018	1.8361	2.0382
59	mmu-miR-182-5p	miR-182	UUGGCAA	guide	9.1	FAST	FAST			1.7049	1.9481	2.2127	2.4372	2.2959	2.5236	0.1885	0.1977	0.2128	0.271	0.2479	0.2528	0.0767	0.0725	0.0822	0.1062	0.1004	0.0982
60	mmu-miR-148b-3p	miR-148ab-3p/152	CAGUGCA	N/A	48	OTHER				178.974	214.836	278.153	280.046	260.357	278.106	25.8103	24.8873	25.0541	26.7306	23.8661	23.7273	2.5251	2.3113	1.7797	1.7932	1.767	1.8583
61	mmu-miR-1839-5p	miR-1348/1839/1839-5p/3927	AGGUAGA	N/A	11.9	OTHER				122.857	136.143	132.69	181.449	184.648	219.167	19.2698	18.05	14.883	19.1522	18.4366	21.6538	3.1167	2.9557	2.7947	4.4543	4	4.6808
62	mmu-miR-28a-5p	miR-28-5p/708/1407/1653/3139	AGGAGCU	N/A	14.9	OTHER				88.4161	103.087	121.407	122.712	114.113	146.256	6.6553	17.3955	32.893	25.5397	17.1502	18.7	0.1276	0.1524	0.2141	0.143	0.1015	0.1221
63	mmu-let-7a-5p	let-7/98/4458/4500	GAGGUAG	guide	13	OTHER				3.2324	3.7142	3.3158	3.458	3.4522	4.2718	0.3167	0.297	0.2696	0.2677	0.2716	0.252	0.0113	0.0143	0.0087	0.0097	0.0099	0.01
64	mmu-let-7c-5p	let-7/98/4458/4500	GAGGUAG	guide	11.7	FAST	FAST			3.9964	4.237	4.536	4.5319	4.4998	5.9846	0.3831	0.331	0.3629	0.3457	0.3488	0.3493	0.014	0.0163	0.0119	0.0128	0.0129	0.014
65	mmu-let-7d-5p	let-7/98/4458/4500	GAGGUAG	guide	14.6	OTHER				13.1355	15.621	14.9179	13.5768	15	19.0547	0.509	0.5583	0.4316	0.4826	0.5296	0.6668	0.0247	0.0193	0.0166	0.0161	0.0175	0.0226
66	mmu-let-7e-5p	let-7/98/4458/4500	GAGGUAG	guide	22.7	OTHER				10.9334	12.1606	11.7373	12.4127	13.0032	16.3825	1.0254	0.9231	0.9092	0.898	0.9583	0.8896	0.0384	0.0467	0.0307	0.0349	0.0373	0.0383
67	mmu-miR-101a-3p	miR-101/101ab		guide
68	mmu-miR-101b-3p	miR-101/101ab	ACAGUAC	N/A	20	OTHER				74.5355	93.125	107.608	132.61	116.12	122.911	2.7268	3.8859	2.8952	3.1604	2.6503	2.4978	0.303	1.3668	0.3841	0.3362	0.2866	0.2751
69	mmu-miR-103-3p	miR-103a/107/107ab	GCAGCAU	guide	13.4	FAST	FAST			17.619	20.5222	24.7212	27.5758	24.9782	29.2236	0.9187	0.9916	1.0967	1.1026	0.9424	1.021	0.3057	0.3107	0.3619	0.3989	0.3224	0.2941
70	mmu-miR-106b-5p	miR-17/17-5p/20ab/20b-5p/93/106ab/427/518a-3p/519d		guide
71	mmu-miR-107-3p	miR-103a/107/107ab	GCAGCAU	N/A	27.8	OTHER				333.407	393	483.3	518.7	473.211	568	17.1758	18.85	21.36	20.65	17.7523	19.7	5.7846	5.949	7.075	7.503	6.1083	5.7155
72	mmu-miR-1198-5p	miR-1198-5p	AUGUGUU	N/A	17.1	OTHER				166.901	194.605	263.226	265.938	246.032	304.154	71.3521	57.3553	82.4194	84.625	80.4444	92.1231	1.1183	1.1368	2.1645	2.1688	1.6603	1.9031
73	mmu-miR-1249-3p	miR-1249	CGCCCUU	guide	10.6	FAST	FAST			270.312	467.273	495.2	431.562	364.865	456.667	19.0625	37.2273	46.28	50.8125	34.4054	29.6667
74	mmu-miR-128-3p	miR-128/128ab	CACAGUG	N/A	21.1	OTHER				272.014	250.933	305.73	302.64	354.314	466.781	13.3611	10.2591	11.5112	10.4831	11.4641	12.8767	0.5563	0.428	0.4129	0.3534	0.717	0.6548
75	mmu-miR-130a-3p	miR-130ac/301ab/301b/301b-3p/454/721/4295/3666	AGUGCAA	guide	42	SLOW	SLOW			40.9894	50	60.1651	56.0465	49.4476	57.526	10.9841	12.3997	14.6972	13.0574	10.17	10.6055	2.4668	2.7842	3.293	2.813	2.015	1.9171
76	mmu-miR-130b-3p	miR-130ac/301ab/301b/301b-3p/454/721/4295/3666	AGUGCAA	guide	40.4	SLOW	SLOW			156.757	186.076	223.061	217.771	210.301	253.908	34.0338	46.6772	41.9388	38.8916	36.8313	38.2586	3.6689	3.7386	4.7143	4.4524	4.0247	4.4966
77	mmu-miR-138-5p	miR-138/138ab	GCUGGUG	N/A	11.8	OTHER				2421.25	2718.82	4498.33	3545.62	3576.25	3215	170.562	201.471	321.417	253.562	237	210.227	16.9	27.5118	55.7	32.9375	25.4125	19.8682
78	mmu-miR-140-3p	miR-140-3p	ACCACAG	guide	7.8	FAST	FAST
79	mmu-miR-145a-5p	miR-145	UCCAGUU	guide	13	OTHER				43.1322	52.3444	92.2254	97.0914	84.1932	105.998	3.9641	3.7978	5.8844	6.5789	5.9389	7.4526	0.3427	0.3157	0.4822	0.5107	0.4485	0.444
80	mmu-miR-148a-3p	miR-148ab-3p/152	CAGUGCA	N/A	10.7	OTHER				51.6272	64.4507	76.6129	98.9194	88.7671	96.3517	7.4689	7.4648	6.8213	9.3177	8.0974	8.2388	0.7259	0.7134	0.4998	0.6365	0.5915	0.6413
81	mmu-miR-152-3p	miR-148ab-3p/152	CAGUGCA	guide	6.3	FAST	FAST			177.157	202.478	315.051	360.765	308.571	327.768	25.3553	23.1018	27.6735	33.4824	27.6032	27.5134	2.9462	2.615	2.6265	3.2918	2.7894	2.9067
82	mmu-miR-15a-5p	miR-15abc/16/16abc/195/322/424/497/1907	AGCAGCA	guide	28.4	OTHER				257.826	333.502	427.684	426.17	423.906	519.208	20.6329	24.2589	28.678	29.4894	28.8542	31.8366	2.628	2.9701	3.6418	3.9851	3.8141	4.3292
83	mmu-miR-16-5p	miR-15abc/16/16abc/195/322/424/497/1907	AGCAGCA	guide	48	SLOW	SLOW			5.078	6.0442	7.2274	7.3236	7.5389	8.4806	0.2015	0.2105	0.2542	0.2607	0.2495	0.2587	0.0214	0.0254	0.0302	0.0263	0.0241	0.0241
84	mmu-miR-181a-5p	miR-181abcd/4262	ACAUUCA	guide	26.3	SLOW	SLOW			1.1894	1.4909	1.7044	1.8218	1.3947	1.6857	0.0453	0.0491	0.0453	0.0452	0.0368	0.0432	0.0011	0.0022	0.0015	0.0008	0.0005	0.0005
85	mmu-miR-181b-5p	miR-181abcd/4262	ACAUUCA	guide	28.8	SLOW	SLOW			10.5267	13.5099	14.628	15.6117	12.5612	15.1589	0.4008	0.4451	0.3891	0.3873	0.3317	0.3888	0.014	0.0245	0.0154	0.0103	0.008	0.0084
86	mmu-miR-181c-5p	miR-181abcd/4262	ACAUUCA	too low	45	OTHER				24.3619	34.1118	39.2183	40.7746	31.1997	36.3406	0.2533	0.2904	0.212	0.1893	0.165	0.2106	0.0778	0.0947	0.049	0.029	0.0305	0.0408
87	mmu-miR-181d-5p	miR-181abcd/4262	ACAUUCA	too low	17.9	OTHER				87.0068	112.434	126.889	137.041	111.667	129.072	3.7789	4.1086	3.811	3.9734	3.4463	4.0371	0.5561	0.6155	0.7	0.7861	0.8025	0.9867
88	mmu-miR-183-5p	miR-183	AUGGCAC	guide	17.3	OTHER				21.0798	22.3368	27.6946	30.0057	26.123	32.8409	1.7682	1.9573	2.4528	2.3341	1.7154	2.0382	0.4343	0.4534	0.5831	0.6414	0.5363	0.6625
89	mmu-miR-1843b-5p	miR-1843b-5p	UGGAGGU	N/A	11.7	OTHER				691.667	790	756.25	895.714	734.762	835.778	54.7333	57.9688	46.7	49.6857	35.8095	38.4222	0.7833	0.925	1	1.5343	1.2357	1.3822
90	mmu-miR-186-5p	miR-186	AAAGAAU	guide	48	SLOW	SLOW			3.284	4.8655	5.3195	6.1007	6.1333	6.6631	1.0406	1.4596	1.083	1.0808	1.067	1.1944	0.1951	0.2084	0.1638	0.1557	0.1425	0.1671
91	mmu-miR-191-5p	miR-191	AACGGAA	guide	48	OTHER				0.782	0.87	1.0028	1.0065	0.9726	1.2557	0.3114	0.3124	0.3341	0.3273	0.2921	0.3652	0.0198	0.0204	0.0215	0.0198	0.0181	0.0223
92	mmu-miR-192-5p	miR-192/215	UGACCUA	guide	48	SLOW	SLOW			19.5764	22.8777	23.7129	29.8282	26.5772	30.3079	1.5396	1.7644	1.9356	2.8531	2.552	2.7845	0.0438	0.052	0.0358	0.0284	0.0126	0.0106
93	mmu-miR-193b-3p	miR-193/193b/193a-3p		guide
94	mmu-miR-199a-3p	miR-199ab-3p/3129-5p	CAGUAGU	guide	9.6	FAST	FAST			2.9655	3.6484	3.728	4.3626	4.4837	4.9741	0.2115	0.2645	0.2817	0.3495	0.3083	0.3081	0.0486	0.0731	0.0801	0.0867	0.0767	0.0711
95	mmu-miR-205-5p	miR-205/205ab	CCUUCAU	too low	7.8	FAST	FAST			215.694	280.845	331.714	356.719	317.879	407.121	8.8472	8.3662	8.7143	8.4375	7.1515	8.4394	2.225	2.5141	2.3971	1.6688	0.8727	0.9182
96	mmu-miR-210-3p	miR-210		guide
97	mmu-miR-218-5p	miR-218/218a	UGUGCUU	guide	48	SLOW	SLOW			138.571	151.706	163.277	214.82	222.857	251.242	13.4091	13.9118	15.6102	24.9137	25.3383	28.1961	0.9623	0.9506	0.9537	1.305	1.1233	1.2078
98	mmu-miR-224-5p	miR-224	AAGUCAC	guide	9.2	FAST	FAST			385.97	393.418	455.789	422.857	476.447	649.333	26.0597	23.1646	25.4211	23.75	21.4474	22.92	3.8104	3.5734	4.1079	3.6845	3.3237	3.1707
99	mmu-miR-23a-3p	miR-23abc/23b-3p	UCACAUU	guide	22.7	OTHER				23.0268	25.6092	30.5051	30.7535	30.6334	40.4707	0.7229	0.7256	0.7935	0.901	0.9003	1.0607	0.1767	0.1593	0.1736	0.1634	0.1497	0.1676
100	mmu-miR-23b-3p	miR-23abc/23b-3p	UCACAUU	guide	13	OTHER				9.6724	9.9872	12.7846	12.783	13.03	16.648	0.2998	0.2825	0.3316	0.3727	0.3821	0.4346	0.0523	0.0458	0.0578	0.0563	0.0527	0.0568
101	mmu-miR-25-3p	miR-25/32/92abc/363/363-3p/367	AUUGCAC	guide	48	SLOW	SLOW			4.008	4.3647	4.7257	5.3223	5.0132	5.5092	0.0144	0.0125	0.0098	0.0112	0.011	0.0124	0.002	0.0027	0.0019	0.0019	0.003	0.0033
102	mmu-miR-26a-5p	miR-26ab/1297/4465	UCAAGUA	guide	12.2	OTHER				0.5377	0.6979	0.8037	0.7545	0.7339	0.9967	0.0264	0.0291	0.0283	0.0271	0.0242	0.0317	0.0036	0.0038	0.0031	0.0028	0.0021	0.0028
103	mmu-miR-26b-5p	miR-26ab/1297/4465	UCAAGUA	N/A	9.4	OTHER				8.7571	11.3844	13.1142	12.8234	12.0297	14.2402	0.4136	0.4585	0.4402	0.4175	0.3507	0.4028	0.061	0.0644	0.0523	0.0497	0.0366	0.0445
104	mmu-miR-27a-3p	miR-27abc/27a-3p	UCACAGU	guide	48	OTHER				39.5112	49.9135	61.2645	54.3662	50.8333	54.9445	1.8727	1.9875	2.2508	2.3491	2.0088	1.9624	0.223	0.2114	0.2976	0.3895	0.2858	0.2402
105	mmu-miR-27b-3p	miR-27abc/27a-3p	UCACAGU	guide	21.9	OTHER				0.8049	1.0228	1.1419	1.1187	0.9948	1.1454	0.0417	0.044	0.0455	0.0527	0.0438	0.046	0.005	0.0048	0.0061	0.0087	0.006	0.0054
106	mmu-miR-298-5p	miR-298/2347/2467-3p	GCAGAGG	guide	8.8	FAST	FAST			27.1741	32.52	35.0795	31.7654	34.6987	40.4779	5.0992	4.6361	4.2906	3.8603	4.149	4.7273	0.6578	0.6442	0.6481	0.6202	0.617	0.7633
107	mmu-miR-29c-3p	miR-29abcd		guide
108	mmu-miR-30d-5p	miR-30abcdef/30abe-5p/384-5p	GUAAACA	guide	15.7	OTHER				3.0295	3.7651	4.3045	4.2651	3.802	4.7567	0.0686	0.0835	0.0808	0.0773	0.0705	0.0823	0.0043	0.0038	0.0033	0.0033	0.0037	0.0046
109	mmu-miR-30e-5p	miR-30abcdef/30abe-5p/384-5p	GUAAACA	guide	48	SLOW	SLOW			11.5427	16.2005	19.2079	21.2806	18.6218	21.9759	0.454	0.5323	0.4758	0.5373	0.5503	0.6875	0.158	0.1845	0.1641	0.2156	0.2165	0.2854
110	mmu-miR-320-3p	miR-320abcd/4429	AAAGCUG	guide	9.9	FAST	FAST			45.0376	59.9734	58.1818	58.5126	60.4556	89.0741	7.3709	8.5532	8.1068	9.7597	10.2806	14.4233	1.9386	2.334	2.2418	2.9117	3.1847	4.6405
111	mmu-miR-322-5p	miR-15abc/16/16abc/195/322/424/497/1907	AGCAGCA	guide	10.6	OTHER				37.4526	49.4729	56.0326	64.0448	66.0633	81.051	4.8849	6.116	6.3657	6.7186	6.3231	6.9876	0.5776	0.8587	0.7512	0.8364	0.825	0.9413
112	mmu-miR-328-3p	miR-328a/328b-3p	UGGCCCU	N/A	10	FAST	FAST			213.647	231.015	265.078	295.508	306.811	374.096	17.1176	16.3147	19.4093	21.6631	19.9838	22.1117	8.1876	7.8025	10.5161	12.1422	9.9627	11.5516
113	mmu-miR-340-5p	miR-340-5p		guide
114	mmu-miR-342-3p	miR-342-3p	CUCACAC	N/A	17.5	OTHER				149.097	158.895	205.772	191.839	181.223	248.901	12.6129	12.25	12.8591	12.9138	13.383	16.6099	2.6955	2.9134	3.6221	3.1103	3.016	2.9176
115	mmu-miR-344-3p	miR-344a-3p/344c		guide
116	mmu-miR-344b-3p	miR-344b	AUUUAGC	N/A	10.9	OTHER				275.556	321.034	354.193	384.483	404.815	416.176	2.6667	1.8276	1.8387	2	2.2593	2.0588	1.2852	0.7552	0.7	0.8414	1.0963	1.1029
117	mmu-miR-34c-5p	miR-34ac/34bc-5p/449abc/449c-5p	GGCAGUG	N/A	29.9	OTHER				397.611	467.217	555.625	555.175	493.308	554.823	25.0177	34.313	43.1339	41.8333	32.2769	31.5106	3.685	4.0583	4.6313	4.8202	4.2577	4.6688
118	mmu-miR-361-5p	miR-361-5p	UAUCAGA	N/A	20.7	OTHER				156.702	149.633	214.396	214.404	254	364.607	18.8191	17.789	23.6813	20.9174	21.4	29.6067	6.9755	6.7596	8.5352	8.0083	8.776	13.1393
119	mmu-miR-378a-3p	miR-378/422a/378bcdefhi	CUGGACU	N/A	15.5	OTHER				192.992	239.077	279.371	332.137	270.408	342.766	18.1417	19.8308	19.4895	23.0992	20.5714	23.3617	3.4323	4.6469	4.5105	5.1099	4.8599	5.666
120	mmu-miR-421-3p	miR-421	UCAACAG	guide	28.1	OTHER				89.0213	95.2734	109.023	108.905	118.981	152.491	10.4298	10.4844	10.8242	10.7102	9.8981	11.5343	2.0396	1.9527	1.9855	2.0615	1.9506	2.4718
121	mmu-miR-450a-5p	miR-450a/451a		guide
122	mmu-miR-450b-5p	miR-450b-5p.m	UUUGCAG	N/A	48	OTHER				366.316	476	710.213	1032.89	975.366	1289	37.0351	43.9818	52.8511	62	50.7805	61.675	7.3316	10.0127	12.7872	16.3132	11.4073	12.6125
123	mmu-miR-467c-5p	miR-467cd/1420ef	AAGUGCG	guide	11.7	OTHER				165	235.862	213.448	173.03	181.25	218.286	22.8438	26.0345	26.2069	21.7273	20.4688	22.0857	0.4656	0.5621	0.6069	0.5303	0.475	0.3714
124	mmu-miR-484	miR-344a-5p/484/3155/3155b	CAGGCUC	N/A	21.1	OTHER				71.2877	84.0404	94.5621	82.4274	91.4442	105.481	7.3783	8.0485	8.4094	7.188	7.6472	7.579	1.031	1.1974	1.3692	1.128	1.0344	0.8165
125	mmu-miR-532-5p	miR-532-5p/511	AUGCCUU	guide	12.3	FAST	FAST			27.2652	27.3362	33.1792	36.8343	36.954	43.68	1.7875	1.547	1.6965	2.318	2.3922	3.0013	0.3227	0.2862	0.2695	0.3336	0.3086	0.3557
126	mmu-miR-574-3p	miR-574-3p	ACGCUCA	guide	7.4	FAST	FAST			19.2	21.0586	28.4393	31.5835	34.964	42.5618	1.6232	1.6352	1.8343	1.7315	1.696	1.8375	0.4145	0.5626	0.7489	0.7293	0.7054	0.8131
127	mmu-miR-669c-5p	miR-669c	UAGUUGU	guide	7.5	FAST	FAST			135.323	153.387	202.456	248.07	261.017	322.131	5.871	6	7.7368	7.7544	7.1864	9.3115	0.5242	0.5081	1.1316	0.5842	0.4644	0.582
128	mmu-miR-744-5p	miR-744/1716	GCGGGGC	N/A	13.9	OTHER				37.3239	48.336	47.932	53.8842	51.0304	62.1716	0.6651	0.6864	0.6245	0.6921	0.5892	0.6019	0.1063	0.1378	0.1339	0.1832	0.1421	0.1338
129	mmu-miR-872-5p	miR-872/1421acal	AGGUUAC	N/A	23.9	OTHER				21.6216	26.5784	31.4592	37.4142	34.4685	41.8852	2.9392	2.7152	2.6373	2.9291	2.2885	2.8381	0.1153	0.1033	0.1032	0.0881	0.0427	0.0283
130	mmu-miR-93-5p	miR-17/17-5p/20ab/20b-5p/93/106ab/427/518a-3p/519d	AAAGUGC	guide	28	SLOW	SLOW			11.1281	14.0306	15.1072	14.5223	13.4033	15.9105	0.3396	0.2942	0.2404	0.1927	0.1883	0.1972	0.0272	0.0338	0.0376	0.0469	0.0467	0.0461
131	mmu-miR-96-5p	miR-96/507/1271	UUGGCAC	guide	17.7	OTHER				238.75	289.898	412.771	418.941	385.824	441.287	23.1146	25.4184	32.0602	35.0941	31.6484	33.5248	5.8771	7.6561	9.0807	8.6706	6.6154	6.6752
132	mmu-miR-98-5p	let-7/98/4458/4500	GAGGUAG	N/A	12.2	OTHER				26.6925	29.9793	25.9113	30.8679	30.508	36.6815	2.4469	2.2218	1.9731	2.1981	2.2135	1.9688	0.244	0.2847	0.2007	0.2004	0.209	0.2211
133	mmu-miR-99a-5p	miR-99ab/100	ACCCGUA	guide	48	SLOW	SLOW			25.3846	24.539	28.365	27.25	26.8864	39.2857	0.0729	0.0745	0.0456	0.0429	0.0476	0.0546
